# Supplementary material for: Validity and reliability of the Sustainable HEalthy Diet (SHED) index by comparison with EAT-Lancet diet, Mediterranean diet in Turkish adults
Source: PeerJ. 2024 Sep 30;12:e18120. doi: 10.7717/peerj.18120 (PMC11448654; doi:10.7717/peerj.18120)
Supplement: Supplemental Information 1 — The answers given to the Mediterranean Diet Adherence Screener (MEDAS) were included. (14 questions and answers were coded as 0=No and 1=Yes). The daily consumed amounts of the 27 foods in the Food Frequency Questionnaire are given in grams, and the daily amounts of the four beverages in the Beverage Frequency Questionnaire (BFQ) were presented in ml. [file peerj-12-18120-s001.xlsx]

## Sheet: SHED_ÖLCEK_eistatistik
No	Age	Gender	Education level	Do you have a diagnosed disease?	I prefer and eat meat products (poultry, beef, fish) more times per week compared to plant-based food (grains, legumes, fruits and vegetables)	I eat more plant-based food (grains, legumes, fruits and vegetables) instead of animal source foods (meat, dairy products and eggs)	I eat a variety of fruits and vegetables, at least 400 grams or 5 portions daily	I try to avoid meat and fatty meat products and prefer instead beans, legumes, lentils, fish, poultry or low-fat meat	I prefer buying and consuming low salt products	I try to avoid buying and consuming ultra-processed food products	I prefer drinking water (or carbonated water) as a main beverage	I choose low-sugar foods	I limit the frequency of consumption of sweetened beverages and sweets	I control the amount of salt I consume and limit adding salt to my meals	I separate waste and recycle food scraps at home with a composter	I prefer buying and eating food made in Turkey as much as possible	I limit my meat consumption	I try to eat crops that are reduced or free of pesticides and herbicides	I try to consume organic food products on a regular basis	I am aware and act to reduce food waste in my close environment	I eat plant-based foods as an alternative to meat on a regular basis	Kindly specify type of composter_Neighborhood	Private (backyard)	Kindly specify the type of organic food you consume_vegetables	Kindly specify the type of organic food you consume_fruits	Kindly specify the type of organic food you consume_grains	Kindly specify the type of organic food you consume_dairy_products	Kindly specify the type of organic food you consume_meat	Kindly specify the type of organic food you consume_none	When purchasing organic food_directly from the farmer	Smallshoptown	Social business	restourant	Self-grow	other	Where do you buy fruits and vegetables?_self_grow	Where do you buy fruits and vegetables? Direct delivery	Where do you buy fruits and vegetables? Buy directly at a farm	Where do you buy fruits and vegetables? At the market	Where do you buy fruits and vegetables? At a grocery store	Where do you buy fruits and vegetables?Green grocery	Where do you buy fruits and vegetables?Home delivery	Where do you buy fruits and vegetables? Shop in person	At what frequency do you Eat pre-prepared meals - frozen	At what frequency do you /Eat pre-prepared meals – chilled (packed)	At what frequency do you/ Eat homemade or home cooked food	At what frequency do you Eat in restaurants or eateries or cafeteria at work	At what frequency do you Cook food by myself	At what frequency do you Consume food cooked 1-3 days prior to eating
99	26	Women	University	no	Almost Always True	Almost Always True	Almost Always True	Almost Always True	Almost Always True	Almost Always True	Almost Always True	Almost Always True	Almost Always True	Almost Always True	Almost Always True	Almost Always True	Almost Always True	Almost Always True	Almost Always True	Almost Always True	Almost Always True	No	No	No	No	No	No	No	No	Yes	Yes	Yes	Yes	No	No	Seldom	Some of the time	Seldom	Most of the time	Most of the time	Most of the time	Most of the time	Most of the time	Daily or almost daily	Daily or almost daily	Daily or almost daily	Daily or almost daily	Daily or almost daily	Daily or almost daily
98	22	Women	highschool	no	Rarely True	Often True	Almost Never True	Often True	Almost Never True	Almost Never True	Often True	Often True	Often True	Almost Never True	Almost Never True	Rarely True	Almost Never True	Almost Never True	Almost Never True	Often True	Often True	No	No	No	No	No	No	No	No	Yes	Yes	Yes	Yes	No	No	Never	Most of the time	Most of the time	Some of the time	Some of the time	Some of the time	Some of the time	Some of the time	Never	Never	Daily or almost daily	Sometimes	Daily or almost daily	Never
97	22	Men	highschool	no	Rarely True	Often True	Rarely True	Often True	Rarely True	Often True	Often True	Often True	Often True	Often True	Almost Never True	Rarely True	Rarely True	Often True	Rarely True	Often True	Rarely True	No	No	Yes	Yes	Yes	Yes	Yes	No	No	Yes	Yes	Yes	No		Never	Seldom	Seldom	Most of the time	Most of the time	Most of the time	Never	Most of the time	Rarely	Rarely	Often	Sometimes	Often	Never
96	21	Women	highschool	no	Rarely True	Almost Never True	Rarely True	Almost Always True	Almost Always True	Almost Always True	Almost Always True	Almost Never True	Almost Never True	Almost Always True	Almost Never True	Almost Never True	Almost Never True	Almost Never True	Almost Never True	Almost Never True	Almost Never True	No	No	Yes	Yes	Yes	Yes	Yes	No	No	No	Yes	Yes			Never	Seldom	Some of the time	Some of the time	Some of the time	Seldom	Never	Seldom	Rarely	Rarely	Never	Occasionally	Rarely	Rarely
95	22	Women	highschool	no	Often True	Rarely True	Rarely True	Rarely True	Often True	Almost Always True	Rarely True	Rarely True	Almost Always True	Almost Always True	Rarely True	Often True	Often True	Almost Always True	Almost Always True	Almost Always True	Almost Always True	No	No	Yes	Yes	Yes	Yes	Yes	No	No	Yes	Yes	Yes	No	Yes	Most of the time	Never	Seldom	Most of the time	Most of the time	Some of the time	Never	Never
94	23	Women	highschool	no	Often True	Almost Always True	Almost Never True	Almost Never True	Rarely True	Often True	Often True	Rarely True	Often True	Rarely True	Almost Never True	Often True	Rarely True	Rarely True	Rarely True	Rarely True	Almost Never True	No	No	Yes	No	Yes	Yes	Yes	No	Yes	Yes	No	No	Yes		Most of the time	Seldom				Seldom			Rarely	Occasionally	Often	Sometimes	Sometimes	Occasionally
93	22	Women	postgraduate	no	Often True	Almost Never True	Almost	Almost Always True	Almost Never True	Rarely True	Almost Always True	Almost Always True	Often True	Almost Never True	Almost Never True	Almost Always True	Almost Always True	Almost Never True	Rarely True	Almost Always True	Almost Always True	No	No	Yes	Yes	No	Yes	Yes	No	Yes	Yes	No	No			Never	Seldom	Seldom	Seldom	Some of the time	Most of the time	Never	Some of the time	Rarely	Rarely	Daily or almost daily	Often	Daily or almost daily	Daily or almost daily
92	24	Women	postgraduate	no	Often True	Rarely True	Rarely True	Almost Never True	Almost Never True	Often True	Rarely True	Often True	Rarely True	Almost Never True	Almost Never True	Almost Always True	Almost Never True	Rarely True	Rarely True	Almost Always True	Rarely True	No	No	No	No	No	No	No	No	No	Yes	Yes	No	No		Never	Never	Never	Most of the time	Some of the time	Some of the time	Seldom	Most of the time	Sometimes	Rarely	Often	Sometimes	Often	Occasionally
91	22	Women	highschool	gastritis	Almost Always True	Almost Always True	Often True	Often True	Rarely True	Rarely True	Almost Always True	Often True	Almost Always True	Often True	Almost Never True	Often True	Often True	Rarely True	Rarely True	Rarely True	Often True	No	No	No	No	No	No	No	No	Yes	Yes	No	No	No	No	Never	Never	Never	Most of the time	Most of the time	Some of the time	Some of the time	Some of the time	Sometimes	Sometimes	Daily or almost daily	Never	Daily or almost daily	Often
90	22	Women	highschool	no	Rarely True	Rarely True	Rarely True	Often True	Rarely True	Rarely True	Almost Always True	Almost Always True	Often True	Often True	Almost Never True	Rarely True	Almost Never True	Often True	Often True	Often True	Rarely True	No	No	No	No	Yes	Yes	No	No	Yes	Yes	Yes	No	No		Seldom	Some of the time	Never	Seldom	Never	Never	Never	Most of the time	Rarely	Never	Daily or almost daily	Daily or almost daily	Often	Often
9	47	Women	postgraduate	no	Rarely True	Almost Never True	Rarely True	Almost Never True	Almost Never True	Almost Never True	Almost Never True	Rarely True	Often True	Almost Never True	Rarely True	Almost Never True	Rarely True	Almost Never True	Rarely True	Almost Never True	Rarely True	No	No	Yes	Yes	Yes	Yes	Yes	No	No	Yes	Yes	Yes	No		Seldom	Some of the time	Seldom		Some of the time	Some of the time	Some of the time	Some of the time	Rarely	Occasionally	Occasionally	Occasionally	Occasionally	Occasionally
89	40	Women	University	no	Often True	Rarely True	Often True	Rarely True	Almost Never True	Almost Always True	Often True	Almost Never True	Almost Always True	Almost Never True	Rarely True	Almost Always True	Almost Never True	Almost Always True	Almost Always True	Almost Always True	Almost Always True	No	No	Yes	Yes	Yes	Yes	Yes	No	No	Yes	Yes	No	Yes		Most of the time	Seldom	Never	Most of the time	Seldom	Seldom	Seldom	Most of the time	Rarely	Rarely	Daily or almost daily	Sometimes	Sometimes	Rarely
88	22	Women	highschool	no	Rarely True	Often True	Often True	Almost Always True	Almost Always True	Often True	Often True	Almost Never True	Rarely True	Often True	Rarely True	Almost Always True	Often True	Often True	Often True	Almost Always True	Almost Always True	No	No	Yes	Yes	No	Yes	Yes	No	Yes	No	Yes							Most of the time							Sometimes
87	24	Women	highschool	no	Often True	Almost Never True	Rarely True	Rarely True	Almost Never True	Almost Always True	Almost Always True	Almost Never True	Almost Always True	Almost Never True	Rarely True	Almost Always True	Rarely True	Almost Always True	Often True	Often True	Rarely True	No	No	Yes	Yes	No	Yes	Yes	No	Yes	Yes	Yes	No	Yes	Yes	Most of the time	Most of the time	Most of the time	Seldom	Some of the time	Some of the time	Seldom	Seldom	Occasionally	Occasionally	Often	Often	Daily or almost daily	Sometimes
86	20	Women	highschool	gastritis	Often True	Almost Never True	Almost Never True	Rarely True	Often True	Often True	Rarely True	Often True	Almost Always True	Almost Always True	Almost Never True	Almost Always True	Rarely True	Often True	Almost Never True	Almost Always True	Often True	No	No	No	No	No	No	No	No	No	No	No	No			Never	Never	Never	Most of the time	Some of the time	Some of the time	Never	Some of the time	Occasionally	Never	Often	Daily or almost daily	Often	Occasionally
85	23	Women	highschool	no	Often True	Often True	Rarely True	Often True	Often True	Rarely True	Rarely True	Often True	Almost Always True	Often True	Almost Never True	Rarely True	Rarely True	Rarely True	Often True	Often True	Rarely True	No	No	No	No	Yes	Yes	Yes	No	No	Yes	No	Yes	No	No	Never	Some of the time	Seldom	Some of the time	Seldom	Seldom	Seldom	Seldom	Occasionally	Occasionally	Occasionally	Daily or almost daily	Sometimes	Occasionally
84	22	Women	highschool	no	Rarely True	Often True	Rarely True	Often True	Often True	Rarely True	Often True	Often True	Almost Always True	Rarely True	Almost Never True	Rarely True	Rarely True	Rarely True	Rarely True	Rarely True	Rarely True	No	No	Yes	Yes	Yes	No	No	No	No	Yes	Yes				Most of the time	Some of the time		Some of the time					Never	Never	Daily or almost daily	Never	Daily or almost daily	Daily or almost daily
83	26	Women	highschool	no	Almost Never True	Rarely True	Rarely True	Rarely True	Rarely True	Rarely True	Rarely True	Rarely True	Almost Always True	Rarely True	Rarely True	Rarely True	Almost Never True	Rarely True	Almost Never True	Almost Never True	Rarely True	No	No	Yes	Yes	No	Yes	Yes	No	Yes	Yes	Yes	Yes	Yes	Yes	Most of the time	Some of the time	Some of the time	Most of the time	Seldom	Most of the time	Never	Most of the time	Occasionally	Never	Occasionally	Sometimes	Sometimes	Daily or almost daily
82	47	Women	University	no	Rarely True	Rarely True	Almost Never True	Almost Never True	Almost Never True	Often True	Almost Always True	Often True	Almost Always True	Almost Never True	Almost Never True	Almost Never True	Rarely True	Rarely True	Rarely True	Often True	Rarely True	No	No	Yes	Yes	Yes	Yes	Yes	No	No	Yes	Yes				Never	Seldom		Most of the time		Some of the time			Never	Never	Daily or almost daily	Never	Never	Occasionally
81	21	Women	postgraduate	gastritis	Rarely True	Often True	Often True	Often True	Often True	Almost Never True	Almost Never True	Almost Never True	Almost Always True	Almost Never True	Almost Never True	Rarely True	Rarely True	Almost Never True	Almost Always True	Almost Always True	Almost Always True	No	No	Yes	Yes	Yes	No	Yes	No	No	Yes	No	No	No	Yes	Never	Some of the time	Some of the time	Some of the time	Some of the time	Some of the time	Never	Never	Rarely	Never	Daily or almost daily	Rarely	Daily or almost daily	Occasionally
80	23	Women	highschool	no	Often True	Often True	Rarely True	Almost Always True	Often True	Often True	Almost Always True	Almost Always True	Rarely True	Almost Always True	Almost Never True	Almost Always True	Often True	Often True	Often True	Almost Always True	Often True	No	No	Yes	Yes	No	Yes	Yes	No	Yes	Yes	No	No				Most of the time							Occasionally	Never	Daily or almost daily	Sometimes	Daily or almost daily	Never
8	28	Men	University	no	Almost Always True	Often True	Often True	Rarely True	Often True	Almost Always True	Almost Always True	Rarely True	Almost Always True	Almost Always True	Almost Never True	Almost Always True	Often True	Often True	Often True	Almost Always True	Often True	No	No	Yes	Yes	Yes	Yes	Yes	No	Yes	Yes	No	No	Yes		Most of the time	Some of the time	Some of the time	Seldom	Most of the time	Most of the time	Never	Seldom	Never	Never	Daily or almost daily	Never	Daily or almost daily	Occasionally
79	21	Women	highschool	no	Often True	Almost Always True	Rarely True	Almost Never True	Often True	Rarely True	Almost Never True	Rarely True	Often True	Almost Always True	Often True	Almost Always True	Almost Never True	Often True	Almost Always True	Almost Always True	Almost Never True	No	No	Yes	Yes	No	No	Yes	No	Yes	Yes	No	No	Yes		Seldom	Some of the time	Seldom	Some of the time	Never	Some of the time	Never	Most of the time	Occasionally	Sometimes	Daily or almost daily	Occasionally	Daily or almost daily	Often
78	21	Women	highschool	no	Almost Always True	Almost Always True	Almost Never True	Almost Never True	Rarely True	Almost Never True	Almost Never True	Almost Never True	Often True	Almost Never True	Almost Never True	Almost Never True	Almost Never True	Almost Never True	Almost Never True	Almost Always True	Almost Never True	No	No	No	No	No	No	No	Yes	No	No	No	No			Never	Never	Never	Most of the time	Most of the time	Seldom	Most of the time	Seldom	Rarely	Rarely	Often	Often	Often	Sometimes
77	19	Women	postgraduate	no	Rarely True	Often True	Often True	Almost Always True	Rarely True	Almost Always True	Almost Always True	Often True	Often True	Almost Always True	Almost Never True	Often True	Often True	Almost Always True	Almost Always True	Almost Always True	Almost Always True	No	No	Yes	Yes	No	Yes	Yes	No	Yes	Yes	No	No	No	No	Seldom	Seldom	Some of the time	Seldom	Never	Seldom	Never	Seldom	Never	Never	Daily or almost daily	Never	Daily or almost daily	Never
76	22	Women	highschool	no	Rarely True	Rarely True	Almost Never True	Rarely True	Rarely True	Almost Never True	Rarely True	Rarely True	Almost Always True	Almost Never True	Almost Never True	Almost Never True	Almost Never True	Almost Never True	Almost Never True	Rarely True	Often True	No	No	No	No	No	No	No	Yes	Yes	Yes	No	No	Yes	Yes	Seldom	Never	Never	Some of the time	Some of the time	Some of the time	Never	Some of the time	Sometimes	Sometimes	Rarely	Rarely	Rarely	Rarely
75	22	Women	highschool	no	Often True	Often True	Rarely True	Often True	Rarely True	Rarely True	Often True	Often True	Often True	Rarely True	Almost Never True	Often True	Rarely True	Rarely True	Often True	Often True	Often True	No	No	No	No	No	No	No	Yes	No	No	No	No	No	Yes	Seldom	Seldom	Never	Most of the time	Some of the time	Never	Some of the time	Some of the time	Often	Often	Often	Often	Often	Often
74	21	Women	highschool	no	Rarely True	Almost Always True	Often True	Often True	Almost Always True	Often True	Almost Always True	Almost Always True	Often True	Almost Always True	Almost Never True	Rarely True	Rarely True	Rarely True	Rarely True	Rarely True	Rarely True	No	No	Yes	Yes	Yes	Yes	Yes	Yes	Yes	Yes	Yes	No	No	Yes	Never	Some of the time	Never	Most of the time	Most of the time	Never	Never	Most of the time	Sometimes	Never	Daily or almost daily	Never	Daily or almost daily	Sometimes
73	20	Women	highschool	no	Often True	Rarely True	Almost Never True	Rarely True	Rarely True	Rarely True	Rarely True	Rarely True	Often True	Rarely True	Rarely True	Almost Always True	Almost Always True	Often True	Often True	Often True	Often True	No	No	Yes	No	No	Yes	No	No	No	No	Yes				Never	Seldom	Never	Most of the time	Seldom			Seldom	Rarely	Rarely	Daily or almost daily
72	26	Women	postgraduate	no	Rarely True	Almost Never True	Almost Never True	Almost Never True	Almost Never True	Almost Never True	Almost Always True	Almost Never True	Almost Always True	Almost Never True	Almost Never True	Almost Never True	Almost Never True	Almost Never True	Almost Never True	Almost Always True	Almost Never True	No	No	No	No	No	No	No	No	No	No	Yes	No	No		Never	Never	Never	Never	Never	Never	Never	Never	Rarely	Never	Often	Occasionally	Daily or almost daily	Rarely
71	22	Women	highschool	no	Often True	Often True	Rarely True	Often True	Often True	Almost Always True	Almost Always True	Almost Always True	Rarely True	Often True	Rarely True	Often True	Often True	Rarely True	Often True	Often True	Almost Never True	No	No	No	No	Yes	Yes	No	No	No	No	No				Never	Never	Seldom	Seldom	Seldom	Seldom	Seldom	Some of the time	Rarely	Never	Rarely	Rarely	Occasionally	Occasionally
70	29	Women	University	no	Almost Always True	Often True	Rarely True	Often True	Rarely True	Often True	Often True	Rarely True	Almost Always True	Rarely True	Almost Never True	Rarely True	Often True	Almost Never True	Rarely True	Often True	Often True	No	No	No	No	No	No	No	Yes	Yes	Yes	Yes	Yes	No		Seldom	Some of the time	Never	Some of the time	Seldom	Some of the time	Some of the time	Some of the time	Never	Never	Daily or almost daily	Often	Often	Often
7	35	Women	University	no	Often True	Almost Always True	Rarely True	Rarely True	Often True	Rarely True	Almost Never True	Almost Never True	Often True	Almost Always True	Almost Never True	Rarely True	Almost Never True	Rarely True	Rarely True	Often True	Often True	No	No	No	No	No	No	No	Yes	No	No	No	No			Never	Never	Never	Most of the time	Most of the time	Most of the time	Never	Most of the time	Rarely	Rarely	Daily or almost daily	Rarely	Often	Daily or almost daily
69	20	Women	highschool	no	Often True	Often True	Often True	Often True	Almost Never True	Almost Never True	Often True	Often True	Almost Always True	Often True	Often True	Often True	Rarely True	Often True	Often True	Almost Always True	Almost Always True	No	No	Yes	Yes	Yes	Yes	Yes	No	Yes	No	No	No			Some of the time	Some of the time	Most of the time				Most of the time		Rarely	Rarely	Rarely	Rarely	Sometimes	Sometimes
68	23	Women	highschool	no	Often True	Often True	Almost Never True	Often True	Rarely True	Almost Never True	Almost Never True	Almost Never True	Almost Always True	Rarely True	Almost Never True	Often True	Rarely True	Almost Always True	Often True	Almost Always True	Rarely True	No	No	Yes	Yes	No	No	No	No	No	Yes	Yes	Yes			Seldom	Some of the time	Never	Most of the time	Most of the time	Most of the time	Never	Most of the time	Occasionally	Occasionally	Daily or almost daily	Daily or almost daily	Sometimes	Rarely
67	23	Women	highschool	no	Almost Always True	Almost Always True	Almost Always True	Almost Always True	Almost Never True	Almost Never True	Often True	Almost Always True	Rarely True	Almost Always True	Almost Never True	Rarely True	Rarely True	Almost Never True	Almost Never True	Often True	Often True	No	No	Yes	Yes	Yes	Yes	Yes	No	No	Yes	Yes	No	No		Never	Seldom	Never	Most of the time	Never	Seldom	Some of the time	Some of the time	Never	Never	Daily or almost daily	Sometimes	Daily or almost daily	Sometimes
66	19	Women	postgraduate	no	Almost Never True	Often True	Rarely True	Almost Never True	Almost Always True	Almost Never True	Almost Always True	Almost Never True	Almost Always True	Almost Always True	Almost Never True	Almost Never True	Almost Never True	Almost Never True	Almost Never True	Often True	Rarely True	No	No	No	No	No	No	No	Yes	No	No	Yes				Never	Never	Never	Most of the time	Most of the time	Most of the time	Most of the time	Most of the time	Occasionally	Occasionally	Daily or almost daily	Often	Never	Sometimes
65	19	Women	postgraduate	no	Often True	Rarely True	Rarely True	Rarely True	Almost Never True	Almost Never True	Rarely True	Almost Never True	Rarely True	Almost Never True	Almost Never True	Rarely True	Rarely True	Rarely True	Rarely True	Rarely True	Rarely True	No	No	No	No	Yes	Yes	No	No	No	Yes	No	No	No		Never	Some of the time	Never	Most of the time	Some of the time	Seldom	Some of the time	Some of the time	Rarely	Rarely	Rarely	Sometimes	Daily or almost daily	Sometimes
64	22	Women	highschool	no	Often True	Rarely True	Rarely True	Almost Always True	Almost Always True	Almost Always True	Almost Always True	Almost Always True	Often True	Almost Always True	Almost Never True	Almost Always True	Often True	Almost Always True	Almost Always True	Almost Always True	Almost Always True	No	No	Yes	Yes	Yes	No	Yes	No	No	Yes	No	No			Never	Seldom	Seldom	Never	Some of the time	Seldom	Never	Never	Never	Never	Daily or almost daily	Never	Daily or almost daily	Never
63	24	Women	highschool	gastritis	Often True	Often True	Almost Always True	Rarely True	Rarely True	Rarely True	Almost Always True	Often True	Rarely True	Rarely True	Often True	Often True	Often True	Often True	Almost Always True	Almost Always True	Often True	No	No	Yes	Yes	Yes	No	No	No	No	Yes	No	Yes			Most of the time	Most of the time	Never		Never	Seldom	Some of the time	Seldom	Occasionally	Rarely	Often	Daily or almost daily	Sometimes	Sometimes
62	22	Women	postgraduate	gastritis	Rarely True	Rarely True	Almost Never True	Rarely True	Rarely True	Rarely True	Almost Never True	Rarely True	Often True	Rarely True	Rarely True	Rarely True	Almost Never True	Almost Never True	Almost Never True	Almost Never True	Rarely True	No	No	Yes	Yes	Yes	Yes	Yes	No	Yes	Yes	No	No	No	No	Seldom	Seldom	Seldom	Some of the time	Some of the time	Some of the time	Some of the time	Some of the time	Rarely	Never	Occasionally	Occasionally	Occasionally	Occasionally
61	20	Women	highschool	no	Often True	Almost Always True	Often True	Almost Never True	Almost Never True	Rarely True	Almost Always True	Almost Never True	Rarely True	Rarely True	Almost Never True	Almost Always True	Often True	Rarely True	Rarely True	Almost Always True	Often True	No	No	Yes	Yes	Yes	Yes	Yes	No	Yes	Yes	Yes	No	Yes		Most of the time	Never	Some of the time	Most of the time	Seldom	Seldom	Seldom	Most of the time	Sometimes	Never	Daily or almost daily	Daily or almost daily	Daily or almost daily	Daily or almost daily
60	21	Women	highschool	no	Rarely True	Often True	Almost Always True	Often True	Often True	Almost Always True	Often True	Rarely True	Rarely True	Rarely True	Almost Never True	Rarely True	Rarely True	Almost Always True	Almost Always True	Often True	Rarely True	No	No	Yes	Yes	No	Yes	Yes	No	No	No	Yes				Never	Seldom	Never	Most of the time		Some of the time	Some of the time	Most of the time	Never	Never	Daily or almost daily	Often	Daily or almost daily	Sometimes
6	27	Women	secondary	no	Often True	Often True	Often True	Rarely True	Rarely True	Often True	Often True	Rarely True	Often True	Rarely True	Almost Never True	Often True	Rarely True	Often True	Rarely True	Rarely True	Rarely True	No	No	Yes	Yes	No	No	No	No	No	Yes	No	No			Never	Some of the time	Never	Most of the time	Some of the time	Some of the time	Never	Some of the time	Never	Never	Daily or almost daily	Sometimes	Daily or almost daily	Sometimes
59	23	Women	highschool	no	Almost Never True	Often True	Often True	Rarely True	Rarely True	Rarely True	Almost Never True	Rarely True	Almost Always True	Often True	Rarely True	Rarely True	Rarely True	Rarely True	Often True	Often True	Often True	No	No	Yes	Yes	Yes	No	Yes	No	No	Yes	Yes	Yes	No	No	Never	Never	Never	Never	Never	Never	Seldom	Seldom	Rarely	Rarely	Sometimes	Sometimes	Sometimes	Sometimes
58	21	Women	highschool	no	Often True	Rarely True	Rarely True	Rarely True	Rarely True	Rarely True	Often True	Rarely True	Often True	Often True	Almost Never True	Often True	Rarely True	Almost Never True	Almost Never True	Often True	Often True	No	No	No	No	No	No	No	Yes	No	Yes	Yes	No	No		Never	Never	Never	Most of the time	Seldom	Seldom	Some of the time	Most of the time	Occasionally	Never	Daily or almost daily	Daily or almost daily	Daily or almost daily	Often
57	26	Men	highschool	no	Almost Never True	Often True	Rarely True	Often True	Rarely True	Rarely True	Almost Always True	Rarely True	Almost Always True	Rarely True	Almost Never True	Almost Always True	Almost Never True	Almost Never True	Often True	Often True	Often True	No	No	Yes	Yes	No	Yes	Yes	No	No	No	No	No	No	Yes	Never	Never	Never	Never	Never	Never	Never	Never	Sometimes	Sometimes	Daily or almost daily	Never	Daily or almost daily	Sometimes
562	22	Women	highschool	no	Almost Always True	Almost Always True	Often True	Almost Always True	Almost Always True	Often True	Almost Always True	Almost Always True	Almost Never True	Almost Always True	Almost Never True	Almost Always True	Almost Always True	Almost Always True	Almost Always True	Almost Always True	Almost Always True	No	No	Yes	No	No	No	No	No	No	No	Yes							Most of the time		Most of the time			Sometimes	Often	Daily or almost daily	Often	Daily or almost daily	Daily or almost daily
561	22	Women	highschool	no	Rarely True	Often True	Rarely True	Rarely True	Often True	Often True	Often True	Rarely True	Often True	Often True	Almost Always True	Almost Always True	Often True	Almost Always True	Almost Always True	Almost Always True	Often True	No	No	Yes	Yes	No	Yes	Yes	No	Yes	Yes	No	No	Yes	Yes	Most of the time	Most of the time	Seldom	Most of the time	Most of the time	Most of the time	Never	Seldom	Never	Never	Daily or almost daily	Rarely	Daily or almost daily	Sometimes
560	27	Women	secondary	no	Almost Always True	Rarely True	Often True	Rarely True	Often True	Rarely True	Often True	Often True	Often True	Rarely True	Almost Never True	Often True	Almost Never True	Often True	Often True	Almost Always True	Rarely True	No	No	Yes	Yes	Yes	Yes	Yes	No	Yes	Yes	Yes				Never	Some of the time	Never	Most of the time	Some of the time	Some of the time	Some of the time	Most of the time	Sometimes	Never	Daily or almost daily	Daily or almost daily	Daily or almost daily	Often
56	21	Women	University	no	Almost Never True	Rarely True	Almost Never True	Almost Always True	Rarely True	Often True	Almost Always True	Almost Always True	Rarely True	Rarely True	Almost Never True	Often True	Rarely True	Often True	Often True	Often True	Often True	No	No	No	No	No	Yes	Yes	No	Yes	Yes	No	No	Yes		Seldom	Some of the time	Never	Seldom	Seldom	Some of the time	Never	Seldom	Never	Never	Never	Rarely	Daily or almost daily	Sometimes
559	20	Women	postgraduate	gastritis	Often True	Often True	Often True	Almost Never True	Often True	Almost Always True	Rarely True	Rarely True	Rarely True	Rarely True	Almost Never True	Almost Always True	Almost Always True	Often True	Often True	Almost Always True	Often True	No	No	Yes	Yes	Yes	Yes	Yes	No	Yes	Yes	Yes		Yes		Most of the time	Seldom	Some of the time	Seldom	Seldom	Seldom	Never	Some of the time	Never	Never	Daily or almost daily	Rarely	Daily or almost daily	Never
557	23	Women	University	no	Almost Always True	Often True	Almost Always True	Almost Always True	Rarely True	Rarely True	Almost Never True	Almost Always True	Almost Always True	Almost Never True	Almost Never True	Often True	Almost Always True	Almost Always True	Almost Always True	Almost Always True	Rarely True	No	No	Yes	Yes	Yes	Yes	Yes	No	No	Yes	No	No	Yes	No	Most of the time	Some of the time	Never	Some of the time	Some of the time	Some of the time	Some of the time	Some of the time	Rarely	Rarely	Daily or almost daily	Often	Often	Sometimes
556	21	Women	highschool	no	Almost Always True	Almost Always True	Rarely True	Almost Always True	Often True	Often True	Almost Always True	Almost Always True	Almost Never True	Almost Always True	Rarely True	Often True	Rarely True	Almost Always True	Often True	Almost Always True	Almost Always True	No	No	Yes	Yes	No	Yes	Yes	No	No	Yes	Yes	Yes	No		Never	Never	Seldom	Most of the time	Most of the time	Most of the time	Most of the time	Most of the time	Rarely	Rarely	Daily or almost daily	Daily or almost daily	Sometimes	Sometimes
555	29	Women	University	no	Rarely True	Almost Always True	Rarely True	Often True	Rarely True	Rarely True	Often True	Rarely True	Rarely True	Rarely True	Almost Never True	Almost Always True	Rarely True	Rarely True	Often True	Almost Always True	Rarely True	No	No	Yes	Yes	Yes	Yes	Yes	No	No	Yes	No	No			Never	Most of the time	Seldom	Some of the time	Seldom	Seldom	Never	Seldom	Rarely	Rarely	Rarely	Sometimes	Sometimes	Never
554	22	Women	highschool	no	Often True	Rarely True	Rarely True	Almost Never True	Almost Never True	Rarely True	Rarely True	Rarely True	Rarely True	Rarely True	Almost Always True	Almost Never True	Almost Never True	Almost Never True	Rarely True	Almost Always True	Rarely True	No	No	No	No	Yes	No	No	No	Yes	No	No	No	No	No	Some of the time	Never	Never	Never	Never	Never	Never	Never	Occasionally	Occasionally	Occasionally	Sometimes	Occasionally	Rarely
553	39	Women	University	no	Often True	Rarely True	Often True	Often True	Rarely True	Often True	Often True	Often True	Often True	Often True	Almost Never True	Rarely True	Rarely True	Often True	Often True	Almost Always True	Often True	No	No	Yes	Yes	No	No	Yes	No	Yes	Yes	Yes		No		Never	Some of the time	Seldom	Most of the time	Seldom	Most of the time	Some of the time	Some of the time	Occasionally	Often	Sometimes	Sometimes	Often	Sometimes
552	21	Men	postgraduate	no	Rarely True	Rarely True	Rarely True	Almost Always True	Often True	Often True	Almost Always True	Often True	Almost Never True	Almost Always True	Almost Never True	Often True	Almost Always True	Often True	Almost Always True	Often True	Often True	No	No	Yes	Yes	Yes	Yes	Yes	No	Yes	Yes	No				Seldom	Some of the time	Seldom	Seldom	Some of the time	Some of the time	Some of the time	Some of the time	Rarely	Rarely	Daily or almost daily	Often	Often	Often
551	21	Women	highschool	no	Almost Never True	Rarely True	Rarely True	Rarely True	Often True	Rarely True	Almost Always True	Rarely True	Almost Never True	Often True	Often True	Rarely True	Almost Never True	Rarely True	Often True	Often True	Rarely True	No	No	No	No	Yes	No	Yes	No	No	Yes	Yes	Yes	No		Never	Never	Never	Some of the time	Never	Some of the time	Some of the time	Some of the time	Rarely	Occasionally	Occasionally	Occasionally	Rarely	Rarely
550	20	Men	high school	no	Rarely True	Almost Always True	Often True	Often True	Rarely True	Rarely True	Almost Always True	Rarely True	Almost Always True	Rarely True	Almost Never True	Almost Never True	Almost Never True	Almost Never True	Almost Never True	Rarely True	Almost Never True	No	No	No	No	No	No	No	No	No	No	Yes							Never					Daily or almost daily	Sometimes	Daily or almost daily	Sometimes	Daily or almost daily	Sometimes
55	23	Women	highschool	no	Almost Never True	Rarely True	Rarely True	Rarely True	Often True	Almost Never True	Almost Never True	Rarely True	Almost Always True	Often True	Almost Never True	Often True	Almost Never True	Often True	Rarely True	Rarely True	Almost Never True	No	No	Yes	No	Yes	Yes	Yes	No	No	No	No		Yes		Seldom	Some of the time	Never	Seldom	Seldom	Some of the time	Seldom	Never	Sometimes	Occasionally	Often	Often	Sometimes	Sometimes
549	28	Women	secondary	no	Often True	Almost Always True	Often True	Almost Always True	Almost Always True	Rarely True	Almost Always True	Almost Never True	Almost Always True	Almost Always True	Almost Never True	Almost Never True	Almost Always True	Rarely True	Rarely True	Almost Always True	Almost Always True	No	No	Yes	Yes	No	No	No	No	Yes	Yes	No	No	Yes	No	Some of the time	Some of the time	Some of the time	Most of the time	Most of the time	Most of the time	Never	Never	Rarely	Often	Daily or almost daily	Rarely	Daily or almost daily	Daily or almost daily
548	31	Men	University	no	Often True	Almost Never True	Almost Never True	Almost Never True	Almost Always True	Almost Never True	Almost Always True	Often True	Rarely True	Almost Always True	Almost Never True	Almost Never True	Almost Never True	Almost Never True	Almost Never True	Almost Always True	Rarely True	No	No	No	No	No	No	No	No	No	No	Yes	Yes	No		Never	Never	Never	Most of the time	Most of the time	Most of the time	Most of the time	Most of the time	Rarely	Never	Daily or almost daily	Often	Never	Rarely
547	42	Men	University	no	Often True	Often True	Rarely True	Rarely True	Almost Never True	Rarely True	Often True	Almost Never True	Almost Always True	Often True	Almost Never True	Often True	Almost Never True	Rarely True	Rarely True	Often True	Rarely True	No	No	No	No	Yes	Yes	No	No	No	No	Yes											Most of the time	Never	Never	Daily or almost daily	Rarely	Sometimes	Sometimes
546	25	Men	highschool	no	Often True	Rarely True	Almost Never True	Almost Never True	Almost Never True	Almost Always True	Almost Always True	Almost Always True	Almost Always True	Rarely True	Almost Never True	Almost Always True	Almost Always True	Almost Always True	Rarely True	Often True	Almost Never True	No	No	Yes	Yes	Yes	Yes	Yes	No	Yes	Yes	No				Seldom	Most of the time	Seldom	Most of the time	Some of the time	Some of the time	Most of the time	Some of the time	Occasionally	Occasionally	Daily or almost daily	Occasionally	Daily or almost daily	Often
545	24	Women	highschool	no	Almost Always True	Almost Never True	Rarely True	Rarely True	Rarely True	Almost Never True	Rarely True	Rarely True	Almost Never True	Rarely True	Rarely True	Almost Never True	Rarely True	Almost Never True	Almost Never True	Rarely True	Rarely True	No	No	No	No	Yes	No	No	No	No	No	No			Yes				Never			Most of the time	Most of the time	Never	Never	Daily or almost daily	Rarely	Daily or almost daily	Daily or almost daily
544	45	Men	University	no	Often True	Rarely True	Rarely True	Rarely True	Rarely True	Rarely True	Rarely True	Rarely True	Almost Never True	Rarely True	Rarely True	Rarely True	Rarely True	Rarely True	Often True	Rarely True	Rarely True	No	No	Yes	Yes	Yes	Yes	Yes	No	No	No	Yes		No	No	Most of the time	Seldom	Never	Some of the time	Some of the time	Seldom	Some of the time	Some of the time	Rarely	Rarely	Rarely	Occasionally	Rarely	Rarely
543	30	Men	University	no	Often True	Often True	Rarely True	Often True	Rarely True	Often True	Often True	Rarely True	Almost Always True	Rarely True	Rarely True	Often True	Rarely True	Often True	Often True	Rarely True	Rarely True	No	No	No	No	Yes	Yes	Yes	No	No	No	No							Most of the time					Rarely	Rarely	Daily or almost daily		Sometimes	Sometimes
542	29	Men	University	no	Often True	Almost Always True	Rarely True	Often True	Often True	Rarely True	Almost Always True	Rarely True	Often True	Often True	Almost Never True	Often True	Often True	Rarely True	Rarely True	Often True	Often True	No	No	No	No	No	No	No	No	No	No	No	No		Yes	Never	Never	Never	Some of the time	Some of the time	Some of the time	Some of the time	Some of the time	Rarely	Never	Daily or almost daily	Never	Daily or almost daily	Sometimes
541	20	Women	high school	no	Often True	Often True	Often True	Rarely True	Almost Never True	Almost Never True	Rarely True	Almost Never True	Often True	Almost Never True	Almost Never True	Often True	Almost Never True	Often True	Often True	Rarely True	Almost Never True	No	No	Yes	No	Yes	No	Yes	No	No	No	Yes	Yes			Seldom	Some of the time	Never	Most of the time	Most of the time	Most of the time	Most of the time	Most of the time	Never	Never	Daily or almost daily	Sometimes	Daily or almost daily	Daily or almost daily
540	18	Women	postgraduate	no	Often True	Rarely True	Almost Never True	Almost Never True	Almost Never True	Almost Never True	Rarely True	Rarely True	Rarely True	Rarely True	Almost Never True	Rarely True	Almost Never True	Almost Never True	Rarely True	Rarely True	Rarely True	No	No	No	No	No	Yes	Yes	No	Yes	Yes	No	No			Seldom	Some of the time	Never	Some of the time	Some of the time	Never	Never	Seldom	Never	Never	Occasionally	Never	Daily or almost daily	Occasionally
54	22	Women	highschool	no	Rarely True	Rarely True	Rarely True	Rarely True	Rarely True	Rarely True	Rarely True	Rarely True	Almost Always True	Rarely True	Rarely True	Rarely True	Rarely True	Almost Never True	Rarely True	Rarely True	Rarely True	No	No	No	No	No	No	No	No	No	No	No				Seldom	Some of the time	Some of the time	Some of the time		Some of the time	Some of the time	Some of the time	Rarely	Never	Never	Never	Rarely	Never
539	32	Men	University	no	Often True	Often True	Almost Always True	Rarely True	Often True	Almost Always True	Almost Always True	Almost Never True	Rarely True	Rarely True	Almost Never True	Almost Always True	Rarely True	Almost Always True	Almost Always True	Almost Always True	Almost Always True	No	No	Yes	Yes	No	Yes	No	No	Yes	Yes	No	Yes			Seldom	Some of the time	Seldom	Most of the time	Seldom	Seldom	Some of the time	Most of the time	Rarely	Rarely	Daily or almost daily	Often	Daily or almost daily	Often
538	16	Men	postgraduate	no	Almost Never True	Rarely True	Rarely True	Almost Always True	Rarely True	Rarely True	Often True	Rarely True	Rarely True	Often True	Almost Never True	Often True	Almost Never True	Rarely True	Rarely True	Often True	Often True	No	No	Yes	Yes	No	Yes	Yes	No	No	Yes	No	No			Never	Never	Never	Never	Never	Most of the time	Never	Some of the time	Rarely	Rarely	Daily or almost daily	Often	Daily or almost daily	Rarely
537	22	Women	highschool	no	Rarely True	Almost Always True	Rarely True	Rarely True	Often True	Almost Never True	Almost Always True	Rarely True	Almost Never True	Often True	Almost Never True	Rarely True	Almost Never True	Often True	Rarely True	Often True	Almost Always True	No	No	Yes	Yes	Yes	Yes	No	No	Yes	Yes	No	No	No	No	Never	Seldom	Seldom	Some of the time	Seldom	Seldom	Seldom	Some of the time	Occasionally	Sometimes		Sometimes	Sometimes	Sometimes
536	25	Women	highschool	no	Almost Never True	Rarely True	Almost Never True	Almost Always True	Often True	Almost Never True	Rarely True	Rarely True	Almost Always True	Almost Always True	Almost Always True	Almost Always True	Often True	Often True	Rarely True	Almost Always True	Often True	No	No	Yes	Yes	No	Yes	No	No	No	Yes	Yes	Yes	No		Never	Seldom	Never	Some of the time	Never	Seldom	Never	Some of the time	Often	Sometimes	Daily or almost daily	Never	Daily or almost daily	Daily or almost daily
535	25	Men	highschool	no	Almost Always True	Rarely True	Rarely True	Rarely True	Rarely True	Rarely True	Often True	Rarely True	Rarely True	Rarely True	Almost Never True	Often True	Rarely True	Rarely True	Rarely True	Rarely True	Rarely True	No	No	Yes	Yes	Yes	No	Yes	No	No	No	Yes				Never	Seldom	Never	Most of the time	Some of the time	Some of the time	Some of the time	Most of the time	Sometimes	Rarely	Daily or almost daily	Rarely	Daily or almost daily	Daily or almost daily
534	28	Women	University	no	Rarely True	Rarely True	Rarely True	Rarely True	Rarely True	Often True	Often True	Often True	Rarely True	Often True	Almost Never True	Rarely True	Rarely True	Often True	Often True	Often True	Often True	No	No	No	No	Yes	Yes	No	No	No	Yes	Yes	Yes	No		Never	Some of the time	Seldom	Some of the time	Most of the time	Most of the time	Some of the time	Some of the time	Sometimes	Sometimes	Often	Sometimes	Often	Sometimes
533	40	Men	University	no	Rarely True	Often True	Often True	Often True	Often True	Rarely True	Often True	Rarely True	Rarely True	Often True	Rarely True	Rarely True	Rarely True	Rarely True	Almost Never True	Almost Never True	Rarely True	No	No	Yes	No	Yes	Yes	Yes	Yes	No	No	No							Never					Occasionally	Occasionally	Occasionally	Rarely	Sometimes	Rarely
532	57	Women	University	no	Almost Always True	Often True	Almost Never True	Often True	Often True	Rarely True	Almost Always True	Often True	Rarely True	Often True	Almost Never True	Almost Always True	Often True	Often True	Rarely True	Almost Always True	Often True	No	No	No	No	No	No	No	Yes	No	No	No	No											Sometimes	Rarely	Daily or almost daily	Often	Daily or almost daily	Rarely
531	19	Women	postgraduate	no	Almost Always True	Almost Never True	Rarely True	Rarely True	Almost Never True	Rarely True	Often True	Rarely True	Often True	Almost Never True	Almost Never True	Often True	Rarely True	Rarely True	Rarely True	Often True	Rarely True	No	No	Yes	No	Yes	No	Yes	No	No	No	Yes	No	No	No	Never	Seldom	Never	Most of the time	Some of the time	Some of the time	Some of the time	Some of the time	Sometimes	Occasionally	Daily or almost daily	Often	Often	Rarely
530	22	Women	highschool	no	Often True	Rarely True	Often True	Almost Always True	Rarely True	Rarely True	Rarely True	Rarely True	Rarely True	Rarely True	Almost Never True	Almost Never True	Almost Never True	Rarely True	Rarely True	Often True	Rarely True	No	No	No	No	No	No	No	No	No	No	Yes			Yes	Never	Seldom	Never	Most of the time	Some of the time	Never	Some of the time	Most of the time	Never	Never	Daily or almost daily	Rarely	Daily or almost daily	Occasionally
53	33	Women	postgraduate	no	Rarely True	Often True	Almost Always True	Almost Always True	Almost Always True	Almost Always True	Often True	Almost Always True	Often True	Almost Always True	Rarely True	Often True	Often True	Almost Always True	Almost Always True	Almost Always True	Almost Always True	No	No	Yes	Yes	Yes	Yes	Yes	No	Yes	Yes	Yes	Yes			Seldom	Most of the time	Most of the time	Some of the time	Seldom	Seldom	Seldom	Seldom	Rarely	Rarely	Daily or almost daily	Sometimes	Daily or almost daily	Sometimes
529	21	Women	highschool	no	Almost Never True	Often True	Rarely True	Often True	Rarely True	Rarely True	Often True	Rarely True	Almost Never True	Rarely True	Almost Never True	Often True	Rarely True	Rarely True	Rarely True	Often True	Rarely True	No	No	Yes	Yes	No	No	No	No	No	Yes	Yes				Seldom	Never	Never	Most of the time	Some of the time	Most of the time	Never	Most of the time	Often	Occasionally	Daily or almost daily	Often	Daily or almost daily	Often
528	22	Women	highschool	no	Almost Never True	Rarely True	Rarely True	Rarely True	Almost Never True	Almost Never True	Almost Never True	Almost Never True	Rarely True	Almost Never True	Almost Never True	Rarely True	Almost Never True	Often True	Often True	Often True	Often True	No	No	No	No	No	No	No	Yes	No	No	Yes				Seldom	Never	Never	Most of the time	Most of the time	Most of the time	Some of the time	Most of the time	Often	Sometimes	Daily or almost daily	Often	Daily or almost daily	Sometimes
527	35	Women	University	no	Rarely True	Rarely True	Almost Always True	Often True	Often True	Often True	Often True	Often True	Often True	Often True	Almost Never True	Often True	Often True	Often True	Often True	Often True	Often True	No	No	Yes	Yes	Yes	Yes	Yes	No	No	Yes	Yes	No	No	Yes	Seldom	Seldom	Never	Most of the time	Most of the time	Most of the time	Never	Most of the time	Never	Never	Daily or almost daily	Never	Daily or almost daily	Sometimes
526	36	Men	University	no	Almost Never True	Rarely True	Often True	Often True	Rarely True	Often True	Rarely True	Often True	Often True	Often True	Rarely True	Almost Always True	Rarely True	Almost Always True	Almost Always True	Almost Always True	Often True	No	No	Yes	Yes	Yes	Yes	Yes	No	Yes	No	No	No	Yes	Yes	Seldom	Seldom	Seldom	Seldom	Some of the time	Seldom	Never	Never	Never	Never	Daily or almost daily	Rarely	Daily or almost daily	Occasionally
525	21	Men	highschool	no	Almost Always True	Often True	Often True	Often True	Often True	Almost Always True	Almost Always True	Almost Always True	Almost Always True	Almost Always True	Almost Never True	Often True	Rarely True	Often True	Often True	Often True	Often True	No	No	Yes	Yes	Yes	No	Yes	No	No	Yes	Yes	Yes						Some of the time				Some of the time	Never	Never	Daily or almost daily	Often	Daily or almost daily	Daily or almost daily
524	25	Men	highschool	no	Often True	Almost Never True	Almost Always True	Almost Always True	Almost Always True	Almost Always True	Almost Always True	Often True	Almost Always True	Often True	Almost Never True	Almost Always True	Often True	Rarely True	Rarely True	Almost Always True	Rarely True	No	No	Yes	No	No	Yes	No	No	Yes	Yes	No	No	Yes		Some of the time	Some of the time	Never	Never	Never	Never	Never	Never	Never	Never	Daily or almost daily	Never	Daily or almost daily	Sometimes
523	27	Men	secondary	no	Often True	Often True	Almost Always True	Often True	Rarely True	Rarely True	Often True	Often True	Often True	Often True	Almost Never True	Rarely True	Almost Never True	Rarely True	Often True	Often True	Often True	No	No	Yes	Yes	Yes	Yes	Yes	No	Yes	Yes	Yes	Yes	Yes	Yes	Most of the time	Some of the time	Some of the time	Some of the time	Some of the time	Some of the time	Some of the time	Some of the time	Occasionally	Occasionally	Occasionally	Occasionally	Occasionally	Occasionally
522	23	Women	highschool	no	Often True	Often True	Often True	Rarely True	Often True	Often True	Often True	Often True	Often True	Often True	Rarely True	Rarely True	Often True	Often True	Often True	Rarely True	Often True	No	No	Yes	No	Yes	Yes	Yes	Yes	Yes	No	Yes	No	Yes	No	Most of the time	Some of the time	Some of the time	Some of the time	Seldom	Some of the time	Some of the time	Most of the time	Occasionally	Occasionally	Occasionally	Occasionally	Occasionally	Occasionally
521	19	Women	postgraduate	no	Almost Never True	Often True	Almost Never True	Almost Never True	Almost Always True	Almost Always True	Almost Always True	Almost Always True	Almost Always True	Almost Always True	Almost Never True	Almost Always True	Often True	Almost Always True	Often True	Almost Always True	Almost Always True	No	No	Yes	Yes	No	No	No	No	No	Yes	Yes	No	Yes	No	Most of the time	Some of the time	Some of the time	Most of the time	Never	Seldom	Never	Some of the time	Never	Never	Daily or almost daily	Never	Daily or almost daily	Often
520	21	Men	highschool	no	Almost Always True	Often True	Often True	Often True	Often True	Almost Always True	Almost Always True	Often True	Often True	Often True	Often True	Rarely True	Rarely True	Often True	Often True	Often True	Often True	No	No	No	No	No	Yes	Yes	No	Yes	No	No	No	Yes	No	Seldom	Never	Never	Never			Never	Seldom	Never	Never	Never	Rarely	Rarely	Never
52	40	Women	postgraduate	no	Often True	Rarely True	Rarely True	Rarely True	Rarely True	Rarely True	Rarely True	Rarely True	Almost Never True	Rarely True	Almost Never True	Rarely True	Rarely True	Rarely True	Rarely True	Rarely True	Rarely True	No	No	Yes	Yes	Yes	Yes	Yes	No	Yes	Yes	No	No	No	No	Most of the time	Never	Seldom	Seldom	Seldom	Seldom	Never	Never	Never	Never	Occasionally	Rarely	Occasionally	Rarely
519	#NULL!	Women	postgraduate	no	Almost Always True	Rarely True	Rarely True	Often True	Rarely True	Almost Always True	Often True	Often True	Almost Never True	Often True	Almost Never True	Often True	Often True	Almost Always True	Almost Always True	Often True	Often True	No	No	Yes	Yes	Yes	Yes	No	No	Yes	Yes	No	No	No	No	Never	Most of the time	Never	Most of the time	Some of the time	Some of the time	Never	Never	Never	Never	Daily or almost daily	Never	Daily or almost daily	Daily or almost daily
518	28	Men	University	no	Often True	Often True	Rarely True	Rarely True	Almost Always True	Rarely True	Almost Always True	Almost Always True	Almost Always True	Almost Always True	Almost Never True	Almost Always True	Rarely True	Almost Always True	Often True	Almost Always True	Often True	No	No	Yes	No	No	Yes	No	No	Yes	Yes	No	No			Most of the time	Most of the time	Most of the time	Seldom	Seldom	Some of the time	Never	Seldom	Rarely	Never	Daily or almost daily	Often	Often	Sometimes
517	22	Women	highschool	no	Often True	Often True	Rarely True	Often True	Rarely True	Rarely True	Often True	Rarely True	Almost Never True	Rarely True	Almost Always True	Often True	Almost Never True	Almost Never True	Rarely True	Rarely True	Often True	No	No	No	No	No	No	No	No	Yes	Yes	Yes	Yes	Yes	Yes	Most of the time	Seldom	Seldom	Most of the time	Most of the time	Most of the time	Never	Most of the time	Rarely	Rarely	Occasionally	Occasionally	Sometimes	Occasionally
516	24	Men	highschool	no	Often True	Rarely True	Rarely True	Rarely True	Often True	Almost Always True	Almost Always True	Almost Always True	Almost Always True	Almost Always True	Almost Never True	Almost Always True	Almost Never True	Often True	Often True	Almost Always True	Rarely True	No	No	No	No	Yes	No	Yes	No	No	No	No				Never				Never				Never	Never	Daily or almost daily	Rarely	Daily or almost daily	Occasionally
515	21	Women	highschool	no	Often True	Rarely True	Often True	Rarely True	Rarely True	Often True	Often True	Often True	Often True	Often True	Almost Never True	Often True	Rarely True	Often True	Often True	Often True	Often True	No	No	Yes	Yes	Yes	No	No	No	Yes	Yes	No	No			Never	Seldom	Seldom		Some of the time	Some of the time	Seldom	Most of the time	Rarely	Rarely	Daily or almost daily	Rarely	Daily or almost daily	Rarely
514	32	Women	University	no	Often True	Almost Never True	Rarely True	Almost Never True	Almost Never True	Rarely True	Often True	Rarely True	Almost Always True	Often True	Almost Never True	Rarely True	Almost Never True	Rarely True	Often True	Rarely True	Almost Never True	No	No	Yes	Yes	Yes	Yes	Yes	No	Yes	Yes	No				Never	Never	Seldom	Seldom	Seldom	Some of the time	Seldom	Never	Never	Never	Occasionally	Never	Never	Never
513	27	Men	secondary	no	Rarely True	Often True	Rarely True	Rarely True	Almost Never True	Almost Never True	Often True	Almost Never True	Often True	Almost Never True	Almost Never True	Almost Never True	Almost Never True	Almost Never True	Almost Never True	Often True	Almost Never True	No	No	Yes	Yes	No	No	No	No	Yes	No	No	No			Seldom	Most of the time	Never	Seldom	Never	Never	Never	Some of the time	Rarely	Never	Daily or almost daily	Sometimes	Never	Never
512	32	Women	University	no	Often True	Often True	Often True	Often True	Often True	Often True	Almost Always True	Often True	Almost Always True	Almost Always True	Almost Never True	Often True	Often True	Often True	Often True	Often True	Often True	No	No	No	No	No	No	No	Yes	No	No	No	No		Yes	Never	Seldom	Never	Most of the time	Seldom	Seldom	Never	Most of the time	Never	Never	Daily or almost daily	Sometimes	Often	Sometimes
511	22	Women	highschool	no	Almost Always True	Often True	Often True	Often True	Often True	Often True	Often True	Rarely True	Almost Always True	Almost Always True	Almost Never True	Rarely True	Often True	Rarely True	Almost Never True	Rarely True	Rarely True	No	No	Yes	Yes	No	No	No	No	Yes	Yes	No	No	No	No	Never	Never	Some of the time	Most of the time	Some of the time	Some of the time	Never	Most of the time	Rarely	Never	Daily or almost daily	Daily or almost daily	Daily or almost daily	Often
510	27	Men	secondary	no	Rarely True	Rarely True	Often True	Rarely True	Rarely True	Often True	Often True	Rarely True	Rarely True	Often True	Rarely True	Often True	Rarely True	Rarely True	Often True	Often True	Rarely True	No	No	Yes	Yes	Yes	Yes	No	No	Yes	No	No	No		Yes		Most of the time	Most of the time						Never	Never	Sometimes	Never	Sometimes	Rarely
51	22	Women	highschool	no	Often True	Often True	Rarely True	Often True	Often True	Almost Always True	Almost Always True	Almost Always True	Rarely True	Almost Always True	Almost Always True	Almost Always True	Almost Always True	Almost Always True	Almost Always True	Almost Always True	Almost Always True	No	No	Yes	Yes	Yes	No	No	No	Yes	Yes	No	No	Yes	Yes	Most of the time	Some of the time	Some of the time	Seldom	Some of the time	Some of the time	Never	Seldom	Rarely	Rarely	Daily or almost daily	Often	Often	Often
509	22	Women	highschool	no	Often True	Often True	Rarely True	Almost Never True	Almost Never True	Almost Never True	Often True	Often True	Rarely True	Almost Never True	Almost Never True	Often True	Rarely True	Often True	Often True	Often True	Rarely True	No	No	Yes	Yes	Yes	No	No	No	Yes	Yes	No	No	Yes		Seldom		Never	Seldom	Seldom		Never	Never	Occasionally	Occasionally	Often	Sometimes	Sometimes	Sometimes
508	22	Women	highschool	no	Rarely True	Almost Never True	Often True	Rarely True	Rarely True	Almost Never True	Almost Always True	Rarely True	Almost Always True	Almost Always True	Almost Never True	Almost Always True	Almost Never True	Almost Never True	Rarely True	Almost Always True	Almost Never True	No	No	No	No	No	No	No	No	No	Yes	No	No	No		Never	Never	Never	Seldom	Seldom	Seldom	Never	Never	Never	Never	Often	Often	Occasionally	Sometimes
507	25	Women	University	no	Often True	Almost Always True	Often True	Often True	Almost Always True	Often True	Often True	Often True	Rarely True	Often True	Almost Never True	Often True	Often True	Often True	Almost Always True	Almost Always True	Often True	No	No	Yes	Yes	Yes	Yes	Yes	No	Yes	Yes	Yes	Yes	No		Never	Seldom	Seldom	Some of the time	Most of the time	Most of the time	Most of the time	Most of the time	Rarely	Rarely	Sometimes	Often	Often	Daily or almost daily
506	60	Men	University	no	Rarely True	Rarely True	Rarely True	Rarely True	Rarely True	Rarely True	Almost Always True	Almost Always True	Often True	Almost Always True	Almost Never True	Almost Always True	Almost Never True	Almost Never True	Almost Never True	Often True	Rarely True	No	No	No	No	No	No	No	Yes	No	No	No	No	No	No	Never	Never	Never	Some of the time	Some of the time	Some of the time	Some of the time	Some of the time	Sometimes	Sometimes	Rarely	Often	Sometimes	Sometimes
505	54	Women	postgraduate	no	Almost Never True	Often True	Rarely True	Often True	Rarely True	Rarely True	Almost Never True	Rarely True	Often True	Often True	Almost Never True	Often True	Almost Never True	Rarely True	Rarely True	Almost Always True	Almost Never True	No	No	No	Yes	No	Yes	No	No	No	Yes	No	Yes			Never	Seldom	Some of the time	Most of the time	Seldom	Seldom	Seldom	Some of the time	Sometimes	Sometimes	Sometimes	Often	Occasionally	Sometimes
504	45	Women	University	no	Rarely True	Often True	Often True	Often True	Almost Never True	Rarely True	Almost Always True	Often True	Often True	Often True	Almost Never True	Almost Always True	Often True	Often True	Often True	Often True	Often True	No	No	No	No	Yes	No	No	No	No	No	No											Most of the time	Sometimes		Daily or almost daily	Rarely	Daily or almost daily	Sometimes
503	29	Women	University	no	Often True	Rarely True	Almost Always True	Almost Never True	Almost Always True	Almost Always True	Almost Always True	Almost Always True	Almost Always True	Almost Always True	Almost Never True	Almost Always True	Almost Never True	Almost Always True	Almost Always True	Almost Always True	Almost Never True	No	No	Yes	Yes	Yes	Yes	Yes	No	Yes	Yes	Yes	No	No		Seldom	Some of the time	Seldom	Seldom	Seldom	Seldom	Never	Seldom	Never	Never	Daily or almost daily	Daily or almost daily	Daily or almost daily	Daily or almost daily
502	46	Women	University	no	Rarely True	Rarely True	Almost Never True	Almost Never True	Almost Never True	Almost Always True	Almost Always True	Almost Always True	Rarely True	Often True	Almost Never True	Almost Always True	Rarely True	Often True	Often True	Almost Always True	Often True	No	No	Yes	Yes	Yes	Yes	Yes	No	Yes	No	No	No			Seldom	Never	Never	Never	Never	Never	Never	Never	Rarely	Rarely	Daily or almost daily	Daily or almost daily	Often	Rarely
501	23	Women	highschool	no	Often True	Rarely True	Rarely True	Almost Never True	Rarely True	Often True	Often True	Often True	Almost Always True	Rarely True	Almost Always True	Often True	Often True	Almost Always True	Almost Always True	Almost Always True	Rarely True	No	No	No	No	No	No	No	No	No	No	No	No	No	No	Never	Never	Never	Most of the time	Some of the time	Seldom	Never	Some of the time	Sometimes	Never	Often	Often	Sometimes	Often
500	22	Women	highschool	no	Rarely True	Rarely True	Rarely True	Often True	Rarely True	Almost Never True	Rarely True	Rarely True	Often True	Rarely True	Almost Never True	Almost Always True	Rarely True	Often True	Rarely True	Almost Always True	Rarely True	No	No	No	No	Yes	No	Yes	No	Yes	Yes	No	No	No		Never	Some of the time	Seldom	Some of the time	Some of the time	Some of the time	Seldom	Some of the time	Occasionally	Never	Daily or almost daily	Daily or almost daily	Daily or almost daily	Sometimes
50	21	Women	highschool	no	Almost Always True	Rarely True	Often True	Rarely True	Almost Always True	Rarely True	Almost Always True	Almost Always True	Almost Always True	Almost Always True	Almost Never True	Often True	Often True	Almost Never True	Almost Never True	Almost Always True	Rarely True	No	No	No	No	No	No	No	No	No	No	No	No	No		Never	Seldom	Seldom	Most of the time	Some of the time	Some of the time	Never	Most of the time	Occasionally	Occasionally	Daily or almost daily	Occasionally	Daily or almost daily	Often
5	37	Women	University	no	Often True	Often True	Almost Always True	Almost Always True	Often True	Often True	Almost Always True	Often True	Almost Always True	Often True	Almost Never True	Rarely True	Almost Never True	Often True	Almost Never True	Rarely True	Almost Never True	No	No	Yes	Yes	Yes	Yes	Yes	No	No	No	Yes	Yes	No	Yes	Never	Seldom	Seldom	Seldom	Never		Never	Some of the time	Occasionally	Rarely	Rarely	Occasionally	Occasionally	Occasionally
498	18	Women	postgraduate	no	Almost Never True	Often True	Rarely True	Often True	Rarely True	Almost Always True	Almost Always True	Rarely True	Rarely True	Often True	Almost Never True	Almost Always True	Almost Always True	Almost Always True	Rarely True	Often True	Often True	No	No	Yes	Yes	Yes	No	No	No	No	Yes	No	No			Never	Seldom	Never	Some of the time	Some of the time	Some of the time	Seldom	Seldom	Never	Never	Daily or almost daily	Rarely	Daily or almost daily	Sometimes
497	50	Women	University	no	Often True	Almost Never True	Rarely True	Almost Never True	Rarely True	Often True	Often True	Often True	Often True	Often True	Almost Never True	Almost Always True	Almost Never True	Often True	Often True	Almost Always True	Almost Never True	No	No	No	No	No	No	No	No	Yes	Yes	Yes	No	No		Seldom	Most of the time	Some of the time	Some of the time	Some of the time	Some of the time	Some of the time	Some of the time	Occasionally	Rarely	Daily or almost daily	Occasionally	Sometimes	Daily or almost daily
496	30	Women	postgraduate	no	Almost Always True	Often True	Often True	Rarely True	Almost Always True	Almost Always True	Almost Always True	Almost Always True	Almost Always True	Almost Always True	Almost Never True	Often True	Rarely True	Almost Always True	Almost Always True	Almost Always True	Often True	No	No	No	No	Yes	Yes	Yes	No	Yes	Yes	Yes	Yes	No		Most of the time	Some of the time	Seldom	Most of the time					Never	Never	Daily or almost daily	Daily or almost daily	Daily or almost daily	Never
495	55	Men	University	no	Almost Always True	Rarely True	Rarely True	Rarely True	Almost Never True	Rarely True	Almost Never True	Rarely True	Rarely True	Almost Always True	Almost Never True	Often True	Rarely True	Almost Always True	Almost Always True	Rarely True	Often True	No	No	Yes	No	No	Yes	No	No	No	No	Yes	No	No		Never	Never	Some of the time	Some of the time	Some of the time	Some of the time		Some of the time	Never	Rarely	Occasionally	Daily or almost daily	Occasionally	Rarely
494	35	W	University	no	Rarely True	Often True	Often True	Often True	Rarely True	Rarely True	Rarely True	Rarely True	Rarely True	Rarely True	Almost Never True	Often True	Often True	Often True	Often True	Often True	Often True	No	No	No	No	Yes	Yes	Yes	No	Yes	Yes	No	No			Seldom	Most of the time	Most of the time	Never	Seldom	Some of the time	Some of the time	Never	Never	Never	Often	Rarely	Occasionally	Occasionally
493	42	Women	University	no	Rarely True	Rarely True	Rarely True	Rarely True	Rarely True	Rarely True	Often True	Rarely True	Often True	Often True	Almost Never True	Almost Never True	Rarely True	Almost Always True	Rarely True	Almost Always True	Often True	No	No	Yes	No	No	Yes	No	No	Yes	Yes	No	No	Yes		Seldom	Some of the time	Never	Seldom	Seldom	Seldom	Never	Seldom	Rarely	Rarely	Daily or almost daily	Rarely	Daily or almost daily	Rarely
492	32	Women	University	no	Rarely True	Often True	Almost Always True	Almost Never True	Almost Never True	Almost Always True	Almost Always True	Almost Always True	Often True	Often True	Almost Never True	Rarely True	Almost Never True	Almost Always True	Often True	Almost Always True	Rarely True	No	No	Yes	No	No	Yes	No	No	No	No	Yes				Seldom	Some of the time	Seldom	Most of the time	Some of the time	Some of the time	Some of the time	Most of the time	Sometimes	Never	Daily or almost daily	Sometimes	Daily or almost daily	Sometimes
491	26	Women	highschool	no	Almost Never True	Often True	Almost Never True	Rarely True	Rarely True	Almost Never True	Rarely True	Often True	Often True	Rarely True	Almost Never True	Almost Never True	Often True	Rarely True	Rarely True	Rarely True	Almost Never True	No	No	Yes	Yes	No	No	No	No	No	Yes	Yes				Never	Never	Never	Some of the time	Seldom	Seldom	Some of the time	Some of the time	Occasionally	Occasionally	Often	Sometimes	Often	Rarely
490	40	Women	University	no	Often True	Rarely True	Rarely True	Almost Never True	Almost Never True	Rarely True	Often True	Often True	Rarely True	Almost Never True	Almost Never True	Rarely True	Almost Never True	Often True	Rarely True	Often True	Rarely True	No	No	No	Yes	No	Yes	No	No	No	Yes	Yes	Yes	No	Yes	Never		Never	Most of the time	Some of the time	Some of the time	Some of the time	Some of the time	Occasionally	Occasionally	Often	Often	Often	Often
49	24	Men	highschool	no	Rarely True	Rarely True	Rarely True	Often True	Often True	Almost Always True	Almost Always True	Almost Always True	Almost Never True	Often True	Almost Never True	Almost Always True	Almost Always True	Almost Always True	Rarely True	Almost Always True	Almost Always True	No	No	No	No	Yes	No	No	No	Yes	No	No	No			Never	Seldom	Never	Seldom	Never	Never	Never	Seldom	Never	Never	Daily or almost daily	Sometimes	Often	Often
489	20	Women	primary	no	Often True	Rarely True	Rarely True	Almost Never True	Almost Never True	Rarely True	Almost Never True	Almost Never True	Almost Always True	Almost Never True	Almost Never True	Rarely True	Almost Never True	Almost Never True	Rarely True	Rarely True	Rarely True	No	No	Yes	Yes	Yes	Yes	Yes	No	Yes	Yes	Yes		Yes		Most of the time	Seldom	Never			Seldom			Never	Never	Occasionally	Rarely	Occasionally
488	22	Women	highschool	no	Rarely True	Often True	Often True	Almost Always True	Often True	Almost Always True	Almost Always True	Almost Always True	Almost Always True	Almost Always True	Almost Never True	Often True	Often True	Almost Always True	Often True	Almost Always True	Often True	No	No	Yes	Yes	No	No	No	No	No	Yes	Yes	No	No	No	Never	Never	Never	Most of the time	Most of the time	Some of the time	Never	Most of the time	Sometimes	Rarely	Daily or almost daily	Daily or almost daily	Daily or almost daily	Often
487	22	Women	highschool	no	Often True	Almost Always True	Almost Always True	Rarely True	Often True	Almost Always True	Almost Always True	Almost Always True	Almost Always True	Almost Always True	Almost Always True	Almost Always True	Rarely True	Often True	Often True	Almost Always True	Often True	No	No	No	No	No	Yes	No	No	Yes	Yes	Yes	No	Yes		Most of the time	Some of the time	Some of the time	Most of the time	Some of the time	Some of the time	Seldom	Some of the time	Occasionally	Occasionally	Daily or almost daily	Sometimes	Daily or almost daily	Occasionally
486	22	Women	highschool	no	Often True	Often True	Rarely True	Almost Always True	Almost Always True	Often True	Almost Always True	Almost Always True	Often True	Almost Always True	Almost Never True	Often True	Rarely True	Almost Always True	Often True	Almost Always True	Often True	No	No	No	No	No	Yes	No	No	No	No	No				Never	Seldom	Never	Some of the time	Some of the time	Some of the time	Some of the time	Some of the time	Rarely	Rarely	Daily or almost daily	Daily or almost daily	Daily or almost daily	Rarely
485	20	Women	primary	no	Rarely True	Often True	Often True	Often True	Almost Never True	Almost Never True	Often True	Almost Never True	Often True	Almost Never True	Almost Never True	Almost Never True	Often True	Almost Never True	Almost Never True	Often True	Almost Never True	No	No	No	No	No	No	No	No	No	No	No	No		No	Seldom	Seldom	Never	Some of the time	Some of the time	Some of the time	Never	Some of the time	Occasionally	Occasionally	Rarely	Occasionally	Never	Occasionally
484	22	Women	highschool	no	Rarely True	Often True	Often True	Often True	Often True	Rarely True	Often True	Often True	Almost Always True	Often True	Almost Never True	Often True	Often True	Often True	Often True	Almost Always True	Almost Always True	No	No	Yes	Yes	No	Yes	Yes	No	No	Yes	Yes	No	No		Never	Never	Never	Seldom	Seldom	Most of the time	Never	Most of the time	Never	Never	Daily or almost daily	Daily or almost daily	Daily or almost daily	Sometimes
483	23	Women	highschool	no	Rarely True	Rarely True	Almost Never True	Rarely True	Rarely True	Almost Always True	Almost Always True	Almost Always True	Rarely True	Almost Always True	Almost Never True	Almost Always True	Almost Always True	Almost Always True	Almost Always True	Almost Always True	Almost Always True	No	No	Yes	Yes	Yes	Yes	Yes	No	Yes	Yes	No				Never	Never	Never	Never	Never	Most of the time	Never	Never	Never	Never	Daily or almost daily	Never	Daily or almost daily	Never
482	25	Women	highschool	no	Almost Always True	Often True	Rarely True	Often True	Often True	Almost Always True	Almost Always True	Almost Always True	Often True	Almost Always True	Almost Never True	Almost Always True	Often True	Almost Always True	Almost Always True	Almost Always True	Almost Always True	No	No	Yes	Yes	Yes	Yes	Yes	No	Yes	Yes	No				Never	Some of the time	Some of the time	Never	Seldom	Seldom	Never	Seldom	Never	Never	Occasionally	Rarely	Occasionally	Rarely
481	23	Women	highschool	no	Rarely True	Rarely True	Rarely True	Almost Always True	Almost Always True	Almost Always True	Often True	Often True	Almost Never True	Almost Always True	Almost Never True	Almost Always True	Rarely True	Almost Always True	Rarely True	Almost Always True	Often True	No	No	No	No	Yes	Yes	No	No	No	Yes	Yes	No	No		Never	Some of the time	Never	Most of the time	Seldom	Never	Seldom	Most of the time	Rarely	Never	Daily or almost daily	Sometimes	Daily or almost daily	Sometimes
480	21	Women	highschool	no	Often True	Often True	Rarely True	Almost Never True	Rarely True	Rarely True	Often True	Often True	Almost Always True	Often True	Almost Never True	Often True	Almost Never True	Rarely True	Often True	Often True	Almost Never True	No	No	No	No	No	Yes	Yes	No	No	No	Yes	No	No	No	Never	Never	Never	Most of the time	Most of the time	Most of the time	Most of the time	Most of the time	Rarely	Never	Daily or almost daily	Often	Often	Often
48	44	Women	University	no	Almost Always True	Almost Never True	Rarely True	Rarely True	Almost Always True	Rarely True	Almost Always True	Almost Always True	Often True	Almost Always True	Almost Never True	Almost Always True	Almost Never True	Often True	Almost Never True	Almost Always True	Almost Never True	No	No	No	No	No	No	No	Yes	No	No	Yes				Seldom	Seldom	Never	Some of the time	Seldom	Some of the time	Some of the time	Most of the time	Occasionally	Occasionally	Often	Sometimes	Often	Sometimes
479	22	Women	highschool	no	Often True	Rarely True	Often True	Often True	Rarely True	Often True	Often True	Almost Never True	Rarely True	Often True	Almost Never True	Often True	Rarely True	Rarely True	Rarely True	Often True	Often True	No	No	No	No	No	No	No	Yes	No	No	Yes				Never								Occasionally	Occasionally	Daily or almost daily	Often	Daily or almost daily	Daily or almost daily
478	19	Women	postgraduate	no	Almost Always True	Rarely True	Often True	Almost Never True	Almost Always True	Often True	Almost Always True	Rarely True	Often True	Almost Always True	Almost Never True	Almost Always True	Rarely True	Often True	Rarely True	Often True	Almost Never True	No	No	Yes	Yes	Yes	No	No	No	No	Yes	Yes	No	No		Seldom	Some of the time	Some of the time	Most of the time	Some of the time	Some of the time	Never	Most of the time	Occasionally	Occasionally	Daily or almost daily	Often	Often	Sometimes
477	22	Women	highschool	no	Often True	Often True	Often True	Often True	Almost Always True	Almost Never True	Almost Always True	Often True	Often True	Almost Always True	Rarely True	Almost Always True	Often True	Often True	Often True	Almost Always True	Almost Always True	No	No	Yes	Yes	Yes	No	No	No	No	Yes	No	No			Most of the time	Some of the time				Some of the time			Occasionally	Never	Never	Rarely		Occasionally
476	25	Women	highschool	no	Rarely True	Often True	Often True	Often True	Often True	Often True	Often True	Often True	Almost Never True	Often True	Almost Never True	Almost Never True	Often True	Often True	Often True	Often True	Often True	No	No	No	No	No	No	No	No	No	No	Yes	No	No	No	Never	Most of the time	Some of the time	Most of the time	Most of the time	Most of the time	Most of the time	Most of the time	Occasionally	Occasionally	Often	Sometimes	Often	Often
475	26	Women	highschool	no	Almost Always True	Rarely True	Rarely True	Rarely True	Often True	Rarely True	Almost Always True	Almost Always True	Almost Never True	Rarely True	Almost Never True	Often True	Rarely True	Almost Never True	Rarely True	Almost Always True	Rarely True	No	No	No	No	Yes	Yes	No	No	Yes	Yes	Yes	No	No		Never	Some of the time	Seldom	Most of the time	Some of the time	Some of the time	Some of the time	Some of the time	Sometimes	Sometimes	Daily or almost daily	Often	Often	Often
474	22	Women	highschool	no	Rarely True	Often True	Often True	Almost Always True	Rarely True	Almost Always True	Often True	Rarely True	Often True	Rarely True	Almost Always True	Almost Always True	Often True	Almost Always True	Rarely True	Almost Always True	Often True	No	No	No	No	No	No	No	Yes	Yes	Yes	Yes	No	Yes		Some of the time	Most of the time	Some of the time	Some of the time	Seldom	Seldom	Never	Most of the time	Rarely	Rarely	Daily or almost daily	Occasionally	Daily or almost daily	Daily or almost daily
473	22	Men	highschool	no	Almost Never True	Almost Always True	Almost Never True	Almost Always True	Almost Always True	Almost Always True	Almost Always True	Almost Never True	Often True	Almost Never True	Almost Never True	Rarely True	Almost Never True	Almost Never True	Almost Never True	Almost Always True	Almost Never True	No	No	No	Yes	Yes	Yes	Yes	No	Yes	No	Yes	No	No		Never	Some of the time	Some of the time	Some of the time	Some of the time	Some of the time	Some of the time	Some of the time	Rarely	Rarely	Rarely	Rarely	Rarely	Rarely
472	17	Women	postgraduate	no	Often True	Often True	Rarely True	Often True	Almost Always True	Often True	Almost Always True	Often True	Almost Always True	Almost Always True	Almost Never True	Almost Always True	Often True	Almost Always True	Often True	Almost Always True	Often True	No	No	No	No	No	Yes	Yes	No	No	No	No	Yes			Never	Seldom	Never	Some of the time	Seldom	Seldom	Some of the time	Seldom	Never	Rarely	Rarely	Occasionally	Occasionally	Never
471	22	Women	highschool	no	Rarely True	Often True	Often True	Often True	Almost Never True	Almost Always True	Almost Always True	Almost Always True	Almost Always True	Almost Always True	Almost Never True	Almost Never True	Almost Never True	Almost Never True	Rarely True	Rarely True	Often True	No	No	No	No	No	No	No	No	No	Yes	Yes	Yes	No	No	Never	Never	Never	Most of the time	Seldom	Seldom	Most of the time	Some of the time	Rarely	Sometimes	Daily or almost daily	Rarely	Often	Rarely
470	28	Women	University	no	Rarely True	Almost Always True	Almost Always True	Almost Always True	Almost Always True	Almost Always True	Almost Always True	Almost Always True	Often True	Almost Always True	Almost Never True	Almost Always True	Almost Always True	Often True	Rarely True	Almost Always True	Almost Always True	No	No	Yes	Yes	No	No	No	No	Yes	Yes	No	No			Most of the time	Most of the time	Some of the time	Seldom	Never	Never	Never	Some of the time	Rarely	Never	Daily or almost daily	Sometimes	Daily or almost daily	Daily or almost daily
47	36	Men	postgraduate	no	Rarely True	Rarely True	Rarely True	Often True	Rarely True	Rarely True	Often True	Rarely True	Almost Always True	Almost Always True	Almost Never True	Rarely True	Rarely True	Rarely True	Rarely True	Often True	Often True	No	No	No	No	No	Yes	No	No	No	No	Yes				Never	Seldom	Never	Most of the time	Most of the time	Some of the time	Some of the time	Some of the time	Rarely	Occasionally	Daily or almost daily	Often	Daily or almost daily	Often
469	26	Women	highschool	no	Often True	Often True	Rarely True	Rarely True	Almost Never True	Rarely True	Almost Always True	Rarely True	Rarely True	Rarely True	Almost Never True	Often True	Almost Never True	Almost Always True	Rarely True	Almost Always True	Rarely True	No	No	No	No	No	No	No	Yes	No	No	Yes				Never	Seldom	Never	Most of the time	Never	Never	Most of the time	Seldom	Often	Never	Sometimes	Sometimes	Sometimes	Sometimes
468	29	Women	University	no	Almost Never True	Almost Never True	Almost Never True	Almost Never True	Almost Never True	Almost Never True	Almost Always True	Almost Never True	Almost Never True	Almost Never True	Almost Never True	Almost Never True	Almost Never True	Almost Never True	Almost Never True	Rarely True	Almost Never True	No	No	No	No	No	No	No	No	No	No	No	No			Never	Never	Never	Most of the time	Seldom	Never	Some of the time	Some of the time	Sometimes	Sometimes	Daily or almost daily	Often	Daily or almost daily	Daily or almost daily
467	19	Women	postgraduate	no	Often True	Rarely True	Rarely True	Rarely True	Often True	Almost Never True	Almost Never True	Almost Always True	Almost Always True	Almost Always True	Almost Never True	Almost Always True	Almost Never True	Almost Never True	Rarely True	Almost Always True	Often True	No	No	Yes	Yes	Yes	Yes	Yes	No	No	No	Yes				Never	Seldom	Seldom	Some of the time	Some of the time	Some of the time	Never	Some of the time	Rarely	Rarely	Daily or almost daily	Never	Daily or almost daily	Sometimes
466	25	Women	highschool	no	Almost Always True	Rarely True	Almost Never True	Often True	Often True	Rarely True	Often True	Rarely True	Often True	Often True	Almost Never True	Rarely True	Rarely True	Rarely True	Rarely True	Often True	Rarely True	No	No	No	No	No	Yes	No	No	No	No	Yes				Never	Never	Never	Most of the time	Never		Some of the time	Some of the time	Often	Rarely	Often	Daily or almost daily	Rarely	Rarely
465	23	Women	highschool	no	Rarely True	Rarely True	Almost Never True	Rarely True	Often True	Rarely True	Almost Always True	Rarely True	Almost Always True	Often True	Almost Never True	Often True	Rarely True	Often True	Often True	Often True	Rarely True	No	No	Yes	Yes	No	Yes	No	No	No	Yes	Yes						Some of the time	Some of the time				Some of the time	Rarely	Rarely	Daily or almost daily	Daily or almost daily	Daily or almost daily	Often
464	23	Women	highschool	no	Often True	Almost Always True	Often True	Almost Always True	Rarely True	Rarely True	Rarely True	Rarely True	Rarely True	Often True	Almost Never True	Almost Always True	Often True	Almost Always True	Almost Always True	Almost Always True	Almost Always True	No	No	Yes	Yes	Yes	Yes	Yes	No	Yes	Yes	No				Never	Some of the time	Some of the time	Most of the time	Some of the time	Some of the time	Some of the time	Some of the time	Sometimes	Never	Daily or almost daily	Sometimes	Often	Often
463	18	Women	postgraduate	no	Almost Never True	Almost Never True	Rarely True	Often True	Often True	Almost Always True	Almost Always True	Almost Always True	Often True	Almost Always True	Rarely True	Often True	Rarely True	Often True	Often True	Often True	Often True	No	No	No	No	Yes	No	No	No	Yes	Yes	No	No	No	No	Never	Some of the time	Some of the time	Most of the time	Some of the time	Some of the time	Most of the time	Most of the time	Never	Never	Occasionally	Sometimes	Sometimes	Rarely
462	20	Women	primary	no	Often True	Almost Never True	Rarely True	Almost Always True	Almost Always True	Almost Never True	Almost Always True	Almost Always True	Rarely True	Almost Always True	Rarely True	Often True	Almost Always True	Almost Always True	Almost Always True	Almost Always True	Rarely True	No	No	Yes	Yes	Yes	Yes	Yes	No	No	Yes	No	No			Never	Seldom	Seldom	Most of the time	Most of the time	Most of the time	Most of the time	Most of the time	Never	Never	Sometimes	Sometimes	Sometimes	Sometimes
461	20	Women	highschool	no	Often True	Rarely True	Often True	Rarely True	Rarely True	Often True	Often True	Often True	Often True	Often True	Rarely True	Almost Always True	Often True	Rarely True	Almost Always True	Almost Always True	Often True	No	No	Yes	Yes	Yes	Yes	Yes	No	Yes	Yes	No	No	No		Never	Most of the time	Most of the time	Seldom	Never	Never	Never	Seldom	Rarely	Rarely	Daily or almost daily	Occasionally	Daily or almost daily	Rarely
460	21	Women	highschool	no	Rarely True	Rarely True	Rarely True	Rarely True	Rarely True	Rarely True	Almost Always True	Almost Always True	Rarely True	Often True	Almost Never True	Almost Always True	Almost Never True	Often True	Often True	Almost Always True	Almost Never True	No	No	Yes	Yes	No	Yes	Yes	No	Yes	Yes	Yes	No	Yes	No	Most of the time	Most of the time	Seldom	Seldom	Seldom	Some of the time	Seldom	Seldom	Never	Never	Daily or almost daily	Sometimes	Daily or almost daily	Sometimes
46	21	Women	highschool	no	Rarely True	Almost Never True	Often True	Almost Never True	Rarely True	Often True	Almost Always True	Often True	Almost Always True	Often True	Almost Never True	Often True	Almost Never True	Often True	Rarely True	Rarely True	Almost Never True	No	No	No	No	No	Yes	No	No	No	Yes	Yes	No	No		Never	Seldom	Never	Some of the time	Some of the time	Some of the time	Seldom	Some of the time	Never	Never	Daily or almost daily	Rarely	Sometimes	Sometimes
459	22	Women	highschool	no	Often True	Often True	Rarely True	Often True	Almost Always True	Often True	Almost Always True	Often True	Almost Always True	Almost Always True	Almost Never True	Almost Always True	Often True	Often True	Often True	Almost Always True	Often True	No	No	Yes	Yes	No	No	Yes	No	No	Yes	Yes	No	No		Seldom	Some of the time	Some of the time	Some of the time	Never	Never	Never	Some of the time	Rarely	Never	Daily or almost daily	Often	Daily or almost daily	Daily or almost daily
458	27	Women	secondary	no	Often True	Almost Never True	Rarely True	Almost Never True	Rarely True	Often True	Almost Never True	Almost Never True	Often True	Almost Never True	Rarely True	Rarely True	Rarely True	Rarely True	Almost Never True	Almost Never True	Almost Never True	No	No	Yes	Yes	Yes	Yes	Yes	Yes	Yes	Yes	No	Yes	Yes	Yes	Most of the time	Some of the time	Some of the time	Seldom	Seldom	Seldom	Seldom	Seldom	Rarely	Rarely	Rarely	Rarely	Rarely	Rarely
457	20	Women	highschool	no	Rarely True	Rarely True	Often True	Almost Never True	Almost Always True	Often True	Almost Always True	Almost Always True	Rarely True	Almost Always True	Almost Never True	Almost Always True	Almost Never True	Almost Always True	Almost Always True	Almost Always True	Almost Never True	No	No	No	No	No	Yes	Yes	No	No	Yes	Yes	No	No	No	Seldom	Seldom	Never	Most of the time	Never	Some of the time	Some of the time	Some of the time	Rarely	Rarely	Daily or almost daily	Daily or almost daily	Sometimes	Often
456	19	Women	postgraduate	no	Rarely True	Almost Always True	Often True	Almost Always True	Almost Always True	Often True	Rarely True	Almost Always True	Rarely True	Almost Always True	Almost Never True	Almost Always True	Often True	Almost Always True	Often True	Often True	Almost Always True	No	No	Yes	Yes	Yes	Yes	No	No	No	Yes	Yes			Yes	Never	Some of the time	Seldom	Most of the time	Some of the time	Seldom	Seldom	Most of the time	Rarely	Rarely	Daily or almost daily	Often	Daily or almost daily	Often
455	27	Women	secondary	no	Often True	Often True	Rarely True	Almost Always True	Almost Always True	Rarely True	Almost Always True	Almost Always True	Rarely True	Almost Always True	Almost Never True	Often True	Rarely True	Almost Always True	Often True	Almost Always True	Often True	No	No	No	Yes	Yes	Yes	Yes	No	Yes	Yes	Yes					Most of the time	Seldom	Seldom		Some of the time	Seldom	Some of the time	Rarely	Never	Occasionally	Often	Daily or almost daily	Sometimes
454	28	Women	University	no	Almost Always True	Rarely True	Almost Never True	Rarely True	Almost Always True	Rarely True	Almost Always True	Rarely True	Almost Always True	Almost Always True	Almost Never True	Almost Always True	Almost Never True	Almost Always True	Almost Always True	Almost Always True	Often True	No	No	Yes	No	Yes	Yes	No	No	Yes	No	No	No	Yes		Most of the time	Most of the time	Some of the time	Some of the time		Most of the time		Most of the time	Rarely	Never	Daily or almost daily	Rarely	Daily or almost daily	Sometimes
453	24	Women	postgraduate	no	Rarely True	Rarely True	Rarely True	Often True	Rarely True	Almost Always True	Almost Always True	Often True	Often True	Rarely True	Almost Never True	Often True	Often True	Almost Always True	Almost Always True	Almost Always True	Often True	No	No	Yes	Yes	Yes	Yes	Yes	No	Yes	Yes	Yes	No	No	No	Never	Some of the time	Some of the time	Most of the time	Seldom	Most of the time	Seldom	Most of the time	Never	Never	Often	Never	Daily or almost daily	Sometimes
452	30	Women	University	no	Rarely True	Rarely True	Often True	Rarely True	Rarely True	Often True	Often True	Often True	Often True	Rarely True	Almost Never True	Often True	Rarely True	Rarely True	Rarely True	Often True	Rarely True	No	No	No	No	No	No	Yes	No	No	No	Yes				Never	Some of the time	Never	Seldom	Never	Never	Seldom	Some of the time	Sometimes	Sometimes	Daily or almost daily	Sometimes	Daily or almost daily	Often
451	23	Women	highschool	no	Often True	Rarely True	Almost Never True	Rarely True	Almost Never True	Rarely True	Almost Never True	Almost Never True	Almost Always True	Rarely True	Almost Never True	Rarely True	Almost Never True	Rarely True	Rarely True	Rarely True	Rarely True	No	No	No	No	Yes	Yes	No	No	Yes	Yes	No	No	Yes	No	Never	Never	Never	Some of the time	Some of the time	Some of the time	Never	Some of the time	Rarely	Never	Daily or almost daily	Rarely	Never	Often
450	19	Women	postgraduate	no	Often True	Rarely True	Rarely True	Rarely True	Almost Always True	Rarely True	Almost Always True	Rarely True	Often True	Almost Always True	Almost Never True	Almost Always True	Rarely True	Often True	Rarely True	Almost Always True	Rarely True	No	No	Yes	No	No	No	No	No	No	No	No	No	No	No	Seldom	Never	Never	Some of the time	Seldom	Seldom	Never	Some of the time	Rarely	Never	Daily or almost daily	Daily or almost daily	Often	Sometimes
45	22	Women	highschool	no	Rarely True	Almost Never True	Almost Never True	Rarely True	Rarely True	Rarely True	Almost Never True	Almost Never True	Almost Always True	Almost Never True	Almost Never True	Almost Always True	Almost Never True	Almost Always True	Almost Always True	Almost Always True	Almost Never True	No	No	Yes	Yes	Yes	No	Yes	No	No	Yes	No				Never	Never	Never	Most of the time	Seldom	Seldom	Seldom	Most of the time	Never	Never	Often	Sometimes	Often	Never
449	24	Women	highschool	no	Rarely True	Often True	Often True	Often True	Almost Never True	Rarely True	Almost Always True	Almost Always True	Almost Never True	Almost Never True	Almost Never True	Almost Always True	Almost Never True	Often True	Rarely True	Often True	Often True	No	No	No	No	No	Yes	No	No	Yes	Yes	No	No			Seldom	Some of the time	Never	Some of the time	Never	Seldom	Most of the time	Some of the time	Occasionally	Never	Daily or almost daily	Occasionally	Daily or almost daily	Daily or almost daily
448	25	Women	postgraduate	no	Almost Never True	Rarely True	Often True	Rarely True	Rarely True	Rarely True	Almost Always True	Rarely True	Rarely True	Often True	Almost Never True	Often True	Rarely True	Rarely True	Often True	Often True	Rarely True	No	No	Yes	Yes	No	No	Yes	No	No	Yes	Yes	No	No	Yes	Never	Seldom	Seldom	Some of the time	Some of the time	Some of the time	Some of the time	Some of the time	Occasionally	Rarely	Daily or almost daily	Occasionally	Daily or almost daily	Often
447	19	Women	postgraduate	no	Often True	Often True	Often True	Often True	Often True	Almost Always True	Almost Always True	Rarely True	Often True	Often True	Rarely True	Often True	Rarely True	Often True	Often True	Often True	Often True	No	No	No	No	Yes	Yes	No	No	Yes	Yes	Yes	Yes	No		Seldom	Seldom	Never	Most of the time	Never	Never	Some of the time	Most of the time	Sometimes	Rarely	Daily or almost daily	Rarely	Daily or almost daily	Occasionally
446	22	Women	highschool	no	Almost Always True	Rarely True	Rarely True	Rarely True	Rarely True	Rarely True	Often True	Almost Never True	Almost Never True	Often True	Almost Never True	Often True	Almost Never True	Almost Never True	Rarely True	Almost Always True	Rarely True	No	No	Yes	Yes	Yes	Yes	Yes	No	No	No	Yes	Yes	No		Never	Never	Never	Most of the time	Never	Never	Most of the time	Most of the time	Sometimes	Sometimes	Daily or almost daily	Daily or almost daily	Never	Never
445	25	Women	highschool	no	Rarely True	Often True	Rarely True	Often True	Rarely True	Almost Always True	Almost Always True	Almost Always True	Almost Never True	Rarely True	Almost Never True	Rarely True	Almost Never True	Almost Never True	Rarely True	Almost Always True	Often True	No	No	No	No	Yes	No	No	No	No	No	Yes	No	No	Yes	Never	Never	Never	Most of the time	Seldom	Seldom	Most of the time	Most of the time	Sometimes	Never	Daily or almost daily	Sometimes	Daily or almost daily	Often
444	21	Women	highschool	no	Almost Always True	Rarely True	Rarely True	Rarely True	Often True	Often True	Often True	Almost Never True	Almost Always True	Often True	Often True	Almost Always True	Almost Always True	Almost Always True	Almost Always True	Almost Always True	Almost Always True	No	No	Yes	Yes	Yes	Yes	Yes	No	Yes	Yes	Yes	No	Yes	No	Some of the time	Most of the time	Most of the time	Most of the time	Most of the time	Most of the time	Most of the time	Most of the time	Sometimes	Sometimes	Daily or almost daily	Sometimes	Often	Never
443	19	Women	postgraduate	no	Often True	Often True	Rarely True	Often True	Almost Always True	Rarely True	Often True	Often True	Almost Always True	Almost Always True	Almost Never True	Often True	Rarely True	Often True	Often True	Often True	Often True	No	No	No	No	Yes	Yes	Yes	No	Yes	Yes	Yes	No	No		Seldom	Seldom	Never	Seldom	Some of the time	Never	Some of the time	Some of the time	Occasionally	Rarely	Daily or almost daily	Never	Daily or almost daily	Daily or almost daily
442	24	Women	highschool	no	Often True	Rarely True	Rarely True	Rarely True	Often True	Rarely True	Almost Always True	Rarely True	Almost Always True	Almost Always True	Almost Never True	Often True	Rarely True	Often True	Often True	Often True	Rarely True	No	No	No	No	No	Yes	Yes	No	Yes	Yes	No	No	No	No	Never	Seldom	Never	Seldom	Never	Most of the time	Seldom	Some of the time	Occasionally	Never	Daily or almost daily	Often	Often	Often
441	29	Women	University	no	Rarely True	Rarely True	Often True	Rarely True	Almost Always True	Almost Never True	Almost Always True	Often True	Almost Always True	Rarely True	Often True	Often True	Often True	Rarely True	Rarely True	Often True	Often True	No	No	No	No	No	No	No	No	No	No	Yes							Most of the time			Some of the time	Most of the time	Never	Never	Daily or almost daily	Never	Daily or almost daily	Never
440	23	Women	highschool	no	Often True	Often True	Almost Always True	Almost Always True	Almost Always True	Almost Always True	Almost Always True	Almost Always True	Almost Always True	Rarely True	Almost Never True	Almost Always True	Rarely True	Almost Always True	Almost Always True	Almost Always True	Often True	No	No	Yes	Yes	Yes	No	Yes	No	No	Yes	Yes	No	Yes		Seldom	Seldom	Seldom	Most of the time	Most of the time	Seldom	Most of the time	Most of the time	Rarely	Occasionally	Daily or almost daily	Rarely	Daily or almost daily	Daily or almost daily
44	39	Women	postgraduate	no	Rarely True	Rarely True	Often True	Rarely True	Often True	Rarely True	Often True	Rarely True	Often True	Almost Always True	Almost Never True	Often True	Rarely True	Often True	Often True	Often True	Often True	No	No	Yes	No	Yes	Yes	No	No	Yes	No	Yes	No	No	No	Never	Seldom	Seldom	Most of the time	Seldom	Seldom	Some of the time	Most of the time	Never	Never	Daily or almost daily	Sometimes	Daily or almost daily	Often
439	30	Women	University	no	Rarely True	Often True	Almost Never True	Rarely True	Often True	Rarely True	Almost Always True	Rarely True	Almost Always True	Often True	Almost Never True	Often True	Rarely True	Often True	Often True	Often True	Rarely True	No	No	Yes	Yes	Yes	Yes	Yes	No	Yes	Yes	Yes	Yes			Never	Some of the time	Never	Some of the time	Seldom	Seldom	Some of the time	Some of the time	Occasionally	Rarely	Daily or almost daily	Sometimes		Sometimes
438	22	Women	highschool	no	Rarely True	Almost Never True	Almost Never True	Often True	Rarely True	Almost Never True	Often True	Almost Never True	Often True	Almost Never True	Almost Never True	Often True	Almost Never True	Often True	Rarely True	Often True	Rarely True	No	No	No	No	Yes	Yes	Yes	No	No	No	Yes	Yes						Most of the time		Most of the time	Most of the time	Most of the time	Rarely	Sometimes	Daily or almost daily	Rarely	Daily or almost daily	Sometimes
437	21	Women	highschool	no	Often True	Almost Never True	Almost Never True	Almost Never True	Almost Never True	Almost Never True	Almost Always True	Almost Always True	Often True	Almost Always True	Often True	Rarely True	Often True	Almost Always True	Almost Always True	Almost Always True	Almost Never True	No	No	Yes	Yes	Yes	Yes	Yes	No	Yes	Yes	Yes	Yes	Yes	No	Most of the time	Most of the time	Most of the time	Some of the time	Some of the time	Some of the time	Most of the time	Some of the time	Often	Often	Daily or almost daily	Often	Often	Often
436	22	Women	highschool	no	Often True	Often True	Often True	Often True	Often True	Rarely True	Often True	Rarely True	Almost Always True	Often True	Almost Never True	Almost Always True	Often True	Often True	Often True	Almost Always True	Often True	No	No	Yes	No	Yes	Yes	No	No	Yes	No	No	No						Most of the time					Rarely	Rarely	Daily or almost daily	Sometimes	Daily or almost daily	Rarely
435	40	Men	University	no	Often True	Rarely True	Rarely True	Rarely True	Often True	Almost Never True	Almost Always True	Almost Never True	Rarely True	Rarely True	Almost Never True	Often True	Often True	Rarely True	Rarely True	Rarely True	Often True	No	No	No	No	No	Yes	No	No	No	No	Yes	No	No	Yes	Never	Some of the time	Never	Most of the time	Some of the time	Never	Never	Some of the time	Occasionally	Rarely	Daily or almost daily	Sometimes	Daily or almost daily	Sometimes
434	56	Women	University	no	Rarely True	Rarely True	Almost Always True	Often True	Almost Always True	Almost Always True	Almost Always True	Almost Always True	Rarely True	Almost Always True	Almost Never True	Often True	Rarely True	Almost Always True	Rarely True	Almost Always True	Rarely True	No	No	No	No	No	No	No	Yes	No	No	Yes				Never	Never	Never	Most of the time	Never	Most of the time	Never	Most of the time	Rarely	Rarely	Often	Daily or almost daily	Daily or almost daily	Often
433	64	Men	University	no	Almost Always True	Rarely True	Often True	Often True	Rarely True	Rarely True	Often True	Rarely True	Often True	Rarely True	Almost Never True	Often True	Rarely True	Often True	Often True	Often True	Often True	No	No	Yes	Yes	No	Yes	Yes	No	Yes	No	No	No			Never	Most of the time	Some of the time						Rarely	Never	Daily or almost daily	Sometimes	Daily or almost daily	Sometimes
432	64	Women	University	no	Rarely True	Almost Always True	Often True	Almost Always True	Often True	Often True	Almost Always True	Often True	Rarely True	Rarely True	Almost Never True	Almost Always True	Rarely True	Often True	Almost Always True	Almost Always True	Almost Never True	No	No	Yes	Yes	Yes	No	No	No	No	Yes	No	No		Yes	Never	Most of the time	Seldom	Some of the time	Never	Some of the time	Some of the time	Some of the time	Rarely	Never	Daily or almost daily	Occasionally	Daily or almost daily	Often
431	23	Women	highschool	no	Often True	Almost Always True	Often True	Often True	Often True	Rarely True	Almost Never True	Often True	Rarely True	Rarely True	Almost Never True	Almost Always True	Rarely True	Rarely True	Rarely True	Almost Always True	Rarely True	No	No	Yes	Yes	Yes	Yes	Yes	No	Yes	Yes	No	No	Yes		Most of the time	Most of the time	Most of the time	Seldom	Never	Some of the time	Never	Never	Never	Never	Daily or almost daily	Rarely	Often	Sometimes
430	33	Women	University	no	Rarely True	Rarely True	Rarely True	Often True	Rarely True	Rarely True	Almost Always True	Often True	Often True	Almost Never True	Almost Never True	Almost Always True	Rarely True	Often True	Often True	Often True	Rarely True	No	No	Yes	Yes	Yes	No	Yes	No	No	Yes	No				Never	Most of the time	Seldom	Some of the time	Some of the time	Some of the time	Seldom	Some of the time	Rarely	Never	Daily or almost daily	Daily or almost daily	Daily or almost daily	Sometimes
43	41	Women	University	no	Often True	Often True	Often True	Often True	Almost Always True	Almost Always True	Almost Always True	Almost Always True	Almost Always True	Almost Always True	Almost Never True	Often True	Almost Never True	Often True	Rarely True	Almost Always True	Often True	No	No	No	Yes	Yes	No	No	No	Yes	Yes	Yes	No	No		Seldom	Seldom	Some of the time	Most of the time	Seldom	Never	Some of the time	Most of the time	Rarely	Never	Daily or almost daily	Never	Daily or almost daily	Sometimes
429	23	Women	postgraduate	no	Almost Never True	Rarely True	Almost Always True	Often True	Rarely True	Rarely True	Almost Always True	Rarely True	Almost Always True	Often True	Almost Never True	Often True	Often True	Often True	Almost Always True	Almost Always True	Rarely True	No	No	Yes	Yes	Yes	Yes	Yes	No	No	Yes	Yes	Yes	No	Yes	Never	Seldom	Seldom	Most of the time	Most of the time	Most of the time	Most of the time	Most of the time	Rarely	Rarely	Daily or almost daily	Occasionally	Often	Sometimes
428	27	Women	University	no	Almost Always True	Rarely True	Almost Never True	Often True	Rarely True	Rarely True	Almost Always True	Often True	Almost Always True	Often True	Almost Never True	Rarely True	Rarely True	Rarely True	Rarely True	Often True	Rarely True	No	No	Yes	Yes	No	No	No	No	No	No	No		No		Seldom	Seldom		Seldom			Seldom	Seldom	Sometimes	Sometimes	Often	Daily or almost daily	Sometimes	Often
427	32	Women	University	no	Often True	Almost Always True	Almost Always True	Almost Always True	Almost Always True	Almost Always True	Almost Always True	Almost Always True	Almost Always True	Almost Always True	Almost Never True	Rarely True	Almost Always True	Almost Always True	Almost Always True	Almost Always True	Almost Always True	No	No	Yes	Yes	Yes	Yes	No	No	No	Yes	Yes	Yes	No		Seldom	Never	Never	Most of the time	Most of the time	Most of the time	Most of the time	Most of the time	Never	Never	Daily or almost daily	Occasionally	Daily or almost daily	Sometimes
426	25	Men	highschool	no	Almost Always True	Rarely True	Almost Never True	Almost Never True	Rarely True	Almost Never True	Rarely True	Almost Always True	Almost Always True	Rarely True	Almost Never True	Rarely True	Rarely True	Often True	Often True	Often True	Rarely True	No	No	No	No	No	No	No	Yes	Yes	Yes	No	No	Yes	Yes	Seldom	Some of the time	Some of the time	Seldom	Seldom	Seldom	Never	Seldom	Rarely	Rarely	Daily or almost daily	Often	Daily or almost daily	Daily or almost daily
425	22	Women	highschool	no	Rarely True	Almost Never True	Almost Never True	Rarely True	Rarely True	Almost Never True	Often True	Almost Never True	Almost Always True	Almost Never True	Almost Never True	Rarely True	Almost Never True	Often True	Rarely True	Often True	Almost Never True	No	No	Yes	Yes	No	Yes	No	No	No	Yes	Yes	No	No		Never	Seldom	Seldom	Some of the time	Seldom	Some of the time	Seldom	Seldom	Rarely	Occasionally	Sometimes	Sometimes	Never	Occasionally
424	21	Women	highschool	no	Often True	Rarely True	Often True	Often True	Often True	Rarely True	Almost Always True	Almost Never True	Almost Always True	Often True	Almost Never True	Often True	Often True	Often True	Almost Always True	Almost Always True	Often True	No	No	Yes	Yes	Yes	Yes	No	No	No	Yes	No	Yes			Never	Most of the time	Never	Some of the time	Seldom	Seldom	Never	Never	Rarely	Never	Sometimes	Often	Often	Rarely
423	23	Women	University	no	Rarely True	Rarely True	Almost Never True	Rarely True	Rarely True	Almost Never True	Almost Never True	Almost Never True	Almost Always True	Almost Never True	Almost Never True	Often True	Almost Always True	Almost Always True	Often True	Almost Always True	Often True	No	No	Yes	Yes	Yes	Yes	Yes	No	No	Yes	No	No	Yes		Some of the time	Seldom	Never	Some of the time	Never	Never	Never	Most of the time	Rarely	Occasionally	Daily or almost daily	Never	Daily or almost daily	Rarely
422	24	Women	highschool	no	Often True	Rarely True	Rarely True	Often True	Often True	Often True	Often True	Rarely True	Almost Never True	Often True	Almost Never True	Often True	Often True	Often True	Often True	Often True	Often True	No	No	Yes	Yes	No	Yes	No	No	No	Yes	Yes				Never	Most of the time	Never	Some of the time	Some of the time	Never	Some of the time	Some of the time	Rarely	Rarely	Daily or almost daily	Occasionally	Daily or almost daily	Rarely
421	24	Women	highschool	no	Often True	Often True	Rarely True	Often True	Rarely True	Rarely True	Often True	Rarely True	Rarely True	Rarely True	Almost Never True	Rarely True	Often True	Often True	Often True	Often True	Often True	No	No	Yes	Yes	Yes	No	No	No	No	Yes	Yes							Most of the time				Some of the time	Rarely	Never	Daily or almost daily	Rarely	Daily or almost daily	Often
420	22	Women	highschool	no	Almost Never True	Rarely True	Rarely True	Often True	Often True	Rarely True	Rarely True	Rarely True	Rarely True	Often True	Almost Never True	Almost Always True	Rarely True	Often True	Often True	Almost Always True	Rarely True	No	No	Yes	Yes	No	No	Yes	No	No	Yes	Yes	No	No	No	Seldom	Some of the time	Never	Most of the time	Most of the time	Most of the time	Most of the time	Most of the time	Sometimes	Sometimes	Often	Sometimes	Often	Often
42	44	Women	University	no	Often True	Rarely True	Rarely True	Rarely True	Often True	Often True	Almost Always True	Often True	Almost Always True	Often True	Almost Never True	Often True	Rarely True	Often True	Often True	Often True	Often True	No	No	No	No	No	Yes	No	Yes	Yes	Yes	No	No	No	No	Never	Some of the time	Never	Never	Never	Never	Never	Never	Never	Never	Daily or almost daily	Occasionally	Daily or almost daily	Sometimes
419	21	Women	highschool	no	Almost Always True	Almost Always True	Often True	Almost Always True	Almost Never True	Often True	Often True	Almost Never True	Almost Always True	Almost Never True	Almost Always True	Often True	Almost Always True	Almost Always True	Almost Always True	Rarely True	Almost Always True	No	No	No	No	Yes	Yes	Yes	No	Yes	Yes	No	No	Yes	No	Seldom	Seldom	Some of the time		Some of the time	Seldom	Some of the time	Never	Sometimes	Never	Daily or almost daily	Often	Sometimes	Sometimes
418	23	Men	highschool	no	Almost Always True	Rarely True	Almost Always True	Rarely True	Often True	Often True	Almost Always True	Often True	Almost Always True	Often True	Almost Never True	Often True	Rarely True	Often True	Often True	Often True	Often True	No	No	No	No	Yes	Yes	No	No	No	Yes	Yes	No	No	No	Never	Some of the time	Seldom	Some of the time	Some of the time	Some of the time	Some of the time	Some of the time	Rarely	Never	Daily or almost daily	Often	Daily or almost daily	Often
417	34	Women	University	no	Rarely True	Almost Always True	Often True	Almost Always True	Often True	Often True	Almost Always True	Almost Always True	Often True	Almost Always True	Almost Never True	Almost Always True	Almost Always True	Almost Always True	Almost Always True	Almost Always True	Often True	No	No	Yes	Yes	No	Yes	No	No	Yes	No	Yes				Most of the time	Most of the time	Most of the time	Some of the time	Never	Never	Never	Some of the time	Rarely	Never	Sometimes	Often	Daily or almost daily	Rarely
416	32	Women	University	no	Often True	Rarely True	Rarely True	Rarely True	Rarely True	Often True	Almost Always True	Often True	Often True	Almost Always True	Almost Never True	Rarely True	Almost Never True	Often True	Rarely True	Rarely True	Often True	No	No	Yes	Yes	Yes	Yes	Yes	No	No	No	No	Yes			Seldom	Seldom	Never	Most of the time	Never	Some of the time	Some of the time	Some of the time	Occasionally	Rarely	Often	Sometimes	Often	Sometimes
415	41	Women	postgraduate	no	Often True	Rarely True	Rarely True	Almost Always True	Often True	Often True	Almost Always True	Often True	Almost Always True	Often True	Often True	Often True	Rarely True	Often True	Often True	Almost Always True	Often True	No	No	Yes	No	No	Yes	Yes	No	Yes	Yes	Yes				Seldom	Some of the time	Never	Some of the time	Some of the time	Some of the time	Never	Some of the time	Never	Never	Daily or almost daily	Occasionally	Often	Sometimes
414	28	Women	University	no	Almost Never True	Often True	Often True	Almost Always True	Almost Always True	Often True	Almost Always True	Almost Always True	Almost Always True	Often True	Almost Never True	Rarely True	Rarely True	Rarely True	Often True	Rarely True	Often True	No	No	Yes	Yes	Yes	No	Yes	No	No	Yes	Yes				Never		Seldom	Most of the time	Most of the time	Most of the time	Most of the time	Most of the time	Often	Sometimes	Daily or almost daily	Often	Daily or almost daily	Sometimes
413	42	Women	University	no	Often True	Often True	Rarely True	Almost Never True	Almost Never True	Almost Always True	Often True	Rarely True	Rarely True	Almost Always True	Almost Never True	Almost Never True	Almost Never True	Almost Never True	Almost Never True	Almost Always True	Almost Never True	No	No	No	No	No	No	No	No	No	No	No	No		No	Never	Never	Never	Some of the time	Never	Some of the time	Most of the time	Most of the time	Never	Never	Never	Occasionally	Never	Never
412	38	Women	University	no	Rarely True	Often True	Almost Always True	Almost Never True	Almost Never True	Rarely True	Almost Always True	Almost Always True	Often True	Almost Always True	Rarely True	Almost Always True	Rarely True	Almost Always True	Almost Always True	Often True	Rarely True	No	No	Yes	Yes	No	Yes	Yes	No	Yes	Yes	No	No	Yes		Most of the time	Seldom	Most of the time	Seldom	Seldom	Seldom	Never	Never	Never	Never	Daily or almost daily	Daily or almost daily	Daily or almost daily	Daily or almost daily
411	40	Men	University	no	Often True	Rarely True	Rarely True	Rarely True	Almost Always True	Often True	Almost Always True	Almost Always True	Rarely True	Almost Always True	Almost Never True	Often True	Almost Never True	Often True	Rarely True	Almost Always True	Rarely True	No	No	No	No	Yes	No	No	No	No	No	Yes				Seldom	Some of the time	Never	Some of the time	Some of the time	Never	Never	Some of the time	Rarely	Never	Daily or almost daily	Sometimes	Daily or almost daily	Sometimes
410	28	Women	University	no	Rarely True	Often True	Almost Never True	Rarely True	Often True	Rarely True	Often True	Often True	Almost Always True	Almost Always True	Almost Never True	Rarely True	Rarely True	Rarely True	Rarely True	Almost Always True	Often True	No	No	No	No	No	No	No	Yes	No	No	No	No	No	No	Never	Seldom	Never	Most of the time	Some of the time	Some of the time	Some of the time	Most of the time	Sometimes	Sometimes	Often	Daily or almost daily	Often	Often
41	22	Men	highschool	no	Rarely True	Often True	Often True	Often True	Often True	Often True	Often True	Often True	Rarely True	Often True	Almost Always True	Almost Always True	Almost Always True	Almost Always True	Almost Always True	Almost Always True	Almost Always True	No	No	No	No	No	Yes	Yes	Yes	No	Yes	Yes	Yes	Yes	Yes	Seldom	Seldom	Seldom	Seldom	Seldom	Seldom	Seldom	Seldom	Rarely	Rarely	Rarely	Rarely		Rarely
409	22	Women	highschool	no	Often True	Almost Always True	Often True	Almost Always True	Rarely True	Almost Always True	Often True	Often True	Rarely True	Often True	Almost Never True	Rarely True	Rarely True	Rarely True	Rarely True	Often True	Often True	No	No	No	No	No	No	No	No	No	No	No	No			Never	Never	Never	Some of the time	Never	Some of the time	Never	Some of the time	Rarely	Never	Daily or almost daily	Daily or almost daily	Often	Occasionally
408	25	Women	highschool	no	Almost Always True	Often True	Rarely True	Almost Never True	Rarely True	Rarely True	Almost Always True	Rarely True	Often True	Almost Always True	Almost Never True	Rarely True	Rarely True	Rarely True	Almost Always True	Almost Always True	Almost Always True	No	No	No	No	No	Yes	Yes	No	Yes	Yes	Yes				Never	Some of the time	Never	Most of the time	Seldom	Most of the time	Most of the time	Most of the time	Rarely	Rarely	Daily or almost daily	Rarely	Daily or almost daily	Sometimes
407	32	Women	University	no	Often True	Rarely True	Rarely True	Almost Never True	Rarely True	Rarely True	Often True	Rarely True	Almost Never True	Often True	Almost Never True	Almost Always True	Almost Never True	Often True	Often True	Almost Always True	Almost Never True	No	No	No	Yes	No	Yes	Yes	No	Yes	Yes	No	No	No		Never	Most of the time	Most of the time	Some of the time	Never	Seldom	Never	Some of the time	Rarely	Rarely	Daily or almost daily	Often	Daily or almost daily	Often
406	23	Women	postgraduate	no	Almost Always True	Often True	Often True	Almost Always True	Almost Always True	Often True	Often True	Often True	Rarely True	Rarely True	Almost Never True	Often True	Rarely True	Often True	Often True	Almost Always True	Rarely True	No	No	Yes	Yes	No	Yes	Yes	No	Yes	Yes	No	No	Yes		Seldom	Some of the time	Some of the time	Some of the time	Seldom	Seldom	Never	Most of the time	Rarely	Never	Daily or almost daily	Daily or almost daily	Often	Never
405	37	Women	University	no	Rarely True	Often True	Often True	Often True	Often True	Often True	Often True	Rarely True	Rarely True	Often True	Almost Never True	Almost Always True	Rarely True	Often True	Often True	Often True	Often True	No	No	No	No	No	No	No	Yes	No	No	No	No	No	No	Some of the time	Some of the time	Some of the time	Seldom	Seldom	Some of the time	Never	Seldom	Rarely	Never	Daily or almost daily	Daily or almost daily	Sometimes	Often
404	38	Women	postgraduate	no	Often True	Rarely True	Rarely True	Often True	Often True	Rarely True	Rarely True	Often True	Almost Always True	Almost Always True	Almost Never True	Rarely True	Often True	Rarely True	Rarely True	Often True	Rarely True	No	No	No	No	No	No	No	No	No	No	Yes			Yes	Never	Seldom	Never	Most of the time	Most of the time	Most of the time	Most of the time	Most of the time	Occasionally	Occasionally	Sometimes	Daily or almost daily	Sometimes	Sometimes
403	45	Women	University	no	Almost Always True	Almost Always True	Often True	Almost Always True	Often True	Almost Always True	Almost Always True	Almost Always True	Almost Always True	Rarely True	Almost Never True	Rarely True	Rarely True	Almost Never True	Almost Never True	Rarely True	Rarely True	No	No	Yes	Yes	No	Yes	Yes	No	No	Yes	Yes	No	No		Seldom	Some of the time	Seldom	Most of the time	Seldom	Seldom	Some of the time	Most of the time	Rarely	Rarely	Daily or almost daily	Sometimes	Daily or almost daily	Sometimes
402	22	Women	highschool	no	Almost Never True	Rarely True	Rarely True	Often True	Often True	Often True	Almost Always True	Often True	Often True	Often True	Almost Never True	Almost Always True	Rarely True	Often True	Often True	Often True	Often True	No	No	Yes	Yes	Yes	No	No	No	No	Yes	Yes	No	No		Never	Never	Never	Most of the time	Some of the time	Most of the time	Some of the time	Most of the time	Rarely	Never	Daily or almost daily	Daily or almost daily	Daily or almost daily	Often
401	27	Men	secondary	no	Often True	Rarely True	Often True	Often True	Often True	Often True	Almost Always True	Often True	Often True	Often True	Almost Always True	Often True	Rarely True	Rarely True	Rarely True	Often True	Rarely True	No	No	No	Yes	No	No	No	No	No	Yes	Yes	No	No		Never	Some of the time	Seldom	Most of the time	Some of the time	Seldom	Seldom	Most of the time	Sometimes	Rarely	Often	Sometimes	Often	Often
400	22	Women	highschool	no	Rarely True	Rarely True	Often True	Often True	Rarely True	Often True	Often True	Often True	Almost Always True	Often True	Almost Never True	Often True	Rarely True	Often True	Rarely True	Almost Always True	Often True	No	No	No	No	No	No	No	Yes	Yes	Yes	Yes				Never	Most of the time	Seldom	Most of the time	Some of the time	Some of the time	Some of the time	Most of the time	Rarely	Rarely	Daily or almost daily	Sometimes	Often	Never
40	31	Women	University	no	Rarely True	Often True	Often True	Often True	Often True	Often True	Often True	Often True	Almost Always True	Often True	Almost Never True	Rarely True	Rarely True	Rarely True	Rarely True	Rarely True	Rarely True	No	No	Yes	Yes	Yes	Yes	Yes	No	Yes	Yes	Yes	Yes			Never	Seldom	Never	Most of the time	Some of the time	Some of the time	Some of the time	Some of the time	Occasionally	Occasionally	Occasionally	Occasionally	Occasionally	Occasionally
4	21	Women	highschool	no	Often True	Almost Always True	Rarely True	Almost Never True	Almost Never True	Almost Never True	Almost Never True	Almost Never True	Almost Always True	Almost Never True	Almost Never True	Almost Never True	Almost Never True	Almost Never True	Almost Never True	Almost Never True	Almost Never True	No	No	No	No	No	No	No	No	No	Yes	No	No	No	No	Never	Never	Never	Seldom	Never	Some of the time	Never	Seldom	Rarely	Rarely	Occasionally	Occasionally	Rarely	Never
399	25	Men	highschool	no	Rarely True	Rarely True	Rarely True	Rarely True	Rarely True	Rarely True	Often True	Rarely True	Almost Always True	Often True	Rarely True	Often True	Often True	Rarely True	Often True	Often True	Often True	No	No	Yes	Yes	Yes	No	No	No	No	Yes	Yes	No	No		Never	Seldom		Most of the time	Some of the time	Some of the time	Seldom	Most of the time	Occasionally	Sometimes	Daily or almost daily	Sometimes	Often	Sometimes
398	39	Women	University	no	Rarely True	Often True	Almost Always True	Often True	Almost Always True	Often True	Often True	Almost Always True	Rarely True	Almost Always True	Almost Never True	Almost Always True	Often True	Often True	Often True	Almost Always True	Often True	No	No	Yes	Yes	Yes	No	No	No	Yes	No	Yes	No	Yes		Seldom	Some of the time	Never	Some of the time	Never	Some of the time	Never	Most of the time	Rarely	Never	Daily or almost daily	Often	Daily or almost daily	Rarely
397	29	Women	University	no	Rarely True	Rarely True	Rarely True	Often True	Often True	Often True	Almost Always True	Often True	Almost Never True	Often True	Almost Never True	Often True	Rarely True	Often True	Rarely True	Often True	Almost Never True	No	No	No	No	No	No	No	No	No	No	Yes				Never	Some of the time	Never	Most of the time	Never	Some of the time	Most of the time	Most of the time	Often	Sometimes	Daily or almost daily	Rarely	Often	Rarely
396	23	Women	highschool	no	Often True	Often True	Often True	Often True	Rarely True	Rarely True	Almost Always True	Almost Never True	Almost Always True	Often True	Almost Never True	Rarely True	Often True	Rarely True	Rarely True	Often True	Almost Always True	No	No	No	No	No	No	No	Yes	No	No	No	No	No	No	Never	Some of the time	Never	Some of the time	Seldom	Seldom	Some of the time	Some of the time	Rarely	Never	Daily or almost daily	Sometimes	Daily or almost daily	Sometimes
395	34	Women	postgraduate	no	Rarely True	Almost Always True	Often True	Almost Never True	Often True	Almost Never True	Almost Always True	Rarely True	Rarely True	Almost Always True	Almost Never True	Almost Always True	Almost Always True	Almost Always True	Almost Always True	Almost Always True	Almost Always True	No	No	Yes	Yes	Yes	Yes	No	No	Yes	Yes	Yes	No	No		Never	Most of the time	Seldom	Most of the time	Never	Seldom	Some of the time	Some of the time	Often	Rarely	Daily or almost daily	Often	Daily or almost daily	Never
394	47	Men	University	no	Often True	Almost Never True	Often True	Rarely True	Almost Always True	Often True	Almost Always True	Often True	Rarely True	Almost Always True	Almost Never True	Almost Always True	Often True	Often True	Almost Always True	Almost Always True	Rarely True	No	No	Yes	Yes	No	Yes	Yes	No	Yes	Yes	No	No	Yes		Most of the time	Most of the time	Some of the time	Some of the time	Seldom	Most of the time	Never	Some of the time	Rarely	Never	Daily or almost daily	Sometimes	Daily or almost daily	Sometimes
393	30	Men	University	no	Rarely True	Almost Never True	Almost Never True	Almost Never True	Almost Never True	Almost Always True	Almost Always True	Almost Always True	Almost Always True	Often True	Often True	Almost Always True	Rarely True	Often True	Often True	Almost Always True	Rarely True	No	No	Yes	Yes	Yes	Yes	Yes	No	No	Yes	Yes	Yes	Yes		Most of the time	Never	Never	Most of the time		Most of the time	Never	Most of the time	Never	Never	Daily or almost daily	Sometimes	Daily or almost daily	Occasionally
392	20	Women	postgraduate	no	Rarely True	Often True	Often True	Often True	Often True	Often True	Often True	Often True	Often True	Often True	Almost Never True	Often True	Often True	Often True	Often True	Often True	Often True	No	No	Yes	Yes	Yes	Yes	No	No	Yes	Yes	Yes	No	No	No	Never	Some of the time	Some of the time	Some of the time	Some of the time	Some of the time	Some of the time	Seldom	Never	Never	Daily or almost daily	Daily or almost daily	Daily or almost daily	Rarely
391	54	Men	postgraduate	no	Often True	Often True	Rarely True	Often True	Rarely True	Rarely True	Almost Always True	Rarely True	Rarely True	Almost Always True	Almost Never True	Often True	Rarely True	Almost Always True	Often True	Almost Always True	Rarely True	No	No	Yes	Yes	Yes	Yes	Yes	No	Yes	Yes	Yes	No	No		Never	Never	Never	Most of the time	Most of the time	Most of the time	Never	Most of the time	Occasionally	Sometimes	Daily or almost daily		Daily or almost daily	Sometimes
390	20	Women	highschool	no	Often True	Rarely True	Rarely True	Often True	Rarely True	Rarely True	Almost Always True	Rarely True	Almost Always True	Rarely True	Rarely True	Almost Never True	Rarely True	Rarely True	Rarely True	Almost Always True	Rarely True	No	No	No	No	No	No	No	No	No	No	Yes	Yes	No		Seldom	Never	Never	Most of the time	Seldom	Seldom	Most of the time	Seldom	Daily or almost daily	Often	Often	Daily or almost daily	Sometimes	Often
39	36	Women	University	no	Almost Never True	Often True	Almost Always True	Rarely True	Almost Always True	Rarely True	Often True	Rarely True	Rarely True	Almost Always True	Almost Never True	Almost Always True	Often True	Rarely True	Rarely True	Almost Always True	Rarely True	No	No	No	No	No	No	No	Yes	No	No	No	No	No	No	Most of the time	Some of the time	Never	Some of the time	Seldom	Some of the time	Some of the time	Some of the time	Never	Never	Daily or almost daily	Daily or almost daily	Daily or almost daily	Daily or almost daily
389	34	Women	University	no	Rarely True	Almost Never True	Almost Never True	Almost Never True	Rarely True	Almost Never True	Almost Never True	Rarely True	Often True	Almost Never True	Rarely True	Almost Never True	Rarely True	Almost Never True	Almost Never True	Almost Never True	Rarely True	No	No	Yes	Yes	Yes	Yes	Yes	No	No	Yes	No	No	Yes		Most of the time	Some of the time	Seldom	Seldom	Never		Seldom	Never	Occasionally	Rarely	Occasionally	Never	Rarely	Occasionally
388	37	Men	University	no	Often True	Almost Always True	Almost Never True	Almost Always True	Almost Always True	Often True	Almost Always True	Often True	Often True	Almost Always True	Almost Never True	Often True	Rarely True	Often True	Often True	Often True	Often True	No	No	Yes	Yes	Yes	Yes	Yes	No	Yes	Yes	No				Seldom	Most of the time	Seldom	Some of the time	Some of the time	Some of the time	Seldom	Some of the time	Never	Sometimes	Daily or almost daily	Daily or almost daily	Sometimes	Often
387	42	Men	postgraduate	no	Often True	Almost Always True	Rarely True	Rarely True	Rarely True	Almost Never True	Almost Always True	Almost Never True	Often True	Often True	Almost Never True	Often True	Rarely True	Almost Always True	Often True	Almost Always True	Often True	No	No	No	No	Yes	Yes	Yes	No	Yes	No	No	No	Yes		Most of the time	Most of the time	Seldom	Most of the time	Most of the time	Never	Never	Most of the time	Rarely	Never	Sometimes	Rarely		Sometimes
386	50	Men	University	no	Rarely True	Rarely True	Almost Never True	Almost Never True	Rarely True	Rarely True	Almost Always True	Rarely True	Rarely True	Rarely True	Almost Never True	Almost Always True	Almost Never True	Almost Never True	Often True	Almost Always True	Almost Always True	No	No	Yes	Yes	Yes	Yes	Yes	No	Yes	Yes	Yes				Seldom	Seldom	Some of the time	Most of the time	Most of the time	Most of the time	Never	Most of the time	Never	Never	Daily or almost daily	Daily or almost daily	Sometimes	Often
385	25	Women	highschool	no	Often True	Rarely True	Almost Never True	Rarely True	Almost Never True	Often True	Almost Always True	Rarely True	Almost Always True	Often True	Almost Never True	Almost Never True	Almost Never True	Almost Never True	Rarely True	Rarely True	Rarely True	No	No	Yes	Yes	No	No	No	No	No	No	Yes				Seldom	Seldom	Seldom	Most of the time	Some of the time	Some of the time	Most of the time	Most of the time	Occasionally	Occasionally	Daily or almost daily	Sometimes	Daily or almost daily	Sometimes
384	36	Men	University	no	Rarely True	Often True	Often True	Almost Always True	Almost Always True	Often True	Almost Always True	Almost Always True	Often True	Almost Always True	Almost Never True	Often True	Often True	Often True	Rarely True	Almost Always True	Almost Always True	No	No	No	No	No	No	No	No	No	No	No	No			Never	Never	Never	Most of the time	Seldom	Some of the time	Some of the time	Most of the time	Sometimes	Rarely	Often	Sometimes	Often	Sometimes
383	37	Men	University	no	Often True	Often True	Almost Always True	Rarely True	Almost Never True	Rarely True	Almost Always True	Almost Always True	Often True	Almost Never True	Almost Never True	Often True	Almost Never True	Often True	Often True	Rarely True	Rarely True	No	No	Yes	Yes	No	Yes	Yes	No	No	Yes	Yes				Seldom	Some of the time	Seldom	Most of the time	Never	Seldom	Never	Most of the time	Occasionally	Occasionally	Sometimes	Often	Often	Often
382	23	Men	highschool	no	Often True	Rarely True	Often True	Almost Always True	Almost Always True	Almost Always True	Almost Always True	Almost Always True	Rarely True	Almost Never True	Almost Never True	Almost Never True	Often True	Almost Never True	Often True	Almost Never True	Often True	No	No	Yes	Yes	No	Yes	No	No	No	No	Yes	Yes	Yes		Most of the time	Never	Never	Most of the time	Seldom	Most of the time	Some of the time	Some of the time	Occasionally	Never	Daily or almost daily	Daily or almost daily	Daily or almost daily	Never
381	47	Men	University	no	Rarely True	Often True	Often True	Often True	Rarely True	Rarely True	Often True	Rarely True	Almost Never True	Rarely True	Almost Never True	Often True	Almost Never True	Rarely True	Often True	Often True	Rarely True	No	No	Yes	Yes	No	No	No	No	No	Yes	Yes	Yes			Never	Seldom	Never	Most of the time	Some of the time	Never	Never	Most of the time	Never	Never	Daily or almost daily	Often	Daily or almost daily	Often
380	43	Women	University	no	Rarely True	Rarely True	Almost Never True	Almost Always True	Rarely True	Often True	Rarely True	Rarely True	Almost Never True	Rarely True	Almost Never True	Rarely True	Rarely True	Rarely True	Rarely True	Often True	Rarely True	No	No	Yes	Yes	No	No	No	No	No	Yes	No	No	No	No	Never	Seldom	Seldom	Never	Never	Seldom	Never	Never	Rarely	Rarely	Sometimes	Rarely	Sometimes	Occasionally
38	22	Women	highschool	no	Often True	Often True	Rarely True	Often True	Often True	Rarely True	Almost Always True	Rarely True	Almost Always True	Often True	Almost Never True	Rarely True	Rarely True	Rarely True	Almost Never True	Often True	Often True	No	No	No	No	No	No	No	Yes	No	No	No	No						Most of the time				Most of the time	Sometimes	Rarely	Daily or almost daily	Daily or almost daily	Often	Often
379	35	Women	University	no	Often True	Often True	Rarely True	Rarely True	Often True	Often True	Almost Always True	Often True	Often True	Almost Always True	Almost Never True	Rarely True	Rarely True	Almost Never True	Often True	Almost Always True	Rarely True	No	No	Yes	Yes	No	Yes	Yes	No	Yes	Yes	No	No	Yes	No	Most of the time	Some of the time	Never	Never	Never	Some of the time	Never	Never	Rarely	Rarely	Sometimes	Never	Daily or almost daily	Sometimes
378	25	Women	highschool	no	Rarely True	Often True	Often True	Often True	Often True	Often True	Often True	Rarely True	Often True	Often True	Almost Never True	Often True	Rarely True	Often True	Rarely True	Often True	Often True	No	No	Yes	Yes	No	Yes	No	No	Yes	Yes	Yes	No	No		Never	Seldom	Some of the time	Most of the time	Some of the time	Most of the time	Most of the time	Most of the time	Occasionally	Rarely	Daily or almost daily	Daily or almost daily	Daily or almost daily	Sometimes
377	21	Women	highschool	no	Rarely True	Almost Never True	Rarely True	Almost Never True	Rarely True	Rarely True	Rarely True	Almost Never True	Rarely True	Rarely True	Almost Never True	Almost Never True	Almost Never True	Almost Never True	Almost Never True	Almost Never True	Rarely True	No	No	Yes	Yes	No	No	Yes	No	No	Yes	Yes		No	No	Never	Never	Never	Most of the time	Never	Seldom	Never	Some of the time	Rarely	Occasionally	Daily or almost daily	Sometimes	Often	Occasionally
376	45	Men	University	no	Rarely True	Almost Always True	Rarely True	Almost Always True	Often True	Rarely True	Often True	Rarely True	Almost Never True	Rarely True	Almost Never True	Rarely True	Almost Always True	Almost Never True	Almost Never True	Often True	Almost Always True	No	No	No	No	No	No	No	Yes	No	No	No	No		Yes	Never	Seldom	Never	Most of the time	Some of the time	Some of the time	Some of the time	Some of the time	Often	Occasionally	Daily or almost daily	Daily or almost daily	Daily or almost daily	Daily or almost daily
375	20	Women	highschool	no	Rarely True	Rarely True	Often True	Often True	Often True	Almost Always True	Almost Always True	Almost Always True	Almost Always True	Almost Always True	Almost Never True	Almost Always True	Rarely True	Almost Always True	Almost Always True	Almost Always True	Often True	No	No	Yes	Yes	No	Yes	No	No	Yes	Yes	No	No	No		Seldom	Seldom	Some of the time	Some of the time	Some of the time	Some of the time	Never	Never	Rarely	Never	Daily or almost daily	Sometimes	Often	Sometimes
374	23	Women	highschool	no	Often True	Almost Always True	Rarely True	Almost Never True	Rarely True	Often True	Almost Always True	Almost Always True	Often True	Rarely True	Almost Never True	Often True	Almost Never True	Almost Never True	Rarely True	Rarely True	Almost Never True	No	No	Yes	No	Yes	Yes	No	No	Yes	No	No	No	Yes		Seldom	Some of the time							Rarely	Rarely	Occasionally	Occasionally	Never	Never
373	53	Men	postgraduate	no	Often True	Often True	Rarely True	Almost Never True	Rarely True	Almost Never True	Almost Always True	Almost Always True	Often True	Rarely True	Almost Never True	Almost Never True	Almost Never True	Almost Never True	Almost Never True	Almost Always True	Rarely True	No	No	No	No	No	No	No	Yes	No	Yes	Yes	No	No		Never	Never	Never	Most of the time	Some of the time	Some of the time	Seldom	Most of the time	Sometimes	Sometimes	Sometimes	Sometimes	Sometimes	Sometimes
372	51	Men	University	no	Rarely True	Rarely True	Almost Always True	Almost Never True	Almost Never True	Often True	Almost Always True	Rarely True	Often True	Rarely True	Almost Never True	Often True	Almost Never True	Often True	Often True	Almost Always True	Rarely True	No	No	Yes	Yes	No	Yes	Yes	No	Yes	Yes	No	No			Never	Most of the time	Seldom	Seldom	Seldom	Most of the time	Seldom	Seldom	Rarely	Never	Daily or almost daily	Daily or almost daily	Often	Sometimes
371	22	Women	highschool	no	Often True	Often True	Almost Always True	Often True	Often True	Often True	Almost Always True	Almost Always True	Often True	Often True	Rarely True	Often True	Often True	Often True	Often True	Often True	Often True	No	No	Yes	Yes	Yes	No	Yes	No	Yes	Yes	Yes	Yes	No		Never	Most of the time	Seldom	Most of the time	Seldom	Some of the time	Some of the time	Some of the time	Rarely	Never	Daily or almost daily	Daily or almost daily	Often	Often
370	39	Men	University	no	Often True	Often True	Often True	Almost Always True	Often True	Rarely True	Almost Always True	Rarely True	Often True	Often True	Almost Never True	Often True	Often True	Often True	Often True	Almost Always True	Often True	No	No	Yes	Yes	Yes	No	Yes	No	Yes	Yes	Yes	No	No	No	Never	Seldom	Seldom	Most of the time	Never	Seldom	Some of the time	Most of the time	Never	Never	Daily or almost daily	Never	Daily or almost daily	Daily or almost daily
37	44	Women	University	no	Often True	Rarely True	Rarely True	Almost Never True	Almost Never True	Rarely True	Almost Always True	Rarely True	Almost Never True	Rarely True	Almost Never True	Almost Never True	Almost Never True	Often True	Rarely True	Often True	Rarely True	No	No	No	No	No	No	No	No	Yes	No	Yes	No	No		Never	Seldom	Never	Some of the time	Seldom	Some of the time	Never	Never	Sometimes	Sometimes	Sometimes	Sometimes	Sometimes	Sometimes
369	25	Women	highschool	no	Often True	Rarely True	Rarely True	Rarely True	Rarely True	Rarely True	Rarely True	Rarely True	Almost Always True	Rarely True	Rarely True	Almost Never True	Rarely True	Rarely True	Almost Never True	Rarely True	Rarely True	No	No	Yes	Yes	Yes	Yes	Yes	No	Yes	Yes	No	Yes		Yes	Seldom	Some of the time	Seldom	Seldom	Some of the time	Seldom	Some of the time	Some of the time	Occasionally	Occasionally	Rarely	Occasionally	Occasionally	Occasionally
368	17	Men	postgraduate	no	Almost Always True	Often True	Almost Always True	Often True	Almost Always True	Rarely True	Almost Never True	Rarely True	Often True	Almost Always True	Almost Never True	Almost Always True	Almost Always True	Often True	Often True	Almost Always True	Rarely True	No	No	Yes	Yes	No	No	Yes	No	Yes	Yes	No	No			Never	Seldom	Never	Some of the time	Some of the time	Most of the time	Seldom	Some of the time	Rarely	Never	Often	Never	Daily or almost daily	Daily or almost daily
367	22	Women	postgraduate	no	Rarely True	Often True	Rarely True	Almost Always True	Almost Always True	Rarely True	Almost Always True	Rarely True	Often True	Almost Always True	Almost Never True	Almost Always True	Almost Always True	Almost Always True	Rarely True	Almost Always True	Almost Always True	No	No	No	No	No	No	No	Yes	No	No	No	No			Most of the time	Some of the time	Never	Most of the time	Some of the time	Never	Seldom	Most of the time	Sometimes	Rarely	Daily or almost daily	Often	Daily or almost daily	Often
366	19	Men	postgraduate	no	Almost Always True	Often True	Often True	Rarely True	Rarely True	Often True	Often True	Rarely True	Almost Never True	Rarely True	Almost Never True	Often True	Rarely True	Often True	Rarely True	Often True	Rarely True	No	No	Yes	Yes	Yes	Yes	Yes	No	Yes	Yes	No				Never	Some of the time	Seldom	Most of the time	Most of the time	Most of the time	Most of the time	Some of the time	Rarely	Rarely	Daily or almost daily	Sometimes	Daily or almost daily	Sometimes
365	19	Men	postgraduate	no	Rarely True	Often True	Rarely True	Rarely True	Almost Always True	Rarely True	Often True	Rarely True	Almost Always True	Almost Always True	Almost Never True	Rarely True	Rarely True	Often True	Often True	Often True	Rarely True	No	No	Yes	No	No	No	No	No	Yes	Yes	Yes	Yes	No	No	Never	Some of the time	Never	Most of the time	Never	Seldom	Most of the time	Most of the time	Rarely	Rarely	Often	Sometimes	Sometimes	Rarely
364	21	Women	highschool	no	Almost Never True	Rarely True	Often True	Rarely True	Rarely True	Often True	Almost Always True	Rarely True	Rarely True	Rarely True	Almost Always True	Rarely True	Rarely True	Often True	Often True	Often True	Often True	No	No	Yes	Yes	No	No	No	No	No	Yes	Yes	No	Yes	No	Most of the time	Seldom	Seldom	Most of the time	Some of the time	Some of the time	Never	Some of the time	Sometimes	Never	Daily or almost daily	Sometimes	Often	Often
363	37	Women	University	no	Almost Always True	Often True	Often True	Almost Always True	Almost Always True	Rarely True	Almost Always True	Often True	Almost Always True	Almost Always True	Almost Never True	Almost Always True	Often True	Almost Always True	Almost Always True	Almost Always True	Almost Always True	No	No	Yes	Yes	No	No	No	No	Yes	Yes	No	No	Yes		Seldom	Never	Never	Some of the time	Never	Some of the time	Some of the time	Seldom	Rarely	Rarely	Daily or almost daily	Occasionally	Daily or almost daily	Daily or almost daily
362	23	Women	highschool	no	Often True	Often True	Rarely True	Rarely True	Rarely True	Almost Never True	Often True	Almost Never True	Almost Never True	Almost Never True	Rarely True	Rarely True	Almost Never True	Rarely True	Almost Never True	Often True	Rarely True	No	No	No	Yes	No	Yes	Yes	No	No	Yes	Yes				Most of the time	Seldom	Seldom	Most of the time	Most of the time	Most of the time	Seldom	Some of the time	Rarely	Occasionally	Occasionally	Occasionally	Occasionally	Occasionally
361	26	Women	highschool	no	Almost Never True	Almost Always True	Often True	Often True	Almost Always True	Rarely True	Almost Always True	Rarely True	Almost Always True	Almost Always True	Almost Never True	Rarely True	Almost Always True	Rarely True	Rarely True	Often True	Almost Always True	No	No	Yes	Yes	Yes	No	No	No	Yes	Yes	Yes	No	Yes		Most of the time	Seldom	Some of the time	Most of the time	Never	Never	Most of the time	Most of the time	Sometimes	Sometimes	Often	Occasionally	Often	Daily or almost daily
360	35	Women	University	no	Almost Always True	Rarely True	Almost Never True	Almost Never True	Almost Never True	Almost Never True	Almost Always True	Almost Never True	Rarely True	Rarely True	Almost Never True	Almost Always True	Almost Never True	Rarely True	Rarely True	Almost Always True	Often True	No	No	Yes	Yes	No	No	Yes	No	Yes	Yes	Yes				Seldom	Some of the time	Never	Most of the time				Most of the time	Occasionally	Rarely	Daily or almost daily	Occasionally	Occasionally	Daily or almost daily
36	65	Women	University	no	Rarely True	Often True	Often True	Rarely True	Rarely True	Almost Always True	Almost Always True	Often True	Almost Never True	Often True	Rarely True	Almost Always True	Often True	Often True	Often True	Almost Always True	Often True	No	No	Yes	Yes	No	No	Yes	No	Yes	Yes	No	No	Yes		Most of the time	Most of the time	Never	Seldom	Seldom	Never	Never	Seldom	Never	Never	Daily or almost daily	Rarely	Daily or almost daily	Sometimes
359	41	Men	postgraduate	no	Rarely True	Rarely True	Rarely True	Almost Never True	Almost Always True	Almost Always True	Often True	Often True	Almost Never True	Almost Always True	Almost Never True	Often True	Almost Never True	Almost Never True	Rarely True	Often True	Almost Never True	No	No	Yes	No	No	Yes	No	No	Yes	No	No	No	Yes		Seldom	Most of the time	Most of the time	Most of the time	Most of the time				Never	Never	Daily or almost daily	Daily or almost daily	Daily or almost daily	Often
358	35	Men	University	no	Often True	Rarely True	Often True	Rarely True	Rarely True	Rarely True	Almost Always True	Rarely True	Almost Always True	Rarely True	Almost Never True	Rarely True	Rarely True	Almost Never True	Almost Never True	Almost Never True	Rarely True	No	No	No	No	No	No	No	Yes	No	Yes	Yes	No	No	No	Never	Never	Never	Some of the time	Some of the time	Seldom	Never	Some of the time	Occasionally	Rarely	Daily or almost daily	Daily or almost daily	Daily or almost daily	Sometimes
357	20	Women	highschool	no	Rarely True	Almost Never True	Almost Never True	Almost Never True	Almost Never True	Almost Never True	Almost Never True	Almost Never True	Almost Always True	Almost Never True	Almost Never True	Almost Never True	Almost Never True	Rarely True	Almost Never True	Rarely True	Almost Never True	No	No	No	Yes	No	Yes	Yes	No	Yes	No	Yes	No	Yes	No	Most of the time	Seldom	Never	Some of the time	Seldom	Never	Some of the time	Seldom	Occasionally	Rarely	Never	Occasionally	Rarely	Never
356	50	Men	University	no	Rarely True	Rarely True	Rarely True	Almost Never True	Almost Never True	Almost Never True	Often True	Almost Always True	Often True	Almost Never True	Almost Never True	Rarely True	Almost Never True	Almost Never True	Rarely True	Rarely True	Almost Never True	No	No	No	Yes	No	Yes	Yes	No	Yes	Yes	Yes	Yes	Yes		Seldom	Seldom	Seldom	Some of the time	Some of the time	Some of the time	Some of the time	Some of the time	Occasionally	Occasionally	Sometimes	Sometimes	Occasionally	Never
355	36	Women	University	no	Rarely True	Often True	Often True	Often True	Rarely True	Rarely True	Often True	Often True	Rarely True	Often True	Almost Never True	Often True	Almost Never True	Often True	Often True	Often True	Almost Never True	No	No	Yes	Yes	Yes	Yes	Yes	No	Yes	Yes	No				Never	Most of the time		Some of the time		Most of the time			Rarely	Rarely	Daily or almost daily	Sometimes	Daily or almost daily	Often
354	23	Women	University	no	Almost Never True	Often True	Rarely True	Rarely True	Rarely True	Rarely True	Rarely True	Rarely True	Rarely True	Rarely True	Almost Never True	Rarely True	Rarely True	Rarely True	Rarely True	Rarely True	Often True	No	No	Yes	Yes	Yes	Yes	Yes	No	Yes	Yes	Yes	Yes	No		Most of the time	Some of the time	Some of the time	Some of the time	Some of the time	Some of the time	Some of the time	Some of the time	Rarely	Rarely	Rarely	Rarely	Rarely	Never
353	54	Men	University	no	Often True	Often True	Often True	Almost Never True	Almost Always True	Often True	Almost Always True	Often True	Rarely True	Almost Always True	Almost Always True	Often True	Almost Never True	Often True	Often True	Almost Always True	Rarely True	No	No	No	No	Yes	Yes	No	No	Yes	Yes	Yes	Yes	Yes	No	Most of the time	Some of the time	Some of the time	Never	Never	Most of the time	Never	Never	Never	Never	Daily or almost daily	Sometimes	Daily or almost daily	Sometimes
352	51	Women	University	no	Rarely True	Often True	Rarely True	Rarely True	Often True	Often True	Often True	Often True	Almost Always True	Often True	Almost Never True	Often True	Often True	Often True	Often True	Often True	Often True	No	No	Yes	Yes	Yes	Yes	Yes	No	Yes	Yes	No				Seldom	Seldom	Some of the time	Most of the time	Some of the time	Some of the time	Some of the time	Most of the time	Occasionally	Rarely	Daily or almost daily	Sometimes	Often	Sometimes
351	34	Men	University	no	Almost Always True	Often True	Often True	Almost Never True	Almost Always True	Almost Always True	Rarely True	Rarely True	Almost Always True	Almost Always True	Almost Always True	Almost Always True	Almost Never True	Often True	Often True	Almost Always True	Rarely True	No	No	Yes	Yes	No	Yes	Yes	No	No	Yes	Yes				Never	Some of the time	Never	Most of the time	Seldom	Some of the time	Never	Never	Never	Never	Daily or almost daily	Never	Daily or almost daily	Occasionally
350	23	Women	highschool	no	Almost Never True	Rarely True	Rarely True	Often True	Almost Always True	Often True	Almost Always True	Often True	Almost Always True	Almost Always True	Rarely True	Almost Always True	Often True	Rarely True	Rarely True	Rarely True	Rarely True	No	No	No	No	Yes	Yes	Yes	No	Yes	No	Yes	Yes	Yes	Yes	Seldom	Seldom	Never	Some of the time	Some of the time	Some of the time	Never	Some of the time	Rarely	Never	Daily or almost daily	Occasionally	Daily or almost daily	Sometimes
35	39	Women	University	no	Rarely True	Often True	Often True	Often True	Rarely True	Often True	Often True	Often True	Almost Always True	Rarely True	Almost Never True	Rarely True	Often True	Often True	Often True	Often True	Often True	No	No	Yes	Yes	Yes	Yes	Yes	No	No	Yes	Yes		Yes		Most of the time	Never	Seldom	Some of the time	Most of the time	Most of the time	Never	Some of the time	Never	Never	Daily or almost daily	Never	Daily or almost daily	Sometimes
349	47	Women	postgraduate	no	Often True	Almost Never True	Often True	Almost Never True	Often True	Often True	Almost Always True	Almost Always True	Rarely True	Often True	Almost Never True	Almost Always True	Almost Never True	Almost Always True	Almost Always True	Almost Always True	Almost Always True	No	No	Yes	Yes	Yes	Yes	No	No	Yes	Yes	Yes	Yes	Yes		Most of the time	Most of the time	Never	Most of the time	Most of the time	Most of the time	Seldom	Some of the time	Rarely	Rarely	Daily or almost daily	Often	Daily or almost daily	Often
348	38	Men	University	no	Often True	Rarely True	Rarely True	Often True	Rarely True	Often True	Almost Always True	Rarely True	Often True	Often True	Rarely True	Often True	Often True	Often True	Often True	Almost Always True	Rarely True	No	No	Yes	Yes	Yes	Yes	Yes	No	Yes	Yes	Yes				Seldom	Seldom		Some of the time		Some of the time	Some of the time		Never	Never	Daily or almost daily	Sometimes	Daily or almost daily	Sometimes
347	53	Women	University	no	Often True	Often True	Rarely True	Rarely True	Rarely True	Often True	Often True	Often True	Often True	Often True	Almost Never True	Often True	Rarely True	Often True	Often True	Often True	Rarely True	No	No	Yes	Yes	Yes	Yes	Yes	No	Yes	Yes	Yes				Never	Seldom	Seldom	Some of the time	Some of the time	Some of the time	Seldom	Some of the time	Never	Never	Daily or almost daily	Rarely	Often	Sometimes
346	39	Women	University	no	Often True	Rarely True	Almost Always True	Almost Always True	Rarely True	Rarely True	Almost Always True	Rarely True	Rarely True	Rarely True	Rarely True	Often True	Often True	Rarely True	Rarely True	Often True	Often True	No	No	Yes	Yes	No	No	No	No	Yes	Yes	Yes				Most of the time	Seldom	Seldom	Some of the time	Some of the time	Some of the time	Some of the time	Some of the time	Rarely	Occasionally	Often	Daily or almost daily	Daily or almost daily	Often
345	25	Women	highschool	no	Rarely True	Rarely True	Almost Never True	Almost Always True	Almost Never True	Almost Always True	Almost Always True	Often True	Rarely True	Rarely True	Almost Never True	Almost Always True	Often True	Almost Always True	Almost Always True	Almost Always True	Almost Always True	No	No	Yes	Yes	Yes	No	Yes	No	Yes	Yes	Yes	Yes	Yes	No	Most of the time	Some of the time	Never	Most of the time	Never	Some of the time	Some of the time	Some of the time	Never	Never	Daily or almost daily	Sometimes	Often	Never
344	59	Women	University	no	Almost Never True	Often True	Often True	Rarely True	Often True	Almost Always True	Almost Always True	Almost Always True	Often True	Almost Always True	Almost Never True	Often True	Often True	Rarely True	Almost Never True	Almost Always True	Often True	No	No	No	No	No	No	No	No	No	No	No	No	No	No	Never	Seldom	Most of the time	Some of the time	Never	Seldom	Never	Never	Often	Sometimes	Daily or almost daily	Sometimes	Rarely	Daily or almost daily
343	21	Women	University	no	Often True	Rarely True	Often True	Almost Never True	Rarely True	Often True	Often True	Rarely True	Almost Never True	Often True	Almost Never True	Rarely True	Rarely True	Often True	Rarely True	Almost Always True	Almost Never True	No	No	Yes	Yes	No	Yes	No	No	No	Yes	Yes		No		Seldom	Never	Never	Some of the time	Some of the time	Some of the time	Some of the time	Some of the time	Rarely	Occasionally	Sometimes	Rarely	Often	Sometimes
342	19	Women	postgraduate	no	Almost Always True	Rarely True	Almost Always True	Often True	Almost Always True	Rarely True	Almost Always True	Rarely True	Almost Always True	Almost Always True	Almost Never True	Often True	Almost Never True	Often True	Often True	Almost Always True	Rarely True	No	No	No	No	No	Yes	No	No	No	Yes	Yes	No	No		Never	Never	Never	Most of the time	Some of the time	Seldom	Seldom	Some of the time	Sometimes	Never	Daily or almost daily	Often	Often	Often
341	23	Women	postgraduate	no	Rarely True	Almost Always True	Often True	Rarely True	Almost Never True	Rarely True	Often True	Often True	Almost Always True	Almost Never True	Almost Never True	Almost Never True	Rarely True	Almost Never True	Almost Never True	Almost Always True	Rarely True	No	No	Yes	Yes	No	No	Yes	No	Yes	Yes	Yes	Yes			Never	Seldom	Never	Most of the time	Some of the time	Most of the time	Most of the time	Most of the time	Rarely	Never	Often	Often	Often	Often
340	19	Women	postgraduate	no	Almost Always True	Rarely True	Rarely True	Often True	Almost Always True	Often True	Often True	Often True	Often True	Almost Always True	Almost Never True	Often True	Rarely True	Often True	Rarely True	Often True	Rarely True	No	No	No	No	No	No	No	No	No	No	No	No			Never	Seldom	Never	Most of the time	Some of the time	Most of the time	Some of the time	Most of the time	Rarely	Rarely	Daily or almost daily	Sometimes	Daily or almost daily	Often
34	21	Women	highschool	no	Often True	Often True	Rarely True	Almost Always True	Rarely True	Often True	Often True	Often True	Often True	Often True	Almost Never True	Rarely True	Often True	Almost Always True	Rarely True	Often True	Almost Always True	No	No	No	No	Yes	Yes	No	No	No	Yes	Yes	Yes	No		Never	Seldom	Never	Most of the time	Seldom	Some of the time	Some of the time	Some of the time	Sometimes	Never	Daily or almost daily	Daily or almost daily	Daily or almost daily	Often
339	30	Women	University	no	Often True	Often True	Rarely True	Rarely True	Rarely True	Rarely True	Almost Always True	Rarely True	Rarely True	Rarely True	Rarely True	Often True	Almost Never True	Rarely True	Rarely True	Almost Always True	Almost Always True	No	No	No	No	Yes	No	Yes	No	Yes	Yes	No	No	No		Never	Seldom	Never	Most of the time	Never	Never	Never	Seldom	Rarely	Never	Daily or almost daily	Often	Never	Occasionally
338	21	Women	highschool	no	Rarely True	Rarely True	Rarely True	Rarely True	Almost Never True	Rarely True	Often True	Rarely True	Often True	Almost Never True	Almost Never True	Rarely True	Rarely True	Rarely True	Often True	Rarely True	Often True	No	No	Yes	Yes	Yes	No	Yes	No	No	No	Yes				Never	Never	Never	Most of the time	Never	Never	Most of the time	Seldom	Sometimes	Sometimes	Occasionally	Often	Rarely	Sometimes
337	22	Women	highschool	no	Rarely True	Often True	Often True	Often True	Almost Never True	Rarely True	Often True	Rarely True	Almost Always True	Almost Never True	Rarely True	Often True	Almost Never True	Rarely True	Rarely True	Rarely True	Often True	No	No	Yes	Yes	Yes	No	No	No	Yes	Yes	Yes	No	No		Seldom	Most of the time	Most of the time	Most of the time	Most of the time	Most of the time	Most of the time	Most of the time	Never	Never	Occasionally	Rarely	Sometimes	Rarely
336	37	Women	University	no	Often True	Often True	Almost Never True	Almost Never True	Almost Never True	Almost Never True	Often True	Almost Never True	Often True	Almost Never True	Almost Never True	Often True	Often True	Often True	Often True	Rarely True	Rarely True	No	No	Yes	Yes	Yes	Yes	No	No	Yes	Yes	No	No			Never	Most of the time	Some of the time	Never	Never	Seldom	Never	Seldom	Never	Never	Daily or almost daily	Sometimes	Daily or almost daily	Rarely
335	26	Women	highschool	no	Often True	Often True	Often True	Almost Always True	Rarely True	Rarely True	Rarely True	Rarely True	Almost Never True	Rarely True	Rarely True	Rarely True	Often True	Often True	Often True	Often True	Almost Always True	No	No	Yes	Yes	Yes	Yes	Yes	No	Yes	Yes	Yes				Most of the time	Some of the time	Seldom	Most of the time	Seldom	Some of the time	Some of the time	Some of the time	Occasionally	Occasionally	Daily or almost daily	Occasionally	Often	Sometimes
334	22	Women	University	no	Rarely True	Often True	Rarely True	Almost Never True	Rarely True	Rarely True	Often True	Almost Never True	Almost Always True	Almost Never True	Often True	Often True	Almost Never True	Almost Never True	Rarely True	Rarely True	Almost Never True	No	No	Yes	Yes	No	Yes	Yes	No	Yes	Yes	No	No	Yes		Seldom	Seldom		Most of the time	Some of the time		Seldom	Seldom	Occasionally	Rarely	Often	Often	Often	Sometimes
333	30	Women	University	no	Almost Always True	Rarely True	Often True	Almost Always True	Almost Always True	Almost Always True	Almost Always True	Often True	Rarely True	Almost Always True	Almost Never True	Often True	Rarely True	Often True	Often True	Often True	Rarely True	No	No	Yes	No	No	Yes	Yes	No	Yes	Yes	Yes	Yes	No	No	Never	Never	Never	Most of the time	Seldom	Some of the time	Some of the time	Some of the time	Rarely	Never	Often	Daily or almost daily	Sometimes	Rarely
332	22	Women	highschool	no	Rarely True	Often True	Often True	Rarely True	Almost Never True	Almost Never True	Often True	Almost Never True	Almost Always True	Almost Never True	Almost Never True	Often True	Often True	Often True	Rarely True	Often True	Often True	No	No	Yes	Yes	Yes	Yes	Yes	No	No	Yes	No	No	Yes	No	Most of the time	Some of the time	Seldom	Never	Never	Never	Never	Never	Occasionally	Occasionally	Daily or almost daily	Occasionally	Occasionally	Rarely
331	23	Women	highschool	no	Almost Always True	Almost Always True	Rarely True	Almost Always True	Almost Never True	Rarely True	Almost Always True	Rarely True	Almost Always True	Almost Never True	Almost Never True	Almost Always True	Almost Never True	Almost Always True	Almost Always True	Rarely True	Almost Never True	No	No	Yes	Yes	No	Yes	Yes	No	No	No	Yes	Yes			Never	Never		Most of the time	Most of the time	Most of the time	Some of the time	Most of the time	Sometimes	Sometimes	Often	Daily or almost daily	Sometimes	Never
330	19	Women	postgraduate	no	Almost Never True	Rarely True	Often True	Rarely True	Almost Always True	Often True	Almost Always True	Almost Never True	Almost Never True	Almost Always True	Almost Never True	Almost Always True	Almost Never True	Rarely True	Often True	Often True	Almost Never True	No	No	No	No	No	Yes	No	No	Yes	Yes	No	No	Yes	Yes	Never	Some of the time	Seldom	Most of the time	Seldom	Seldom	Never	Most of the time	Occasionally	Occasionally	Sometimes	Sometimes	Daily or almost daily
33	49	Women	University	no	Almost Never True	Often True	Often True	Rarely True	Almost Never True	Almost Never True	Often True	Rarely True	Often True	Almost Never True	Almost Never True	Almost Never True	Rarely True	Rarely True	Often True	Almost Always True	Rarely True	No	No	No	No	No	No	No	No	No	No	Yes	No	Yes		Seldom	Never	Never	Seldom	Seldom	Seldom	Some of the time	Some of the time	Rarely	Never	Daily or almost daily	Rarely	Daily or almost daily	Often
329	20	Women	postgraduate	no	Often True	Often True	Rarely True	Almost Always True	Often True	Almost Always True	Almost Always True	Rarely True	Almost Always True	Rarely True	Almost Never True	Almost Always True	Rarely True	Rarely True	Rarely True	Almost Always True	Almost Always True	No	No	No	No	No	No	Yes	No	No	Yes	Yes	No	No		Never	Seldom	Never	Some of the time	Some of the time	Most of the time	Seldom	Seldom	Rarely	Never	Daily or almost daily	Often	Daily or almost daily	Often
328	25	Women	highschool	no	Almost Always True	Often True	Almost Never True	Almost Always True	Almost Always True	Almost Always True	Almost Always True	Often True	Almost Always True	Almost Always True	Almost Never True	Often True	Often True	Often True	Almost Always True	Almost Always True	Often True	No	No	Yes	Yes	No	Yes	Yes	No	Yes	No	No	No	Yes		Some of the time	Some of the time	Some of the time	Never	Never	Some of the time	Never	Never	Never	Never	Daily or almost daily	Occasionally	Daily or almost daily	Often
327	29	Women	University	no	Often True	Rarely True	Almost Never True	Often True	Rarely True	Often True	Often True	Almost Never True	Often True	Almost Never True	Almost Never True	Almost Always True	Rarely True	Rarely True	Often True	Often True	Rarely True	No	No	No	No	Yes	No	Yes	No	No	No	Yes				Never	Never	Never	Most of the time	Some of the time	Some of the time	Most of the time	Some of the time	Sometimes	Occasionally	Daily or almost daily	Often	Daily or almost daily	Often
326	27	Women	secondary	no	Rarely True	Rarely True	Almost Never True	Almost Always True	Rarely True	Often True	Almost Always True	Almost Always True	Almost Never True	Rarely True	Almost Never True	Often True	Rarely True	Rarely True	Often True	Often True	Often True	No	No	Yes	Yes	No	Yes	Yes	No	Yes	Yes	No	No			Seldom	Seldom	Never	Some of the time	Never	Most of the time	Never	Some of the time	Occasionally	Never	Daily or almost daily	Sometimes	Daily or almost daily	Daily or almost daily
325	38	Women	University	no	Rarely True	Often True	Often True	Rarely True	Often True	Almost Always True	Almost Always True	Often True	Rarely True	Often True	Often True	Often True	Rarely True	Often True	Often True	Almost Always True	Often True	No	No	Yes	Yes	Yes	Yes	Yes	No	Yes	Yes	No	No	Yes		Most of the time	Some of the time	Most of the time	Some of the time	Seldom	Some of the time	Never	Seldom	Rarely	Rarely	Daily or almost daily	Rarely	Daily or almost daily	Often
324	19	Women	postgraduate	no	Almost Never True	Rarely True	Almost Never True	Often True	Almost Always True	Often True	Often True	Often True	Often True	Almost Always True	Often True	Rarely True	Almost Never True	Rarely True	Often True	Rarely True	Almost Never True	No	No	No	No	Yes	No	No	No	Yes	Yes	No	No			Never	Seldom	Never	Some of the time	Some of the time	Some of the time	Seldom	Some of the time	Rarely	Rarely	Occasionally	Often	Often	Daily or almost daily
323	20	Women	highschool	no	Often True	Rarely True	Often True	Almost Always True	Often True	Often True	Almost Always True	Often True	Almost Always True	Almost Always True	Almost Never True	Almost Always True	Often True	Almost Always True	Almost Always True	Almost Always True	Almost Always True	No	No	Yes	Yes	Yes	Yes	No	No	No	Yes	Yes	Yes	No		Never	Seldom	Never	Most of the time	Seldom	Most of the time	Seldom	Most of the time	Never	Never	Sometimes	Sometimes	Often	Never
322	25	Women	highschool	no	Often True	Almost Never True	Often True	Rarely True	Often True	Rarely True	Rarely True	Rarely True	Rarely True	Almost Always True	Almost Never True	Often True	Almost Never True	Often True	Almost Always True	Often True	Almost Never True	No	No	Yes	No	Yes	Yes	Yes	No	Yes	No	No	No	Yes		Most of the time	Some of the time	Most of the time	Some of the time	Never	Some of the time	Some of the time	Some of the time	Sometimes	Sometimes	Daily or almost daily	Daily or almost daily	Often	Often
321	27	Women	secondary	no	Rarely True	Rarely True	Almost Never True	Almost Never True	Almost Never True	Almost Never True	Often True	Rarely True	Often True	Rarely True	Rarely True	Often True	Rarely True	Often True	Often True	Often True	Often True	No	No	Yes	Yes	No	Yes	Yes	No	Yes	No	No	No			Some of the time								Occasionally	Sometimes	Often	Sometimes	Daily or almost daily	Often
320	35	Women	University	no	Often True	Often True	Almost Always True	Almost Always True	Often True	Often True	Almost Always True	Almost Always True	Almost Always True	Almost Always True	Almost Never True	Often True	Often True	Rarely True	Often True	Almost Always True	Often True	No	No	Yes	No	Yes	Yes	Yes	No	Yes	Yes	No	No	Yes		Most of the time	Some of the time	Never	Some of the time	Some of the time	Some of the time	Seldom	Some of the time	Never	Never	Daily or almost daily	Never	Often	Occasionally
32	34	Women	University	no	Rarely True	Almost Always True	Often True	Almost Always True	Rarely True	Rarely True	Almost Always True	Rarely True	Almost Always True	Rarely True	Rarely True	Often True	Often True	Almost Always True	Rarely True	Almost Always True	Almost Always True	No	No	Yes	Yes	No	Yes	No	No	No	Yes	No	No						Some of the time		Most of the time	Never	Some of the time	Rarely	Rarely	Daily or almost daily	Occasionally	Daily or almost daily	Daily or almost daily
319	24	Women	highschool	no	Often True	Often True	Often True	Often True	Often True	Often True	Almost Never True	Rarely True	Almost Always True	Often True	Rarely True	Almost Never True	Rarely True	Almost Always True	Almost Always True	Often True	Almost Always True	No	No	No	Yes	Yes	No	Yes	Yes	Yes	Yes	No	No	Yes	Yes	Most of the time	Some of the time	Some of the time	Some of the time	Some of the time	Some of the time	Some of the time	Some of the time	Rarely	Occasionally	Occasionally	Occasionally	Occasionally	Occasionally
318	25	Women	highschool	no	Often True	Almost Always True	Almost Always True	Almost Always True	Almost Always True	Often True	Almost Always True	Almost Always True	Rarely True	Often True	Almost Never True	Almost Always True	Rarely True	Almost Always True	Almost Always True	Almost Always True	Almost Always True	No	No	Yes	Yes	No	No	No	No	No	Yes	Yes	No	No	Yes	Never	Most of the time	Never	Most of the time	Never	Never	Some of the time	Some of the time	Never	Never	Daily or almost daily	Sometimes	Often	Sometimes
317	24	Women	highschool	no	Rarely True	Almost Never True	Almost Never True	Rarely True	Often True	Rarely True	Almost Always True	Often True	Rarely True	Almost Always True	Almost Never True	Rarely True	Rarely True	Almost Never True	Almost Never True	Often True	Almost Never True	No	No	No	No	No	No	No	Yes	No	No	No	No	No	No	Seldom	Seldom	Seldom	Most of the time	Some of the time	Some of the time	Most of the time	Most of the time	Rarely	Occasionally	Often	Sometimes	Often	Often
316	39	Women	University	no	Rarely True	Rarely True	Rarely True	Often True	Rarely True	Rarely True	Almost Always True	Rarely True	Often True	Often True	Almost Never True	Rarely True	Rarely True	Rarely True	Rarely True	Often True	Rarely True	No	No	No	No	No	Yes	No	No	No	No	Yes				Never	Never	Never	Most of the time	Never	Most of the time	Never	Most of the time	Sometimes	Never	Daily or almost daily	Occasionally	Daily or almost daily	Often
315	20	Men	highschool	no	Often True	Almost Always True	Almost Always True	Almost Always True	Almost Always True	Often True	Almost Always True	Almost Always True	Rarely True	Almost Always True	Almost Never True	Often True	Almost Never True	Rarely True	Rarely True	Often True	Almost Never True	No	No	Yes	Yes	Yes	Yes	Yes	No	Yes	Yes	Yes				Some of the time	Seldom	Never	Most of the time	Most of the time	Most of the time	Most of the time	Most of the time	Rarely	Rarely	Sometimes	Daily or almost daily	Daily or almost daily	Sometimes
314	29	Women	University	no	Rarely True	Rarely True	Rarely True	Rarely True	Almost Never True	Rarely True	Almost Always True	Rarely True	Rarely True	Almost Never True	Almost Never True	Often True	Rarely True	Almost Never True	Rarely True	Rarely True	Rarely True	No	No	No	Yes	No	Yes	No	No	No	Yes	No	Yes	Yes		Seldom	Some of the time	Never	Some of the time	Seldom	Some of the time	Never	Some of the time	Occasionally	Never	Often	Sometimes	Sometimes	Never
313	23	Women	postgraduate	no	Rarely True	Rarely True	Rarely True	Often True	Rarely True	Rarely True	Rarely True	Rarely True	Almost Always True	Often True	Almost Never True	Often True	Often True	Often True	Often True	Rarely True	Rarely True	No	No	Yes	No	Yes	No	No	Yes	Yes	Yes	Yes	No	No	No	Never	Seldom	Never	Most of the time	Some of the time	Seldom	Never	Never	Rarely	Rarely	Daily or almost daily	Often	Often	Sometimes
312	28	Women	University	no	Almost Never True	Rarely True	Rarely True	Rarely True	Rarely True	Rarely True	Often True	Rarely True	Almost Always True	Often True	Almost Never True	Often True	Rarely True	Often True	Often True	Almost Always True	Often True	No	No	Yes	Yes	No	Yes	No	No	Yes	No	No	No	Yes		Most of the time	Most of the time	Most of the time	Seldom	Never	Some of the time	Never	Seldom	Sometimes	Never	Daily or almost daily	Rarely	Daily or almost daily	Rarely
311	19	Women	postgraduate	no	Rarely True	Rarely True	Rarely True	Almost Never True	Almost Never True	Rarely True	Almost Never True	Rarely True	Often True	Rarely True	Almost Never True	Almost Never True	Almost Never True	Almost Never True	Almost Never True	Almost Never True	Almost Never True	No	No	Yes	Yes	No	Yes	Yes	No	Yes	Yes	Yes	Yes			Never	Some of the time	Some of the time	Some of the time	Some of the time	Some of the time	Some of the time	Some of the time	Occasionally	Occasionally	Sometimes	Sometimes	Often	Sometimes
310	24	Women	highschool	no	Almost Never True	Almost Never True	Rarely True	Rarely True	Rarely True	Almost Never True	Often True	Rarely True	Almost Always True	Often True	Almost Never True	Often True	Rarely True	Often True	Rarely True	Rarely True	Often True	No	No	Yes	Yes	No	No	No	No	No	Yes	No	Yes	Yes		Most of the time	Never	Never	Seldom	Seldom	Seldom	Never	Never	Rarely	Rarely	Daily or almost daily	Often	Often	Never
31	22	Women	highschool	no	Almost Never True	Often True	Often True	Often True	Often True	Rarely True	Almost Always True	Rarely True	Almost Always True	Rarely True	Almost Never True	Often True	Almost Never True	Almost Never True	Often True	Often True	Often True	No	No	Yes	Yes	Yes	Yes	Yes	No	Yes	No	No	No	Yes		Most of the time	Most of the time	Seldom	Some of the time	Some of the time	Some of the time	Some of the time	Some of the time	Sometimes	Sometimes	Daily or almost daily	Sometimes	Daily or almost daily	Often
309	41	Women	University	no	Rarely True	Often True	Almost Never True	Almost Always True	Often True	Often True	Almost Always True	Often True	Often True	Often True	Almost Never True	Almost Always True	Often True	Often True	Often True	Often True	Almost Always True	No	No	Yes	Yes	No	Yes	Yes	No	Yes	Yes	Yes				Never	Never	Never	Some of the time	Seldom	Some of the time	Never	Most of the time	Never	Never	Daily or almost daily	Often	Sometimes	Never
308	23	Women	highschool	no	Rarely True	Rarely True	Rarely True	Rarely True	Rarely True	Rarely True	Almost Never True	Rarely True	Rarely True	Rarely True	Rarely True	Rarely True	Rarely True	Rarely True	Rarely True	Rarely True	Rarely True	No	No	No	No	No	No	No	Yes	No	No	Yes	No	No	No	Never	Never	Never	Some of the time	Seldom	Seldom	Some of the time	Some of the time	Occasionally	Occasionally	Rarely	Never	Rarely	Occasionally
307	21	Women	highschool	no	Rarely True	Almost Always True	Often True	Often True	Rarely True	Rarely True	Almost Never True	Often True	Often True	Rarely True	Almost Never True	Often True	Rarely True	Rarely True	Often True	Often True	Often True	No	No	Yes	Yes	No	No	No	No	No	Yes	Yes				Never	Some of the time	Never	Seldom	Seldom	Seldom	Seldom	Seldom	Occasionally	Occasionally	Daily or almost daily	Daily or almost daily	Daily or almost daily	Never
306	24	Women	highschool	no	Almost Always True	Rarely True	Rarely True	Often True	Often True	Often True	Often True	Often True	Almost Never True	Almost Always True	Almost Never True	Often True	Almost Never True	Often True	Often True	Often True	Rarely True	No	No	No	No	Yes	Yes	Yes	No	No	Yes	No	No	No	No	Never	Seldom	Never	Some of the time	Some of the time	Some of the time	Some of the time	Some of the time	Occasionally	Often	Daily or almost daily	Sometimes	Daily or almost daily	Sometimes
305	21	Women	highschool	no	Almost Always True	Rarely True	Almost Never True	Often True	Often True	Often True	Almost Always True	Almost Always True	Almost Always True	Often True	Almost Never True	Often True	Almost Always True	Often True	Often True	Almost Always True	Often True	No	No	Yes	Yes	No	Yes	Yes	No	Yes	No	No	No	Yes	No	Seldom	Seldom	Seldom	Some of the time	Never	Never	Some of the time	Some of the time	Rarely	Rarely	Occasionally	Occasionally	Rarely	Occasionally
304	19	Men	postgraduate	no	Almost Always True	Rarely True	Rarely True	Rarely True	Rarely True	Rarely True	Almost Always True	Rarely True	Rarely True	Almost Always True	Almost Never True	Often True	Almost Never True	Almost Always True	Often True	Almost Never True	Rarely True	No	No	No	No	No	Yes	No	No	No	Yes	No	No	Yes	No	Seldom	Never	Never	Never	Never	Most of the time	Never	Never	Never	Never	Daily or almost daily	Never	Often	Never
303	31	Women	University	no	Almost Always True	Often True	Often True	Rarely True	Rarely True	Rarely True	Rarely True	Rarely True	Rarely True	Rarely True	Almost Never True	Rarely True	Rarely True	Often True	Often True	Often True	Often True	No	No	No	No	No	No	No	Yes	No	Yes	Yes	Yes	No	No	Never	Never	Never	Most of the time	Most of the time	Most of the time	Some of the time	Some of the time	Sometimes	Occasionally	Daily or almost daily	Often	Sometimes	Occasionally
302	57	Women	University	no	Almost Always True	Rarely True	Rarely True	Almost Always True	Rarely True	Rarely True	Often True	Almost Never True	Often True	Rarely True	Almost Never True	Often True	Almost Always True	Often True	Often True	Almost Always True	Almost Always True	No	No	Yes	Yes	Yes	Yes	Yes	No	Yes	Yes	Yes	Yes	No	No	Never	Seldom	Seldom	Most of the time	Some of the time	Some of the time	Some of the time	Some of the time	Sometimes	Rarely	Daily or almost daily	Daily or almost daily	Often	Often
301	21	Women	highschool	no	Rarely True	Almost Always True	Rarely True	Almost Always True	Rarely True	Often True	Almost Always True	Often True	Often True	Rarely True	Rarely True	Often True	Almost Always True	Rarely True	Rarely True	Almost Always True	Almost Always True	No	No	Yes	Yes	No	No	Yes	Yes	Yes	Yes	No	No	Yes		Most of the time	Seldom	Never	Most of the time	Seldom	Some of the time	Seldom	Most of the time	Sometimes	Sometimes	Daily or almost daily	Often	Daily or almost daily	Often
300	22	Women	highschool	no	Almost Never True	Often True	Rarely True	Often True	Almost Always True	Rarely True	Almost Always True	Often True	Often True	Almost Always True	Rarely True	Often True	Rarely True	Often True	Often True	Almost Always True	Almost Always True	No	No	Yes	Yes	Yes	Yes	Yes	No	No	Yes	Yes	No	No		Never	Seldom	Seldom	Most of the time	Some of the time	Some of the time	Most of the time	Most of the time	Sometimes	Sometimes	Daily or almost daily	Daily or almost daily	Daily or almost daily	Rarely
30	22	Women	highschool	no	Often True	Almost Never True	Rarely True	Rarely True	Often True	Often True	Almost Always True	Almost Always True	Almost Always True	Almost Always True	Almost Never True	Almost Always True	Often True	Almost Always True	Often True	Almost Always True	Often True	No	No	Yes	Yes	No	No	Yes	No	Yes	Yes	Yes	No	No	Yes	Seldom	Some of the time	Seldom	Some of the time	Some of the time	Most of the time	Some of the time	Some of the time	Occasionally	Rarely	Daily or almost daily	Often	Often	Often
3	22	Women	highschool	no	Rarely True	Often True	Almost Never True	Almost Always True	Rarely True	Almost Always True	Almost Always True	Almost Always True	Almost Always True	Often True	Almost Never True	Almost Always True	Often True	Almost Always True	Almost Always True	Often True	Almost Always True	No	No	No	No	No	Yes	Yes	No	Yes	Yes	No	No	No		Seldom	Most of the time	Never	Some of the time	Never	Seldom	Never	Most of the time	Never	Never	Daily or almost daily	Never	Daily or almost daily	Daily or almost daily
299	32	Women	University	no	Rarely True	Often True	Rarely True	Often True	Almost Always True	Rarely True	Almost Never True	Rarely True	Almost Always True	Often True	Almost Never True	Often True	Almost Always True	Almost Always True	Almost Always True	Almost Always True	Almost Always True	No	No	No	No	Yes	Yes	Yes	No	No	No	Yes				Never	Some of the time	Some of the time	Most of the time	Never	Most of the time	Most of the time	Most of the time	Never	Never	Daily or almost daily	Daily or almost daily	Often	Never
298	21	Women	highschool	no	Rarely True	Often True	Often True	Rarely True	Often True	Almost Always True	Often True	Often True	Often True	Almost Always True	Almost Never True	Often True	Rarely True	Often True	Often True	Often True	Often True	No	No	No	Yes	No	Yes	No	No	Yes	Yes	No	No	Yes	No	Most of the time	Some of the time	Some of the time	Seldom	Seldom	Some of the time	Never	Never	Rarely	Rarely	Sometimes	Sometimes	Sometimes	Sometimes
297	20	Women	highschool	no	Rarely True	Rarely True	Rarely True	Rarely True	Rarely True	Rarely True	Almost Always True	Often True	Rarely True	Rarely True	Almost Never True	Almost Always True	Rarely True	Often True	Often True	Often True	Often True	No	No	No	No	Yes	Yes	Yes	No	Yes	Yes	Yes	No	No		Never	Seldom	Never	Some of the time	Seldom	Seldom	Seldom	Seldom	Rarely	Never	Daily or almost daily	Often	Often	Sometimes
296	21	Women	highschool	no	Often True	Almost Always True	Often True	Almost Always True	Almost Always True	Often True	Almost Always True	Often True	Rarely True	Almost Always True	Almost Never True	Almost Always True	Almost Always True	Almost Never True	Almost Never True	Almost Always True	Almost Always True	No	No	No	No	No	No	No	Yes	No	No	No	No			Most of the time	Never	Never	Most of the time	Never	Never	Never	Most of the time	Never	Never	Daily or almost daily	Daily or almost daily	Often	Daily or almost daily
295	50	Women	postgraduate	no	Often True	Often True	Rarely True	Almost Never True	Almost Never True	Often True	Almost Always True	Rarely True	Rarely True	Almost Never True	Almost Never True	Often True	Almost Always True	Often True	Often True	Almost Always True	Almost Always True	No	No	Yes	Yes	No	No	No	No	Yes	Yes	No	No	Yes		Seldom	Some of the time	Some of the time	Some of the time	Never	Some of the time	Never	Never	Never	Never	Daily or almost daily	Often	Sometimes	Often
294	22	Women	highschool	no	Rarely True	Often True	Often True	Almost Always True	Often True	Almost Always True	Almost Always True	Rarely True	Often True	Almost Always True	Almost Never True	Almost Always True	Often True	Almost Always True	Often True	Almost Always True	Almost Always True	No	No	No	Yes	Yes	Yes	No	No	Yes	Yes	Yes	No	No	No	Seldom	Some of the time	Some of the time	Most of the time	Some of the time	Most of the time	Seldom	Seldom	Never	Never	Daily or almost daily	Rarely	Often	Sometimes
293	25	Women	University	no	Almost Always True	Often True	Rarely True	Often True	Often True	Almost Never True	Rarely True	Almost Never True	Often True	Often True	Rarely True	Often True	Rarely True	Often True	Rarely True	Often True	Often True	No	No	Yes	No	Yes	Yes	No	No	Yes	No	No	No	Yes		Most of the time	Most of the time		Most of the time					Rarely	Never	Daily or almost daily	Rarely	Often	Rarely
292	25	Women	highschool	no	Often True	Rarely True	Almost Always True	Often True	Often True	Often True	Often True	Often True	Often True	Often True	Almost Never True	Often True	Almost Always True	Often True	Often True	Often True	Rarely True	No	No	Yes	Yes	Yes	No	No	No	Yes	Yes	No	No	Yes		Most of the time	Some of the time	Seldom	Some of the time	Never	Most of the time	Some of the time	Seldom	Rarely	Never	Daily or almost daily	Sometimes	Sometimes	Sometimes
291	32	Women	University	no	Rarely True	Almost Never True	Often True	Rarely True	Almost Always True	Rarely True	Almost Always True	Almost Always True	Often True	Almost Always True	Almost Never True	Almost Never True	Almost Never True	Almost Never True	Rarely True	Almost Always True	Almost Never True	No	No	No	No	No	Yes	Yes	No	No	Yes	Yes	No	No		Most of the time	Never	Never	Most of the time	Some of the time	Most of the time	Never	Some of the time	Rarely	Rarely	Daily or almost daily	Daily or almost daily	Daily or almost daily	Rarely
290	21	Women	highschool	no	Often True	Often True	Rarely True	Almost Always True	Often True	Rarely True	Rarely True	Often True	Rarely True	Rarely True	Rarely True	Rarely True	Almost Always True	Often True	Often True	Often True	Often True	No	No	Yes	Yes	No	No	No	No	No	Yes	Yes				Never	Seldom	Never	Most of the time	Never	Seldom	Some of the time	Most of the time	Occasionally	Rarely	Often	Daily or almost daily	Often	Sometimes
29	23	Women	highschool	no	Often True	Almost Always True	Often True	Often True	Rarely True	Rarely True	Often True	Rarely True	Almost Always True	Often True	Almost Never True	Often True	Rarely True	Rarely True	Rarely True	Often True	Almost Always True	No	No	Yes	Yes	No	No	No	No	Yes	Yes	No	No			Never	Most of the time	Never	Some of the time	Never	Seldom	Seldom	Seldom	Rarely	Rarely	Daily or almost daily	Daily or almost daily	Daily or almost daily	Daily or almost daily
289	34	Women	University	no	Almost Never True	Almost Never True	Almost Never True	Almost Always True	Often True	Almost Always True	Almost Always True	Almost Always True	Often True	Often True	Almost Always True	Almost Always True	Almost Always True	Almost Always True	Often True	Almost Always True	Almost Always True	No	No	No	No	Yes	No	No	No	Yes	Yes	No	No			Seldom	Some of the time	Some of the time	Some of the time	Most of the time	Seldom	Seldom	Seldom	Rarely	Never	Daily or almost daily	Sometimes	Daily or almost daily	Often
288	23	Women	highschool	no	Almost Always True	Rarely True	Often True	Almost Never True	Almost Always True	Rarely True	Almost Never True	Rarely True	Almost Never True	Almost Always True	Almost Never True	Often True	Almost Never True	Often True	Often True	Almost Always True	Rarely True	No	No	Yes	Yes	Yes	Yes	Yes	No	Yes	Yes	No	No	No	No	Seldom	Most of the time	Seldom	Most of the time	Seldom	Some of the time	Some of the time	Most of the time	Rarely	Occasionally	Daily or almost daily	Occasionally	Occasionally	Sometimes
287	25	Women	highschool	no	Rarely True	Rarely True	Rarely True	Often True	Often True	Rarely True	Often True	Rarely True	Almost Always True	Often True	Almost Never True	Often True	Often True	Often True	Almost Always True	Almost Always True	Often True	No	No	Yes	Yes	No	Yes	Yes	No	Yes	Yes	No	No			Most of the time	Some of the time	Some of the time	Some of the time	Seldom	Some of the time	Seldom	Some of the time	Rarely	Rarely	Daily or almost daily	Sometimes	Often	Sometimes
286	21	Men	highschool	no	Often True	Often True	Almost Never True	Rarely True	Often True	Often True	Rarely True	Rarely True	Almost Always True	Often True	Almost Never True	Often True	Almost Never True	Almost Never True	Almost Never True	Often True	Often True	No	No	No	No	No	No	No	No	No	No	No	No	No		Most of the time			Most of the time				Most of the time	Occasionally	Occasionally	Daily or almost daily	Daily or almost daily	Sometimes	Sometimes
285	56	Women	University	no	Often True	Almost Always True	Almost Always True	Almost Always True	Often True	Often True	Almost Always True	Almost Always True	Almost Always True	Often True	Almost Always True	Often True	Almost Never True	Almost Always True	Almost Always True	Almost Always True	Almost Always True	No	No	Yes	Yes	Yes	Yes	No	No	Yes	Yes	Yes	Yes	No		Never	Most of the time	Never	Most of the time	Most of the time	Most of the time	Some of the time	Some of the time	Rarely	Rarely	Daily or almost daily	Sometimes	Daily or almost daily	Sometimes
284	44	Women	postgraduate	no	Often True	Almost Always True	Almost Never True	Almost Always True	Almost Always True	Almost Never True	Almost Always True	Often True	Often True	Almost Never True	Almost Never True	Almost Always True	Almost Never True	Almost Always True	Almost Always True	Almost Always True	Almost Always True	No	No	Yes	Yes	Yes	No	No	No	Yes	Yes	Yes	No	No	No	Never	Some of the time	Never	Some of the time	Some of the time	Most of the time	Seldom	Some of the time	Rarely	Never	Daily or almost daily	Never	Daily or almost daily	Occasionally
283	22	Women	highschool	no	Rarely True	Often True	Rarely True	Often True	Almost Always True	Almost Always True	Almost Always True	Almost Always True	Often True	Almost Always True	Almost Never True	Often True	Often True	Often True	Often True	Almost Always True	Almost Always True	No	No	Yes	Yes	No	No	No	No	No	No	Yes		Yes		Most of the time	Never	Never	Most of the time	Never	Some of the time		Some of the time	Never	Never	Daily or almost daily	Never	Often	Sometimes
282	27	Women	University	no	Rarely True	Often True	Often True	Often True	Often True	Often True	Rarely True	Often True	Often True	Rarely True	Almost Never True	Rarely True	Almost Never True	Rarely True	Often True	Often True	Often True	No	No	No	Yes	No	Yes	No	No	No	Yes	No	No	Yes	Yes	Never	Seldom	Some of the time	Some of the time	Some of the time	Seldom	Some of the time	Some of the time	Rarely	Occasionally	Occasionally	Rarely	Sometimes	Sometimes
281	20	Women	highschool	no	Rarely True	Often True	Almost Never True	Often True	Often True	Rarely True	Almost Always True	Rarely True	Almost Always True	Often True	Almost Never True	Often True	Often True	Often True	Rarely True	Often True	Often True	No	No	Yes	Yes	Yes	No	No	No	No	Yes	Yes			No	Never	Seldom	Seldom	Most of the time	Seldom	Seldom	Never	Most of the time	Often	Often	Daily or almost daily	Often	Often	Often
280	20	Women	highschool	no	Rarely True	Often True	Almost Always True	Almost Never True	Rarely True	Rarely True	Often True	Rarely True	Almost Never True	Often True	Almost Never True	Rarely True	Rarely True	Often True	Rarely True	Often True	Rarely True	No	No	No	No	No	Yes	Yes	No	Yes	Yes	Yes	No	No	No	Never	Seldom	Never	Most of the time	Most of the time	Most of the time	Never	Some of the time	Rarely	Never	Daily or almost daily	Often	Daily or almost daily	Daily or almost daily
28	38	Women	University	no	Rarely True	Rarely True	Rarely True	Rarely True	Rarely True	Almost Always True	Often True	Almost Always True	Almost Never True	Rarely True	Almost Never True	Almost Never True	Rarely True	Often True	Often True	Often True	Almost Never True	No	No	Yes	Yes	No	Yes	Yes	No	No	Yes	Yes		Yes		Most of the time	Seldom	Seldom	Some of the time	Some of the time	Some of the time	Seldom	Seldom	Rarely	Rarely	Often	Occasionally	Sometimes
279	22	Women	highschool	no	Often True	Often True	Rarely True	Almost Always True	Almost Never True	Almost Never True	Almost Always True	Almost Always True	Almost Never True	Almost Always True	Almost Never True	Often True	Often True	Almost Always True	Almost Always True	Almost Always True	Often True	No	No	Yes	Yes	Yes	No	Yes	No	Yes	Yes	Yes	Yes			Seldom	Some of the time	Seldom	Most of the time	Most of the time	Most of the time	Never	Most of the time	Never	Never	Daily or almost daily	Rarely	Daily or almost daily	Rarely
278	21	Women	highschool	no	Often True	Rarely True	Rarely True	Rarely True	Often True	Rarely True	Often True	Rarely True	Often True	Often True	Rarely True	Often True	Rarely True	Rarely True	Often True	Often True	Rarely True	No	No	No	No	No	No	No	No	Yes	Yes	No	No		Yes	Seldom	Seldom	Seldom	Most of the time	Some of the time	Some of the time	Some of the time	Some of the time	Rarely	Occasionally	Daily or almost daily	Daily or almost daily	Rarely	Occasionally
277	25	Women	highschool	no	Rarely True	Often True	Rarely True	Rarely True	Almost Never True	Often True	Almost Never True	Often True	Rarely True	Almost Never True	Rarely True	Often True	Rarely True	Rarely True	Often True	Almost Always True	Often True	No	No	Yes	Yes	No	Yes	No	No	Yes	Yes	Yes	No	No	No	Seldom	Some of the time	Never	Most of the time	Seldom	Some of the time	Seldom	Some of the time	Rarely	Never	Daily or almost daily	Sometimes	Daily or almost daily	Sometimes
276	27	Women	secondary	no	Often True	Often True	Almost Always True	Almost Always True	Almost Always True	Almost Always True	Almost Always True	Almost Always True	Almost Always True	Almost Always True	Rarely True	Often True	Often True	Rarely True	Almost Always True	Almost Always True	Often True	No	No	Yes	Yes	No	Yes	Yes	No	Yes	Yes	Yes	No	Yes	No	Most of the time	Seldom	Most of the time	Seldom	Never	Seldom	Some of the time	Seldom	Rarely	Rarely	Occasionally	Daily or almost daily	Often	Sometimes
275	46	Men	University	no	Often True	Often True	Almost Never True	Rarely True	Rarely True	Rarely True	Almost Always True	Often True	Often True	Almost Always True	Almost Never True	Almost Always True	Almost Never True	Almost Always True	Almost Always True	Often True	Almost Never True	No	No	Yes	Yes	No	Yes	No	No	Yes	Yes	Yes	Yes	No		Never	Seldom	Seldom	Most of the time	Most of the time	Most of the time	Most of the time	Most of the time	Rarely	Rarely	Daily or almost daily	Daily or almost daily	Often	Often
274	20	Women	highschool	no	Almost Never True	Rarely True	Rarely True	Rarely True	Often True	Almost Never True	Often True	Often True	Almost Always True	Rarely True	Almost Never True	Rarely True	Almost Never True	Almost Never True	Almost Never True	Rarely True	Almost Never True	No	No	No	No	No	No	No	Yes	No	No	No	No		Yes	Never	Never	Never	Most of the time	Some of the time	Most of the time	Some of the time	Most of the time	Sometimes	Sometimes	Daily or almost daily	Occasionally	Daily or almost daily	Often
273	25	Women	highschool	no	Rarely True	Often True	Rarely True	Almost Always True	Often True	Almost Always True	Almost Always True	Rarely True	Almost Always True	Often True	Almost Never True	Often True	Often True	Rarely True	Rarely True	Often True	Often True	No	No	Yes	Yes	No	No	No	No	No	No	Yes		Yes		Most of the time	Never	Never	Most of the time	Some of the time	Some of the time	Seldom	Most of the time	Never	Never	Daily or almost daily	Sometimes	Often	Sometimes
272	19	Women	postgraduate	no	Often True	Rarely True	Almost Always True	Rarely True	Almost Always True	Almost Never True	Almost Never True	Almost Never True	Rarely True	Almost Always True	Rarely True	Often True	Rarely True	Almost Never True	Almost Never True	Rarely True	Rarely True	No	No	No	No	No	No	No	Yes	No	No	Yes	No	No	No	Never	Never	Never	Some of the time	Most of the time	Most of the time	Most of the time	Most of the time	Often	Often	Often	Daily or almost daily	Never	Daily or almost daily
271	23	Women	highschool	no	Almost Never True	Rarely True	Rarely True	Often True	Often True	Often True	Often True	Rarely True	Almost Always True	Often True	Rarely True	Rarely True	Rarely True	Rarely True	Rarely True	Often True	Rarely True	No	No	Yes	Yes	No	Yes	Yes	No	Yes	Yes	Yes	No	Yes	Yes	Most of the time	Some of the time	Seldom	Most of the time	Most of the time	Most of the time	Seldom	Most of the time	Sometimes	Never	Daily or almost daily	Never	Daily or almost daily	Never
270	24	Women	highschool	no	Rarely True	Rarely True	Almost Never True	Rarely True	Almost Never True	Almost Never True	Often True	Almost Never True	Almost Always True	Almost Never True	Almost Never True	Rarely True	Almost Never True	Rarely True	Rarely True	Rarely True	Rarely True	No	No	Yes	Yes	Yes	Yes	No	No	No	Yes	Yes	Yes			Never	Seldom	Seldom	Most of the time	Most of the time	Some of the time	Most of the time	Most of the time	Often	Sometimes	Sometimes	Often	Sometimes	Rarely
27	55	Women	University	no	Often True	Rarely True	Rarely True	Often True	Rarely True	Often True	Almost Always True	Almost Always True	Rarely True	Rarely True	Almost Never True	Often True	Almost Never True	Often True	Often True	Almost Always True	Rarely True	No	No	Yes	Yes	Yes	Yes	Yes	No	No	Yes	Yes	Yes
269	20	Women	highschool	no	Rarely True	Almost Never True	Often True	Almost Never True	Almost Never True	Rarely True	Almost Always True	Often True	Often True	Almost Never True	Almost Never True	Rarely True	Rarely True	Often True	Often True	Almost Always True	Rarely True	No	No	Yes	Yes	Yes	No	No	No	Yes	Yes	Yes	Yes	No	No	Never	Some of the time	Never	Most of the time	Most of the time	Some of the time	Most of the time	Most of the time	Never	Rarely	Daily or almost daily	Daily or almost daily	Daily or almost daily	Daily or almost daily
268	15	Women	postgraduate	no	Almost Always True	Often True	Rarely True	Almost Never True	Almost Never True	Almost Always True	Almost Always True	Almost Never True	Often True	Almost Never True	Almost Never True	Often True	Almost Never True	Rarely True	Almost Never True	Almost Always True	Almost Never True	No	No	Yes	Yes	No	Yes	Yes	No	Yes	No	Yes	No	No		Never	Some of the time	Some of the time	Most of the time	Most of the time	Never	Never	Most of the time	Never	Never	Rarely	Daily or almost daily	Daily or almost daily	Daily or almost daily
267	42	Women	University	no	Rarely True	Often True	Rarely True	Rarely True	Almost Never True	Almost Never True	Rarely True	Rarely True	Often True	Almost Never True	Almost Never True	Often True	Rarely True	Almost Never True	Almost Never True	Rarely True	Often True	No	No	No	No	No	No	No	Yes	No	No	No	No	No	No	Seldom	Seldom	Never	Most of the time	Some of the time	Some of the time	Some of the time	Some of the time	Sometimes	Rarely	Daily or almost daily	Often	Often	Sometimes
266	20	Women	highschool	no	Often True	Often True	Rarely True	Rarely True	Almost Never True	Often True	Often True	Often True	Almost Always True	Often True	Almost Never True	Almost Never True	Rarely True	Rarely True	Often True	Often True	Rarely True	No	No	Yes	No	Yes	Yes	Yes	No	No	No	Yes		Yes		Some of the time	Seldom	Seldom	Most of the time	Some of the time	Most of the time	Some of the time	Some of the time	Rarely	Never	Daily or almost daily	Often	Daily or almost daily	Often
265	21	Women	highschool	no	Rarely True	Almost Always True	Often True	Almost Always True	Almost Always True	Almost Always True	Almost Always True	Almost Always True	Often True	Often True	Almost Never True	Almost Always True	Almost Always True	Rarely True	Rarely True	Almost Always True	Almost Always True	No	No	Yes	No	No	No	No	Yes	No	No	No	No	Yes		Most of the time	Some of the time	Never	Most of the time	Some of the time	Some of the time	Never	Most of the time	Never	Never	Daily or almost daily	Often	Daily or almost daily	Never
264	21	Women	highschool	no	Often True	Rarely True	Often True	Rarely True	Often True	Often True	Almost Always True	Often True	Often True	Almost Always True	Almost Never True	Often True	Rarely True	Rarely True	Almost Never True	Almost Always True	Often True	No	No	No	Yes	No	Yes	No	No	Yes	Yes	No	No	No		Seldom	Never	Never	Some of the time	Never	Seldom	Never	Some of the time	Never	Never	Daily or almost daily	Sometimes	Daily or almost daily	Often
263	28	Women	University	no	Rarely True	Almost Always True	Almost Always True	Often True	Almost Always True	Often True	Almost Always True	Almost Always True	Often True	Almost Always True	Almost Never True	Often True	Often True	Almost Never True	Often True	Often True	Rarely True	No	No	Yes	Yes	No	Yes	Yes	No	No	Yes	No	No	Yes		Most of the time	Never	Never	Most of the time	Never	Most of the time	Most of the time	Most of the time
262	22	Women	highschool	no	Almost Never True	Rarely True	Almost Always True	Rarely True	Rarely True	Rarely True	Almost Always True	Rarely True	Rarely True	Rarely True	Almost Never True	Rarely True	Rarely True	Often True	Often True	Almost Always True	Rarely True	No	No	Yes	Yes	No	Yes	Yes	No	Yes	No	No	No			Never	Seldom	Never	Some of the time	Seldom	Most of the time	Seldom	Some of the time	Rarely	Rarely	Daily or almost daily	Sometimes	Daily or almost daily	Often
261	20	Women	highschool	no	Often True	Rarely True	Often True	Almost Never True	Often True	Often True	Almost Always True	Almost Never True	Almost Always True	Almost Always True	Almost Never True	Often True	Rarely True	Often True	Often True	Often True	Rarely True	No	No	Yes	Yes	No	Yes	Yes	No	Yes	Yes	No	No	No		Seldom	Seldom	Never	Seldom	Seldom	Seldom	Never	Seldom	Occasionally	Occasionally	Occasionally	Rarely	Occasionally	Never
260	35	Women	University	no	Rarely True	Rarely True	Rarely True	Rarely True	Almost Never True	Almost Never True	Almost Always True	Almost Never True	Rarely True	Often True	Almost Never True	Almost Never True	Almost Never True	Almost Never True	Rarely True	Almost Always True	Often True	No	No	No	No	No	No	No	No	Yes	No	Yes	Yes			Never	Seldom	Never	Some of the time	Seldom	Some of the time	Never	Some of the time	Sometimes	Occasionally	Often	Often	Often	Often
26	33	Women	University	no	Rarely True	Rarely True	Rarely True	Rarely True	Rarely True	Often True	Almost Always True	Often True	Almost Always True	Often True	Almost Always True	Often True	Rarely True	Often True	Often True	Often True	Often True	No	No	Yes	Yes	No	Yes	No	No	Yes	No	Yes				Seldom	Most of the time	Seldom	Most of the time	Most of the time		Most of the time	Most of the time	Occasionally	Occasionally	Daily or almost daily	Daily or almost daily	Daily or almost daily	Rarely
259	14	Women	University	no	Rarely True	Almost Always True	Almost Always True	Almost Always True	Almost Always True	Almost Always True	Almost Always True	Almost Always True	Almost Always True	Almost Always True	Almost Never True	Almost Always True	Often True	Almost Always True	Almost Always True	Almost Always True	Almost Always True	No	No	Yes	Yes	No	No	Yes	No	No	Yes	Yes	No	No		Never	Some of the time	Never	Most of the time	Most of the time	Most of the time	Most of the time	Most of the time	Sometimes	Occasionally	Daily or almost daily	Daily or almost daily	Daily or almost daily	Daily or almost daily
258	32	Women	University	no	Rarely True	Often True	Often True	Rarely True	Rarely True	Rarely True	Often True	Often True	Almost Always True	Rarely True	Rarely True	Rarely True	Rarely True	Rarely True	Rarely True	Almost Always True	Rarely True	No	No	Yes	No	No	Yes	Yes	No	No	No	No	No	Yes		Some of the time	Some of the time	Seldom	Some of the time	Seldom	Seldom	Some of the time	Some of the time	Sometimes	Often	Daily or almost daily	Sometimes	Often	Sometimes
257	22	Women	highschool	no	Often True	Often True	Rarely True	Almost Never True	Almost Never True	Almost Never True	Often True	Rarely True	Almost Always True	Almost Never True	Almost Never True	Almost Never True	Almost Never True	Almost Never True	Rarely True	Rarely True	Rarely True	No	No	No	No	No	No	No	Yes	No	Yes	Yes	Yes	No		Seldom	Never	Never	Most of the time	Some of the time	Some of the time	Most of the time	Some of the time	Often	Often	Often	Sometimes	Occasionally	Rarely
256	26	Women	highschool	no	Often True	Rarely True	Almost Never True	Rarely True	Almost Never True	Almost Never True	Almost Always True	Rarely True	Rarely True	Almost Always True	Almost Never True	Almost Never True	Almost Never True	Almost Never True	Rarely True	Almost Always True	Almost Never True	No	No	No	No	No	Yes	Yes	No	No	No	Yes	Yes			Never	Never	Never	Most of the time	Never	Some of the time	Never	Most of the time	Rarely	Never	Rarely	Sometimes	Often	Often
255	23	Women	highschool	no	Rarely True	Often True	Rarely True	Often True	Often True	Often True	Almost Always True	Often True	Rarely True	Often True	Almost Never True	Often True	Often True	Often True	Often True	Often True	Often True	No	No	Yes	Yes	Yes	Yes	Yes	No	No	No	No	Yes	No	No	Never	Seldom	Seldom	Most of the time	Most of the time	Most of the time	Most of the time	Most of the time	Rarely	Sometimes	Sometimes	Sometimes	Sometimes	Sometimes
254	43	Women	University	no	Rarely True	Almost Always True	Often True	Almost Always True	Often True	Often True	Almost Always True	Often True	Often True	Almost Always True	Almost Never True	Often True	Almost Never True	Often True	Often True	Often True	Almost Never True	No	No	Yes	Yes	Yes	Yes	Yes	No	No	Yes	No	No				Seldom			Seldom	Seldom			Rarely	Occasionally	Daily or almost daily	Often	Daily or almost daily	Sometimes
253	19	Women	University	no	Often True	Almost Never True	Rarely True	Almost Always True	Often True	Often True	Almost Always True	Often True	Almost Always True	Almost Always True	Almost Never True	Almost Never True	Almost Never True	Rarely True	Often True	Rarely True	Often True	No	No	No	Yes	No	No	No	No	No	No	No	Yes	No	No	Never	Never	Never	Most of the time	Most of the time	Seldom	Some of the time	Some of the time	Occasionally	Sometimes	Daily or almost daily	Often	Often	Daily or almost daily
252	29	Women	University	no	Often True	Often True	Rarely True	Often True	Rarely True	Rarely True	Often True	Rarely True	Often True	Almost Never True	Almost Never True	Rarely True	Rarely True	Often True	Rarely True	Rarely True	Rarely True	No	No	Yes	Yes	Yes	Yes	No	No	No	No	No	No	No	No	Seldom	Seldom	Seldom	Seldom	Seldom	Seldom	Seldom	Seldom	Occasionally	Rarely	Sometimes	Sometimes	Occasionally	Rarely
251	25	Women	highschool	no	Often True	Rarely True	Often True	Almost Always True	Often True	Rarely True	Often True	Rarely True	Almost Never True	Rarely True	Almost Never True	Rarely True	Almost Never True	Almost Always True	Almost Always True	Almost Always True	Rarely True	No	No	Yes	Yes	Yes	Yes	Yes	No	Yes	Yes	Yes		Yes		Some of the time	Most of the time		Most of the time			Most of the time		Occasionally	Never	Often	Occasionally	Often	Rarely
250	23	Women	highschool	no	Rarely True	Almost Never True	Rarely True	Rarely True	Often True	Almost Never True	Rarely True	Almost Never True	Almost Always True	Almost Always True	Often True	Almost Never True	Almost Never True	Often True	Often True	Almost Always True	Rarely True	No	No	Yes	Yes	No	No	No	No	Yes	Yes	No	No			Never	Some of the time	Some of the time	Seldom	Some of the time	Most of the time	Never	Seldom	Sometimes	Sometimes	Often	Occasionally	Daily or almost daily	Often
25	21	Men	highschool	no	Almost Always True	Rarely True	Rarely True	Almost Never True	Almost Never True	Almost Never True	Almost Always True	Rarely True	Often True	Rarely True	Almost Never True	Often True	Almost Never True	Rarely True	Almost Never True	Often True	Rarely True	No	No	No	No	No	No	No	Yes	No	Yes	Yes	No	No	No	Never	Never	Never	Most of the time	Most of the time	Most of the time	Most of the time	Most of the time	Rarely	Rarely	Daily or almost daily	Often	Daily or almost daily	Sometimes
249	23	Women	highschool	no	Rarely True	Rarely True	Often True	Often True	Rarely True	Rarely True	Almost Always True	Often True	Almost Never True	Often True	Almost Never True	Often True	Almost Never True	Rarely True	Often True	Often True	Rarely True	No	No	No	No	No	No	No	No	Yes	Yes	No	No	No		Never	Never	Seldom	Some of the time	Seldom	Most of the time	Never	Some of the time	Rarely	Rarely	Often	Daily or almost daily	Sometimes	Sometimes
248	42	Women	University	no	Almost Never True	Often True	Almost Never True	Almost Always True	Often True	Almost Always True	Almost Always True	Almost Always True	Rarely True	Often True	Almost Never True	Often True	Rarely True	Rarely True	Often True	Almost Always True	Almost Always True	No	No	Yes	Yes	No	No	No	No	No	No	Yes	No	Yes		Most of the time	Never	Never	Some of the time	Some of the time	Seldom	Some of the time	Most of the time	Rarely	Never	Occasionally	Sometimes	Often	Sometimes
247	28	Men	University	no	Almost Never True	Almost Always True	Almost Always True	Almost Always True	Almost Always True	Rarely True	Rarely True	Rarely True	Almost Always True	Almost Always True	Almost Never True	Rarely True	Almost Never True	Often True	Almost Always True	Almost Always True	Almost Never True	No	No	Yes	Yes	No	Yes	Yes	No	Yes	Yes	Yes	Yes	No	No	Never	Never	Some of the time	Some of the time	Some of the time	Some of the time	Never	Some of the time	Never	Never	Daily or almost daily	Rarely	Never	Often
246	23	Women	postgraduate	no	Almost Always True	Rarely True	Almost Never True	Almost Always True	Almost Always True	Almost Always True	Almost Always True	Almost Always True	Almost Always True	Almost Always True	Almost Never True	Rarely True	Almost Never True	Often True	Rarely True	Often True	Almost Always True	No	No	No	No	No	No	No	No	No	No	Yes	No	Yes		Seldom	Never	Never	Most of the time	Most of the time	Most of the time	Never	Most of the time	Rarely	Never	Daily or almost daily	Often	Often	Often
245	25	Women	University	no	Rarely True	Rarely True	Often True	Often True	Often True	Often True	Often True	Often True	Often True	Often True	Almost Never True	Often True	Often True	Often True	Rarely True	Rarely True	Often True	No	No	Yes	Yes	Yes	No	No	No	No	No	No				Never	Seldom	Seldom	Most of the time	Most of the time	Most of the time	Most of the time	Some of the time	Sometimes	Sometimes	Sometimes	Sometimes	Sometimes	Sometimes
244	23	Women	highschool	no	Often True	Often True	Rarely True	Rarely True	Rarely True	Rarely True	Often True	Rarely True	Almost Always True	Often True	Almost Never True	Often True	Almost Never True	Rarely True	Rarely True	Often True	Rarely True	No	No	Yes	Yes	No	Yes	Yes	No	No	Yes	Yes	No	No	No	Never	Never	Never	Some of the time	Never	Seldom	Never	Some of the time	Rarely	Rarely	Daily or almost daily	Daily or almost daily	Often	Rarely
243	31	Women	University	no	Often True	Rarely True	Often True	Rarely True	Often True	Almost Always True	Almost Always True	Almost Always True	Almost Never True	Rarely True	Almost Never True	Almost Always True	Rarely True	Almost Always True	Almost Always True	Almost Always True	Rarely True	No	No	No	Yes	Yes	Yes	Yes	No	Yes	Yes	No	No	Yes		Seldom	Most of the time	Most of the time	Never	Never	Most of the time	Never	Never	Never	Never	Daily or almost daily	Sometimes	Daily or almost daily	Sometimes
242	23	Women	highschool	no	Rarely True	Often True	Often True	Often True	Almost Always True	Almost Always True	Almost Always True	Almost Always True	Almost Always True	Almost Always True	Rarely True	Often True	Often True	Often True	Often True	Often True	Often True	No	No	Yes	Yes	Yes	No	Yes	No	No	Yes	Yes	Yes	Yes		Most of the time	Some of the time	Seldom	Most of the time	Seldom	Some of the time	Some of the time	Some of the time	Rarely	Rarely	Daily or almost daily	Sometimes	Often	Often
241	24	Women	highschool	no	Rarely True	Almost Never True	Almost Never True	Rarely True	Almost Always True	Often True	Almost Always True	Rarely True	Almost Never True	Almost Always True	Almost Never True	Rarely True	Almost Never True	Almost Never True	Almost Always True	Almost Always True	Almost Always True	No	No	Yes	Yes	No	No	Yes	No	No	Yes	Yes	No	No	No	Most of the time	Never	Never	Some of the time	Most of the time	Most of the time	Never	Never	Never	Never	Daily or almost daily	Never	Daily or almost daily	Never
240	43	Women	University	no	Often True	Often True	Almost Never True	Almost Never True	Almost Never True	Almost Always True	Almost Always True	Almost Always True	Often True	Almost Always True	Almost Always True	Almost Always True	Almost Always True	Almost Always True	Almost Always True	Often True	Almost Never True	No	No	Yes	Yes	Yes	Yes	Yes	No	Yes	Yes	No	No	Yes		Some of the time	Most of the time	Seldom	Some of the time	Seldom	Seldom	Never	Most of the time	Never	Never	Daily or almost daily	Never	Daily or almost daily	Sometimes
24	32	Women	University	no	Almost Never True	Often True	Almost Never True	Rarely True	Almost Never True	Often True	Almost Always True	Rarely True	Almost Always True	Almost Never True	Almost Never True	Rarely True	Almost Never True	Rarely True	Rarely True	Often True	Rarely True	No	No	Yes	Yes	No	No	No	No	No	No	Yes				Never	Never	Never	Most of the time	Some of the time	Some of the time	Never	Never	Rarely	Sometimes	Daily or almost daily	Never	Sometimes	Sometimes
239	18	Women	postgraduate	no	Often True	Rarely True	Often True	Almost Never True	Almost Always True	Almost Always True	Almost Always True	Almost Always True	Almost Always True	Almost Always True	Almost Never True	Almost Always True	Almost Never True	Almost Always True	Often True	Almost Always True	Often True	No	No	Yes	Yes	No	Yes	Yes	No	Yes	Yes	No	Yes	Yes		Some of the time	Most of the time	Most of the time	Seldom	Seldom	Some of the time	Never	Never	Sometimes	Rarely	Daily or almost daily	Occasionally	Occasionally	Rarely
238	29	Women	University	no	Almost Always True	Often True	Often True	Almost Always True	Almost Always True	Almost Always True	Almost Always True	Almost Always True	Often True	Almost Always True	Almost Never True	Almost Always True	Often True	Almost Always True	Almost Always True	Almost Always True	Often True	No	No	Yes	No	Yes	No	No	No	No	Yes	Yes	No	No		Never	Some of the time	Never	Most of the time	Seldom	Some of the time	Never	Some of the time	Never	Never	Never	Often	Daily or almost daily	Never
237	25	Women	highschool	no	Rarely True	Rarely True	Almost Never True	Rarely True	Almost Never True	Rarely True	Almost Always True	Rarely True	Almost Always True	Almost Never True	Almost Never True	Almost Always True	Often True	Almost Never True	Rarely True	Often True	Often True	No	No	Yes	Yes	Yes	No	No	Yes	Yes	Yes	No	No			Never	Never	Never	Some of the time	Some of the time	Most of the time	Never	Never	Rarely	Rarely	Daily or almost daily	Often	Daily or almost daily	Often
236	21	Women	highschool	no	Often True	Rarely True	Rarely True	Often True	Almost Always True	Rarely True	Often True	Often True	Often True	Almost Always True	Almost Never True	Often True	Rarely True	Rarely True	Often True	Often True	Rarely True	No	No	Yes	Yes	No	No	No	No	Yes	Yes	Yes				Never	Some of the time	Never	Most of the time	Seldom	Some of the time	Some of the time	Some of the time	Occasionally	Sometimes	Daily or almost daily	Sometimes	Daily or almost daily	Never
235	22	Women	highschool	no	Often True	Often True	Almost Never True	Often True	Often True	Rarely True	Almost Never True	Rarely True	Almost Always True	Rarely True	Almost Never True	Almost Always True	Rarely True	Rarely True	Rarely True	Often True	Rarely True	No	No	Yes	Yes	Yes	Yes	Yes	No	Yes	No	No	No			Never	Seldom	Never	Most of the time	Most of the time	Some of the time	Never	Some of the time	Never	Never	Daily or almost daily	Often	Never	Rarely
234	23	Women	highschool	no	Often True	Often True	Rarely True	Almost Always True	Almost Always True	Almost Never True	Almost Always True	Almost Never True	Rarely True	Almost Always True	Almost Never True	Almost Always True	Almost Always True	Almost Always True	Almost Always True	Almost Always True	Almost Always True	No	No	Yes	Yes	Yes	No	Yes	No	Yes	Yes	Yes	No	Yes		Seldom	Some of the time	Some of the time	Some of the time	Never	Most of the time	Seldom	Some of the time	Rarely	Rarely	Daily or almost daily	Rarely	Rarely	Sometimes
233	20	Women	highschool	no	Almost Never True	Almost Never True	Rarely True	Almost Never True	Almost Never True	Often True	Often True	Almost Always True	Almost Never True	Almost Always True	Almost Never True	Almost Always True	Often True	Often True	Rarely True	Often True	Often True	No	No	Yes	Yes	Yes	No	Yes	No	Yes	Yes	No	No	Yes		Seldom	Seldom	Seldom	Most of the time	Most of the time	Most of the time	Seldom	Seldom	Occasionally	Rarely	Daily or almost daily	Sometimes	Daily or almost daily	Daily or almost daily
232	28	Women	University	no	Often True	Almost Always True	Rarely True	Almost Always True	Often True	Often True	Almost Always True	Rarely True	Rarely True	Rarely True	Almost Never True	Almost Always True	Almost Always True	Almost Always True	Almost Always True	Often True	Almost Always True	No	No	Yes	Yes	Yes	Yes	Yes	No	Yes	Yes	Yes		Yes		Most of the time	Seldom	Never	Most of the time	Some of the time	Never	Never	Most of the time	Rarely	Never	Daily or almost daily	Never	Never	Sometimes
231	19	Women	postgraduate	no	Often True	Often True	Often True	Almost Always True	Often True	Rarely True	Almost Always True	Often True	Almost Always True	Rarely True	Almost Never True	Often True	Almost Never True	Almost Never True	Rarely True	Almost Always True	Often True	No	No	No	No	No	Yes	No	No	Yes	No	No	No			Most of the time	Never	Never	Seldom	Seldom	Most of the time	Never	Never	Rarely	Never	Daily or almost daily	Often	Often	Sometimes
230	39	Women	postgraduate	no	Rarely True	Almost Never True	Almost Never True	Almost Never True	Almost Never True	Almost Never True	Almost Never True	Almost Never True	Often True	Almost Never True	Rarely True	Rarely True	Rarely True	Rarely True	Rarely True	Rarely True	Rarely True	No	No	No	No	No	No	No	No	No	No	Yes	Yes	No	No	Never	Never	Never	Most of the time	Never	Never	Most of the time	Most of the time	Never	Never	Never	Never	Never	Never
23	21	Men	highschool	no	Almost Always True	Rarely True	Rarely True	Often True	Rarely True	Often True	Almost Never True	Rarely True	Often True	Rarely True	Almost Never True	Almost Never True	Almost Never True	Rarely True	Rarely True	Often True	Often True	No	No	Yes	Yes	No	Yes	No	No	No	Yes	No	No	Yes		Some of the time	Some of the time	Some of the time	Some of the time	Seldom	Some of the time	Seldom	Seldom	Sometimes	Occasionally	Often	Sometimes	Sometimes	Sometimes
229	23	Women	highschool	no	Often True	Often True	Often True	Rarely True	Almost Never True	Often True	Often True	Rarely True	Almost Always True	Rarely True	Almost Never True	Often True	Rarely True	Almost Always True	Almost Always True	Almost Always True	Rarely True	No	No	Yes	Yes	Yes	No	No	No	No	No	No	No	Yes		Most of the time	Most of the time	Never	Most of the time	Some of the time	Some of the time	Never	Most of the time	Sometimes	Rarely	Daily or almost daily	Often	Daily or almost daily	Daily or almost daily
228	22	Women	highschool	no	Rarely True	Often True	Often True	Often True	Rarely True	Often True	Often True	Rarely True	Almost Always True	Often True	Almost Never True	Rarely True	Rarely True	Almost Never True	Often True	Rarely True	Often True	No	No	Yes	Yes	Yes	No	Yes	No	No	Yes	Yes	No	No		Never	Seldom	Never	Most of the time	Some of the time	Some of the time	Seldom	Most of the time	Rarely	Rarely	Daily or almost daily	Often	Daily or almost daily	Often
227	21	Women	highschool	no	Almost Always True	Often True	Rarely True	Almost Always True	Almost Always True	Often True	Often True	Often True	Almost Always True	Almost Always True	Almost Never True	Almost Always True	Almost Never True	Rarely True	Often True	Almost Always True	Rarely True	No	No	Yes	Yes	Yes	Yes	Yes	No	No	No	Yes	Yes	Yes		Most of the time	Seldom	Never	Most of the time	Some of the time	Most of the time	Never	Most of the time	Rarely	Never	Daily or almost daily	Sometimes	Daily or almost daily	Often
226	29	Women	University	no	Rarely True	Almost Always True	Rarely True	Almost Always True	Often True	Often True	Almost Always True	Almost Always True	Almost Always True	Almost Always True	Almost Never True	Almost Always True	Almost Never True	Rarely True	Rarely True	Almost Always True	Often True	No	No	No	No	No	Yes	No	No	Yes	No	No	No	No		Seldom	Never	Seldom	Most of the time	Some of the time	Some of the time	Never	Some of the time	Never	Never	Daily or almost daily	Often	Sometimes	Often
225	22	Women	University	no	Almost Always True	Often True	Rarely True	Often True	Often True	Rarely True	Often True	Often True	Often True	Almost Always True	Almost Never True	Rarely True	Often True	Often True	Often True	Often True	Often True	No	No	Yes	Yes	Yes	Yes	Yes	No	Yes	Yes	Yes	No	Yes	No	Most of the time	Most of the time	Never	Some of the time	Some of the time	Some of the time	Seldom	Some of the time	Sometimes	Rarely	Daily or almost daily	Daily or almost daily	Sometimes	Daily or almost daily
224	22	Women	highschool	no	Rarely True	Often True	Almost Always True	Almost Always True	Almost Always True	Almost Always True	Almost Always True	Almost Always True	Almost Never True	Almost Always True	Almost Never True	Often True	Rarely True	Almost Always True	Almost Always True	Almost Always True	Often True	No	No	Yes	Yes	Yes	Yes	Yes	No	Yes	Yes	Yes	Yes	Yes		Most of the time	Most of the time	Most of the time	Most of the time	Never	Some of the time	Never	Some of the time	Never	Never	Daily or almost daily	Sometimes	Sometimes	Sometimes
223	23	Women	highschool	no	Often True	Almost Always True	Often True	Often True	Almost Always True	Often True	Often True	Rarely True	Often True	Almost Always True	Rarely True	Often True	Often True	Often True	Often True	Almost Always True	Often True	No	No	Yes	Yes	No	Yes	Yes	No	Yes	Yes	No	No				Most of the time	Most of the time	Some of the time	Never	Some of the time	Some of the time	Some of the time	Rarely	Rarely	Daily or almost daily	Daily or almost daily	Daily or almost daily	Sometimes
222	19	Women	postgraduate	no	Rarely True	Often True	Often True	Almost Never True	Almost Never True	Often True	Almost Always True	Almost Never True	Almost Always True	Rarely True	Almost Never True	Often True	Almost Never True	Almost Always True	Almost Always True	Almost Always True	Almost Never True	No	No	Yes	Yes	Yes	Yes	Yes	No	Yes	Yes	No	No	Yes		Most of the time	Most of the time	Seldom	Never	Some of the time	Some of the time	Never	Seldom	Sometimes	Rarely	Daily or almost daily	Sometimes	Often	Often
221	21	Women	highschool	no	Almost Never True	Almost Always True	Almost Always True	Almost Always True	Often True	Often True	Almost Always True	Rarely True	Almost Always True	Rarely True	Almost Never True	Rarely True	Almost Always True	Often True	Often True	Almost Always True	Almost Always True	No	No	Yes	Yes	No	No	Yes	No	No	Yes	Yes				Seldom	Seldom	Seldom	Some of the time	Most of the time	Most of the time	Some of the time	Some of the time	Rarely	Rarely	Daily or almost daily	Daily or almost daily	Occasionally	Sometimes
220	22	Women	highschool	no	Often True	Often True	Rarely True	Often True	Often True	Often True	Often True	Often True	Rarely True	Often True	Almost Never True	Rarely True	Often True	Often True	Often True	Often True	Often True	No	No	Yes	Yes	Yes	Yes	No	No	No	Yes	No	Yes	No	No	Never	Never	Never	Most of the time	Some of the time	Some of the time	Never	Some of the time	Never	Never	Daily or almost daily	Often	Daily or almost daily	Often
22	39	Women	University	no	Almost Always True	Often True	Almost Always True	Almost Always True	Often True	Often True	Almost Always True	Often True	Often True	Almost Always True	Almost Never True	Almost Always True	Almost Never True	Rarely True	Almost Always True	Almost Always True	Almost Always True	No	No	Yes	Yes	Yes	No	No	No	Yes	Yes	Yes	No	No	No	Never	Never	Most of the time	Some of the time	Some of the time	Some of the time	Never	Never	Never	Never	Daily or almost daily	Occasionally	Never	Daily or almost daily
219	23	Women	highschool	no	Rarely True	Often True	Rarely True	Often True	Rarely True	Rarely True	Rarely True	Rarely True	Often True	Rarely True	Rarely True	Rarely True	Rarely True	Rarely True	Rarely True	Often True	Often True	No	No	Yes	No	No	Yes	No	No	Yes	Yes	Yes	No	Yes	No	Most of the time	Some of the time	Seldom	Some of the time	Seldom	Some of the time	Seldom	Some of the time	Often	Sometimes	Daily or almost daily	Sometimes	Sometimes	Sometimes
218	30	Women	University	no	Rarely True	Often True	Often True	Almost Always True	Often True	Often True	Often True	Often True	Almost Always True	Often True	Rarely True	Often True	Almost Always True	Rarely True	Rarely True	Often True	Often True	No	No	Yes	Yes	Yes	No	No	No	No	Yes	No	No	Yes		Some of the time	Some of the time	Some of the time	Most of the time	Some of the time	Most of the time	Seldom	Seldom	Never	Never	Daily or almost daily	Never	Daily or almost daily	Never
217	23	Women	highschool	no	Often True	Rarely True	Almost Never True	Often True	Almost Never True	Almost Never True	Rarely True	Almost Never True	Rarely True	Almost Never True	Almost Never True	Almost Never True	Almost Never True	Almost Never True	Almost Never True	Rarely True	Rarely True	No	No	Yes	Yes	No	No	No	No	No	Yes	No	No	No	No		Never	Never	Seldom	Some of the time	Most of the time	Never	Seldom	Daily or almost daily	Daily or almost daily	Daily or almost daily	Often	Occasionally	Sometimes
216	27	Women	secondary	no	Often True	Often True	Often True	Often True	Rarely True	Rarely True	Often True	Often True	Rarely True	Rarely True	Almost Never True	Often True	Often True	Rarely True	Rarely True	Often True	Often True	No	No	Yes	Yes	No	No	No	No	No	Yes	No	No			Never	Never	Never	Most of the time	Never	Never	Never	Never	Rarely	Rarely	Daily or almost daily	Sometimes	Daily or almost daily	Sometimes
215	23	Women	highschool	no	Rarely True	Almost Always True	Rarely True	Almost Always True	Often True	Almost Always True	Almost Always True	Rarely True	Almost Always True	Rarely True	Often True	Rarely True	Often True	Rarely True	Often True	Often True	Almost Always True	No	No	Yes	Yes	No	Yes	No	No	No	No	No	No	Yes		Some of the time	Some of the time	Never	Never	Never	Seldom	Never	Never	Occasionally	Rarely	Daily or almost daily	Rarely	Sometimes	Often
214	25	Women	University	no	Rarely True	Often True	Rarely True	Rarely True	Rarely True	Rarely True	Almost Always True	Often True	Rarely True	Rarely True	Almost Never True	Often True	Almost Never True	Rarely True	Rarely True	Rarely True	Rarely True	No	No	No	No	Yes	Yes	Yes	No	No	No	Yes	Yes			Never	Seldom	Seldom	Most of the time	Some of the time	Some of the time	Most of the time	Most of the time	Sometimes	Sometimes	Daily or almost daily	Often	Often	Often
213	20	Women	highschool	no	Often True	Often True	Often True	Often True	Almost Never True	Almost Always True	Almost Always True	Almost Always True	Rarely True	Rarely True	Almost Never True	Almost Always True	Rarely True	Almost Always True	Almost Always True	Almost Always True	Often True	No	No	Yes	Yes	Yes	Yes	Yes	No	Yes	Yes	No	No	Yes		Most of the time	Most of the time	Some of the time	Seldom	Seldom	Most of the time	Seldom	Seldom	Rarely	Never	Daily or almost daily	Sometimes	Daily or almost daily	Occasionally
212	28	Women	University	no	Almost Never True	Often True	Often True	Often True	Often True	Often True	Often True	Almost Always True	Often True	Almost Always True	Almost Never True	Often True	Rarely True	Often True	Often True	Often True	Often True	No	No	No	No	Yes	No	Yes	No	Yes	Yes	No	No			Seldom	Never	Seldom	Never	Never	Seldom	Never	Seldom	Sometimes	Never	Daily or almost daily	Daily or almost daily	Occasionally	Sometimes
211	23	Women	highschool	no	Almost Always True	Rarely True	Rarely True	Often True	Rarely True	Often True	Often True	Often True	Rarely True	Often True	Almost Never True	Often True	Rarely True	Often True	Often True	Often True	Rarely True	No	No	Yes	Yes	Yes	Yes	Yes	No	No	Yes	Yes	Yes						Most of the time	Most of the time	Most of the time		Most of the time	Often	Often	Daily or almost daily	Often	Often	Rarely
210	30	Women	University	no	Often True	Rarely True	Rarely True	Rarely True	Rarely True	Rarely True	Often True	Often True	Almost Always True	Almost Always True	Almost Never True	Often True	Rarely True	Often True	Rarely True	Often True	Rarely True	No	No	Yes	Yes	Yes	No	No	No	No	Yes	Yes	No	No		Seldom	Never	Never	Some of the time	Some of the time	Some of the time	Never	Seldom	Never	Never	Often	Often	Never	Never
21	25	Men	highschool	no	Often True	Rarely True	Often True	Often True	Often True	Often True	Almost Always True	Often True	Rarely True	Almost Always True	Almost Never True	Often True	Almost Never True	Rarely True	Rarely True	Almost Always True	Rarely True	No	No	Yes	Yes	No	Yes	No	No	Yes	Yes	No	No			Most of the time	Some of the time	Some of the time	Never	Some of the time	Some of the time	Never	Some of the time	Never	Never	Daily or almost daily	Sometimes	Often	Sometimes
209	22	Women	University	no	Rarely True	Rarely True	Often True	Almost Never True	Rarely True	Almost Never True	Often True	Almost Never True	Often True	Often True	Almost Never True	Almost Always True	Rarely True	Rarely True	Almost Always True	Almost Always True	Rarely True	No	No	Yes	Yes	Yes	Yes	Yes	No	No	Yes	Yes				Most of the time	Seldom	Never	Seldom	Never	Most of the time	Seldom	Never	Rarely	Rarely	Often	Rarely	Rarely	Often
208	18	Women	postgraduate	no	Rarely True	Rarely True	Rarely True	Rarely True	Rarely True	Rarely True	Rarely True	Rarely True	Almost Always True	Rarely True	Rarely True	Rarely True	Rarely True	Rarely True	Rarely True	Rarely True	Rarely True	No	No	No	No	No	No	No	Yes	No	No	No				Seldom	Seldom	Seldom	Some of the time	Some of the time	Seldom	Seldom	Seldom	Rarely	Rarely	Rarely		Rarely	Rarely
207	20	Women	highschool	no	Often True	Rarely True	Rarely True	Often True	Rarely True	Almost Never True	Often True	Often True	Almost Always True	Rarely True	Almost Never True	Rarely True	Almost Never True	Almost Never True	Almost Never True	Almost Always True	Often True	No	No	No	No	No	No	No	Yes	No	No	Yes	Yes			Seldom	Seldom	Never	Most of the time	Some of the time	Some of the time	Some of the time	Most of the time	Sometimes	Sometimes	Daily or almost daily	Sometimes	Often	Rarely
206	19	Women	postgraduate	no	Rarely True	Almost Always True	Often True	Almost Never True	Almost Always True	Almost Always True	Almost Always True	Almost Always True	Almost Never True	Almost Always True	Almost Never True	Often True	Almost Never True	Almost Always True	Often True	Often True	Often True	No	No	No	No	No	No	No	Yes	Yes	No	No	No			Never	Some of the time	Never	Most of the time	Most of the time	Most of the time	Never	Most of the time	Rarely	Never	Daily or almost daily	Often	Often	Often
205	37	Women	University	no	Often True	Often True	Often True	Almost Never True	Often True	Almost Always True	Almost Always True	Rarely True	Often True	Often True	Rarely True	Often True	Rarely True	Almost Always True	Often True	Almost Always True	Rarely True	No	No	Yes	Yes	No	No	Yes	No	Yes	Yes	Yes	No	Yes	No	Most of the time	Seldom	Never	Some of the time	Seldom	Most of the time	Never	Most of the time	Often	Occasionally	Daily or almost daily	Often	Daily or almost daily	Often
204	27	Women	secondary	no	Rarely True	Rarely True	Often True	Rarely True	Rarely True	Rarely True	Often True	Often True	Rarely True	Rarely True	Almost Never True	Rarely True	Almost Never True	Rarely True	Rarely True	Rarely True	Rarely True	No	No	No	No	No	No	No	Yes	No	No	Yes			Yes	Most of the time	Some of the time	Seldom	Most of the time	Most of the time	Most of the time	Seldom	Most of the time	Rarely	Occasionally	Often	Often	Often	Sometimes
203	22	Women	highschool	no	Often True	Often True	Rarely True	Often True	Often True	Often True	Often True	Often True	Often True	Almost Always True	Almost Never True	Often True	Almost Never True	Often True	Often True	Often True	Rarely True	No	No	No	Yes	Yes	Yes	Yes	No	No	No	Yes			Yes	Seldom	Never	Never	Some of the time	Never	Never	Never	Some of the time	Occasionally	Often	Often	Occasionally	Often	Often
202	33	Women	University	no	Rarely True	Almost Always True	Almost Never True	Almost Always True	Rarely True	Rarely True	Almost Always True	Rarely True	Almost Always True	Often True	Almost Never True	Almost Always True	Often True	Often True	Rarely True	Often True	Almost Always True	No	No	Yes	Yes	No	No	No	No	No	Yes	No	No			Never	Never	Never	Some of the time	Some of the time	Some of the time	Seldom	Seldom	Rarely	Rarely	Daily or almost daily	Often	Often	Rarely
201	25	Women	highschool	no	Rarely True	Often True	Rarely True	Often True	Rarely True	Rarely True	Almost Always True	Often True	Often True	Rarely True	Almost Never True	Often True	Rarely True	Rarely True	Rarely True	Often True	Often True	No	No	No	No	No	No	No	Yes	No	No	No	No	No	No	Never	Seldom	Seldom	Most of the time	Some of the time	Some of the time	Some of the time	Most of the time	Rarely	Never	Daily or almost daily	Often	Daily or almost daily	Daily or almost daily
200	26	Women	highschool	no	Rarely True	Rarely True	Rarely True	Rarely True	Almost Never True	Rarely True	Often True	Rarely True	Almost Always True	Almost Never True	Almost Never True	Rarely True	Almost Never True	Almost Never True	Almost Never True	Rarely True	Rarely True	No	No	No	No	No	Yes	No	No	No	Yes	Yes	Yes	Yes		Seldom	Never	Never	Some of the time	Seldom	Some of the time	Some of the time	Some of the time	Often	Sometimes	Daily or almost daily	Daily or almost daily	Sometimes	Often
20	20	Men	highschool	no	Rarely True	Rarely True	Rarely True	Almost Never True	Rarely True	Rarely True	Rarely True	Rarely True	Almost Always True	Rarely True	Almost Never True	Rarely True	Almost Never True	Rarely True	Rarely True	Rarely True	Almost Never True	No	No	Yes	Yes	Yes	Yes	Yes	No	Yes	Yes	No		Yes		Some of the time	Most of the time	Seldom	Most of the time	Some of the time	Some of the time	Some of the time	Seldom	Often	Often	Often	Often	Often	Often
199	28	Women	University	no	Often True	Rarely True	Rarely True	Almost Never True	Almost Never True	Almost Never True	Almost Always True	Almost Never True	Almost Never True	Rarely True	Almost Never True	Almost Always True	Almost Never True	Often True	Often True	Often True	Rarely True	No	No	Yes	Yes	Yes	No	Yes	No	No	Yes	Yes	No	Yes	No	Seldom	Seldom	Seldom	Some of the time	Some of the time	Some of the time	Never	Some of the time	Occasionally	Occasionally	Never	Often	Often	Rarely
198	20	Women	highschool	no	Often True	Often True	Rarely True	Rarely True	Rarely True	Almost Never True	Almost Never True	Almost Never True	Rarely True	Often True	Almost Never True	Rarely True	Almost Never True	Almost Never True	Rarely True	Almost Never True	Almost Never True	No	No	Yes	Yes	No	Yes	Yes	No	Yes	Yes	Yes	No	No		Never	Seldom	Never	Most of the time	Most of the time	Most of the time	Most of the time	Most of the time	Often	Often	Often	Sometimes	Often	Sometimes
197	24	Women	highschool	no	Rarely True	Rarely True	Almost Never True	Almost Always True	Often True	Rarely True	Often True	Rarely True	Rarely True	Almost Always True	Almost Never True	Almost Always True	Almost Always True	Rarely True	Rarely True	Almost Always True	Almost Always True	No	No	Yes	Yes	No	No	Yes	No	No	Yes	Yes	No	No	No	Never	Never	Never	Most of the time		Most of the time	Most of the time	Most of the time	Occasionally	Never	Often	Often	Sometimes	Never
196	34	Women	University	no	Rarely True	Almost Always True	Rarely True	Almost Always True	Almost Never True	Almost Never True	Almost Never True	Almost Never True	Almost Always True	Almost Always True	Almost Never True	Rarely True	Rarely True	Often True	Almost Never True	Often True	Often True	No	No	No	No	No	Yes	No	No	Yes	No	No	No	No	No	Never	Some of the time	Never	Never	Never	Never	Some of the time	Most of the time	Sometimes	Often	Daily or almost daily	Sometimes	Never	Rarely
195	20	Women	highschool	no	Rarely True	Often True	Rarely True	Almost Never True	Almost Never True	Almost Never True	Almost Always True	Almost Never True	Often True	Often True	Almost Never True	Almost Always True	Almost Always True	Almost Always True	Often True	Rarely True	Rarely True	No	No	Yes	Yes	No	No	Yes	No	No	Yes	Yes				Never	Never	Never	Most of the time	Most of the time	Most of the time	Never	Most of the time	Rarely	Rarely	Daily or almost daily	Daily or almost daily	Never	Sometimes
194	24	Women	postgraduate	no	Rarely True	Almost Never True	Rarely True	Rarely True	Often True	Rarely True	Almost Always True	Often True	Rarely True	Rarely True	Almost Never True	Almost Always True	Rarely True	Often True	Often True	Almost Always True	Almost Always True	No	No	Yes	Yes	Yes	Yes	Yes	No	No	Yes	Yes				Seldom	Never	Never	Most of the time	Most of the time	Seldom	Never	Most of the time	Occasionally	Occasionally	Daily or almost daily	Often	Daily or almost daily	Often
193	21	Women	highschool	no	Rarely True	Often True	Often True	Often True	Rarely True	Almost Always True	Often True	Often True	Rarely True	Often True	Almost Never True	Often True	Often True	Often True	Often True	Often True	Often True	No	No	Yes	Yes	Yes	Yes	Yes	No	No	Yes	No	No			Most of the time	Some of the time	Never	Some of the time	Some of the time	Some of the time	Seldom	Most of the time	Sometimes	Sometimes	Often	Daily or almost daily	Daily or almost daily	Daily or almost daily
192	19	Women	postgraduate	no	Often True	Often True	Rarely True	Almost Never True	Often True	Rarely True	Often True	Rarely True	Almost Always True	Often True	Almost Never True	Often True	Almost Always True	Often True	Almost Always True	Almost Always True	Often True	No	No	Yes	Yes	No	No	Yes	No	Yes	Yes	Yes	No	No		Seldom	Some of the time	Never	Some of the time	Most of the time	Most of the time	Never	Never	Never	Never	Daily or almost daily	Often	Daily or almost daily	Never
191	24	Women	University	no	Rarely True	Almost Always True	Almost Always True	Rarely True	Almost Never True	Rarely True	Almost Always True	Rarely True	Often True	Rarely True	Almost Never True	Rarely True	Rarely True	Rarely True	Often True	Almost Always True	Almost Always True	No	No	Yes	Yes	No	Yes	No	No	No	Yes	No	No	Yes		Most of the time	Some of the time		Some of the time		Some of the time			Rarely	Never	Never	Never	Daily or almost daily	Daily or almost daily
190	51	Men	University	no	Rarely True	Rarely True	Rarely True	Rarely True	Often True	Almost Never True	Almost Always True	Almost Always True	Almost Always True	Often True	Almost Never True	Often True	Almost Never True	Rarely True	Rarely True	Often True	Almost Never True	No	No	No	Yes	Yes	No	No	No	No	Yes	No	Yes	No		Never	Some of the time	Never	Most of the time	Seldom	Some of the time	Most of the time	Some of the time	Never	Occasionally	Daily or almost daily	Occasionally	Daily or almost daily	Daily or almost daily
19	46	Women	University	no	Often True	Rarely True	Almost Always True	Rarely True	Rarely True	Often True	Almost Always True	Often True	Almost Always True	Rarely True	Almost Never True	Often True	Rarely True	Often True	Almost Always True	Almost Always True	Often True	No	No	Yes	Yes	Yes	Yes	Yes	No	Yes	Yes	Yes	Yes	No		Never	Some of the time	Never	Most of the time	Some of the time	Most of the time	Never	Most of the time	Occasionally	Rarely	Daily or almost daily	Sometimes	Daily or almost daily	Often
189	23	Women	highschool	no	Rarely True	Often True	Often True	Almost Never True	Often True	Often True	Almost Always True	Often True	Often True	Almost Always True	Almost Never True	Often True	Almost Never True	Rarely True	Rarely True	Almost Always True	Rarely True	No	No	Yes	Yes	No	No	No	No	No	Yes	No	No	No		Never	Seldom	Never	Some of the time	Seldom	Most of the time	Never	Seldom	Rarely	Rarely	Daily or almost daily	Sometimes	Often	Often
188	22	Women	University	no	Rarely True	Almost Always True	Often True	Almost Always True	Rarely True	Often True	Often True	Often True	Almost Always True	Often True	Almost Never True	Often True	Almost Always True	Almost Always True	Often True	Almost Always True	Almost Always True	No	No	Yes	Yes	No	No	Yes	No	No	Yes	Yes				Never	Never	Never	Some of the time	Most of the time	Most of the time	Some of the time	Seldom	Rarely	Never	Daily or almost daily	Often	Often	Sometimes
187	23	Women	highschool	no	Almost Never True	Often True	Often True	Often True	Almost Always True	Almost Always True	Often True	Rarely True	Almost Always True	Almost Always True	Almost Never True	Almost Always True	Often True	Almost Always True	Almost Always True	Almost Always True	Often True	No	No	Yes	Yes	No	No	Yes	No	Yes	Yes	Yes	No	No		Never	Some of the time	Seldom	Most of the time	Most of the time	Most of the time	Most of the time	Most of the time	Rarely	Rarely	Daily or almost daily	Occasionally	Daily or almost daily	Occasionally
186	52	Men	University	no	Rarely True	Rarely True	Rarely True	Almost Never True	Often True	Rarely True	Rarely True	Often True	Often True	Often True	Almost Never True	Often True	Rarely True	Often True	Often True	Often True	Rarely True	No	No	Yes	Yes	Yes	No	Yes	No	Yes	Yes	Yes				Seldom	Seldom	Never	Some of the time	Seldom	Most of the time	Some of the time	Some of the time	Occasionally	Rarely	Daily or almost daily	Sometimes	Often	Never
185	20	Women	highschool	no	Rarely True	Rarely True	Often True	Often True	Almost Always True	Almost Always True	Almost Always True	Almost Always True	Almost Always True	Almost Always True	Almost Never True	Rarely True	Rarely True	Often True	Rarely True	Rarely True	Rarely True	No	No	No	No	No	No	No	No	No	No	No	No			Never	Never	Never	Some of the time	Some of the time	Some of the time	Never	Some of the time	Rarely	Never	Often	Daily or almost daily	Occasionally	Rarely
184	23	Women	highschool	no	Rarely True	Often True	Rarely True	Rarely True	Often True	Rarely True	Almost Always True	Often True	Often True	Almost Always True	Almost Never True	Often True	Rarely True	Often True	Rarely True	Often True	Often True	No	No	No	No	No	Yes	Yes	No	Yes	Yes	No	No	No		Never	Most of the time	Never	Never	Never	Never	Never	Never	Occasionally	Never	Daily or almost daily	Sometimes	Rarely	Sometimes
183	24	Women	highschool	no	Almost Never True	Rarely True	Often True	Often True	Almost Always True	Almost Always True	Almost Always True	Almost Always True	Almost Always True	Almost Always True	Almost Never True	Often True	Rarely True	Rarely True	Rarely True	Almost Always True	Rarely True	No	No	Yes	Yes	No	No	No	No	No	Yes	Yes				Seldom	Seldom	Never	Most of the time	Never	Some of the time	Some of the time	Some of the time	Rarely	Never	Daily or almost daily	Often	Often	Sometimes
182	19	Women	postgraduate	no	Almost Always True	Rarely True	Rarely True	Rarely True	Rarely True	Rarely True	Rarely True	Rarely True	Rarely True	Rarely True	Almost Never True	Often True	Rarely True	Often True	Often True	Often True	Rarely True	No	No	Yes	Yes	Yes	Yes	Yes	No	No	Yes	Yes				Seldom	Some of the time	Never	Most of the time	Seldom	Most of the time	Most of the time	Most of the time	Often	Occasionally	Daily or almost daily	Rarely	Daily or almost daily	Daily or almost daily
181	25	Women	highschool	no	Almost Always True	Almost Never True	Almost Never True	Almost Never True	Almost Always True	Almost Always True	Almost Always True	Almost Always True	Often True	Almost Always True	Almost Never True	Rarely True	Almost Never True	Almost Never True	Almost Never True	Almost Always True	Almost Never True	No	No	No	No	No	No	No	No	No	No	No				Never	Never	Seldom	Most of the time	Never	Most of the time	Seldom	Some of the time	Often	Often	Daily or almost daily	Rarely	Daily or almost daily	Daily or almost daily
180	22	Women	highschool	no	Often True	Almost Always True	Often True	Often True	Often True	Almost Always True	Often True	Almost Always True	Often True	Almost Always True	Almost Never True	Often True	Rarely True	Almost Always True	Almost Always True	Almost Always True	Often True	No	No	Yes	Yes	No	Yes	No	No	No	No	Yes	No	Yes		Most of the time	Some of the time	Never	Some of the time	Never	Seldom	Seldom	Most of the time	Never	Never	Daily or almost daily	Sometimes	Often	Daily or almost daily
18	34	Women	University	no	Often True	Often True	Often True	Often True	Often True	Often True	Often True	Often True	Almost Always True	Often True	Almost Never True	Often True	Rarely True	Often True	Often True	Almost Always True	Rarely True	No	No	Yes	Yes	No	Yes	Yes	No	Yes	Yes	No	Yes	Yes		Some of the time	Some of the time	Some of the time	Some of the time	Some of the time	Most of the time	Seldom	Some of the time	Occasionally	Occasionally	Daily or almost daily	Sometimes	Daily or almost daily	Sometimes
179	23	Women	University	no	Often True	Rarely True	Often True	Almost Always True	Rarely True	Often True	Almost Always True	Rarely True	Almost Always True	Often True	Almost Never True	Often True	Rarely True	Almost Always True	Almost Always True	Often True	Almost Always True	No	No	Yes	Yes	No	Yes	No	No	No	Yes	Yes		Yes		Some of the time	Seldom	Seldom	Most of the time	Some of the time	Some of the time	Most of the time	Most of the time	Rarely	Never	Daily or almost daily	Sometimes	Daily or almost daily	Rarely
178	20	Women	postgraduate	no	Often True	Often True	Often True	Almost Always True	Often True	Often True	Almost Always True	Almost Always True	Rarely True	Almost Always True	Almost Never True	Almost Always True	Often True	Often True	Often True	Often True	Rarely True	No	No	Yes	Yes	Yes	No	No	No	Yes	Yes	Yes	No	No	Yes	Never	Some of the time	Seldom	Most of the time	Seldom	Seldom	Some of the time	Some of the time	Rarely	Rarely	Daily or almost daily	Sometimes	Daily or almost daily	Sometimes
177	29	Women	University	no	Often True	Often True	Often True	Often True	Often True	Often True	Almost Always True	Often True	Often True	Often True	Rarely True	Often True	Often True	Often True	Often True	Often True	Often True	No	No	Yes	Yes	Yes	Yes	Yes	No	Yes	Yes	No	No	Yes		Most of the time	Some of the time	Seldom	Seldom	Some of the time	Most of the time	Seldom	Seldom	Occasionally	Never	Daily or almost daily	Often	Daily or almost daily	Often
176	27	Women	secondary	no	Rarely True	Often True	Often True	Often True	Almost Always True	Almost Never True	Almost Always True	Almost Never True	Almost Always True	Almost Always True	Almost Never True	Rarely True	Almost Never True	Almost Always True	Almost Always True	Almost Always True	Almost Always True	No	No	No	No	No	No	No	No	No	No	Yes				Never	Never	Never	Most of the time	Never	Seldom	Some of the time	Most of the time	Occasionally	Occasionally	Daily or almost daily	Daily or almost daily	Daily or almost daily	Sometimes
175	20	Women	highschool	no	Often True	Often True	Almost Always True	Almost Always True	Almost Always True	Almost Never True	Almost Always True	Almost Always True	Rarely True	Almost Always True	Almost Never True	Often True	Almost Never True	Rarely True	Rarely True	Rarely True	Rarely True	No	No	No	No	No	No	No	No	No	Yes	Yes	No	No	No	Most of the time	Never	Never	Most of the time	Some of the time	Most of the time	Seldom	Some of the time	Occasionally	Occasionally	Daily or almost daily	Often	Sometimes	Sometimes
174	19	Women	postgraduate	no	Almost Always True	Often True	Often True	Rarely True	Often True	Often True	Almost Always True	Almost Always True	Rarely True	Often True	Rarely True	Almost Always True	Almost Never True	Almost Always True	Almost Always True	Almost Always True	Almost Never True	No	No	Yes	Yes	Yes	Yes	Yes	No	No	Yes	Yes	No	No	No	Never	Seldom	Never	Most of the time	Most of the time	Seldom	Never	Seldom	Never	Never	Daily or almost daily	Rarely	Often	Sometimes
173	20	Women	highschool	no	Rarely True	Rarely True	Rarely True	Often True	Rarely True	Rarely True	Almost Always True	Rarely True	Often True	Often True	Almost Never True	Often True	Almost Never True	Almost Always True	Almost Always True	Almost Always True	Often True	No	No	Yes	Yes	Yes	Yes	Yes	No	No	Yes	Yes	Yes			Never	Never	Never	Some of the time	Seldom	Seldom	Seldom	Seldom	Rarely	Rarely	Occasionally	Occasionally	Occasionally	Occasionally
172	31	Women	University	no	Rarely True	Almost Never True	Rarely True	Often True	Almost Always True	Rarely True	Often True	Rarely True	Rarely True	Almost Always True	Rarely True	Often True	Almost Never True	Often True	Often True	Often True	Rarely True	No	No	Yes	Yes	Yes	Yes	Yes	No	Yes	Yes	Yes	Yes			Seldom	Some of the time	Some of the time	Most of the time	Most of the time	Seldom	Never	Most of the time	Never	Never	Daily or almost daily	Daily or almost daily	Often	Sometimes
171	26	Women	highschool	no	Often True	Almost Always True	Almost Never True	Often True	Rarely True	Often True	Often True	Rarely True	Often True	Almost Never True	Almost Never True	Rarely True	Almost Never True	Almost Never True	Rarely True	Often True	Often True	No	No	Yes	Yes	No	No	No	No	Yes	Yes	No	No		Yes							Most of the time	Most of the time	Never	Rarely	Often	Often	Daily or almost daily	Rarely
170	65	Men	postgraduate	no	Rarely True	Often True	Almost Never True	Rarely True	Often True	Rarely True	Almost Always True	Often True	Often True	Often True	Almost Never True	Often True	Almost Never True	Rarely True	Often True	Rarely True	Rarely True	No	No	Yes	Yes	Yes	Yes	No	No	Yes	No	Yes	Yes	No	No	Never	Some of the time	Seldom	Some of the time	Seldom	Some of the time	Some of the time	Some of the time	Rarely	Often	Daily or almost daily	Often	Daily or almost daily	Occasionally
17	52	Women	University	no	Rarely True	Almost Always True	Often True	Almost Never True	Rarely True	Almost Never True	Almost Always True	Rarely True	Rarely True	Often True	Almost Never True	Almost Always True	Almost Never True	Rarely True	Often True	Almost Always True	Rarely True	No	No	Yes	No	Yes	Yes	Yes	No	Yes	No	Yes	No	Yes	No	Most of the time	Some of the time	Never	Most of the time	Seldom	Seldom	Seldom	Some of the time	Often	Never	Daily or almost daily	Daily or almost daily	Daily or almost daily	Sometimes
169	23	Women	highschool	no	Often True	Rarely True	Rarely True	Rarely True	Rarely True	Often True	Almost Always True	Rarely True	Almost Always True	Often True	Almost Never True	Often True	Rarely True	Rarely True	Often True	Often True	Rarely True	No	No	Yes	Yes	No	No	Yes	No	Yes	Yes	Yes				Seldom	Some of the time	Some of the time	Most of the time	Most of the time	Most of the time	Most of the time	Most of the time	Sometimes	Sometimes	Sometimes	Often	Sometimes	Sometimes
168	22	Women	postgraduate	no	Often True	Rarely True	Rarely True	Rarely True	Rarely True	Rarely True	Rarely True	Rarely True	Rarely True	Rarely True	Rarely True	Rarely True	Rarely True	Rarely True	Rarely True	Rarely True	Rarely True	No	No	Yes	Yes	Yes	Yes	Yes	No	Yes	No	No	No			Never	Seldom	Seldom	Seldom	Seldom	Seldom	Seldom	Seldom	Rarely	Rarely	Rarely	Rarely	Rarely	Rarely
167	21	Women	highschool	no	Often True	Rarely True	Almost Never True	Almost Never True	Almost Never True	Almost Never True	Often True	Almost Never True	Almost Always True	Often True	Rarely True	Rarely True	Almost Never True	Almost Never True	Rarely True	Often True	Often True	No	No	Yes	Yes	No	No	No	No	No	No	Yes	Yes			Never	Never	Never	Some of the time	Some of the time	Some of the time	Some of the time	Some of the time	Often	Sometimes	Often	Daily or almost daily	Daily or almost daily	Often
166	20	Women	University	no	Almost Never True	Rarely True	Almost Never True	Rarely True	Almost Never True	Almost Never True	Rarely True	Rarely True	Almost Always True	Almost Never True	Rarely True	Almost Always True	Often True	Often True	Often True	Often True	Almost Never True	No	No	Yes	Yes	Yes	Yes	Yes	No	Yes	Yes	Yes	No	No		Never	Some of the time	Never	Most of the time	Never	Most of the time	Some of the time	Some of the time	Rarely	Often	Daily or almost daily	Sometimes	Often	Sometimes
165	21	Women	postgraduate	no	Often True	Rarely True	Rarely True	Almost Never True	Rarely True	Almost Always True	Almost Always True	Almost Always True	Almost Never True	Often True	Almost Never True	Almost Never True	Rarely True	Rarely True	Almost Always True	Almost Always True	Almost Always True	No	No	Yes	Yes	Yes	Yes	Yes	No	Yes	Yes	Yes				Never	Seldom	Never	Most of the time	Most of the time	Most of the time	Never	Some of the time	Rarely	Never	Often	Often	Daily or almost daily	Sometimes
164	21	Women	highschool	no	Often True	Almost Never True	Rarely True	Almost Never True	Rarely True	Almost Never True	Almost Never True	Rarely True	Often True	Often True	Almost Never True	Almost Never True	Rarely True	Rarely True	Rarely True	Often True	Rarely True	No	No	Yes	No	No	Yes	No	No	Yes	No	No	No			Never	Never	Never	Some of the time	Some of the time	Some of the time	Some of the time	Some of the time	Occasionally	Rarely	Occasionally	Sometimes	Rarely	Rarely
163	34	Women	University	no	Almost Never True	Often True	Rarely True	Rarely True	Almost Always True	Rarely True	Often True	Often True	Often True	Almost Always True	Almost Never True	Often True	Almost Never True	Almost Always True	Almost Always True	Almost Always True	Rarely True	No	No	Yes	Yes	Yes	Yes	Yes	No	Yes	No	No	No	Yes		Some of the time	Some of the time	Never	Seldom	Never	Never	Seldom	Some of the time	Often	Never	Daily or almost daily	Sometimes	Daily or almost daily	Occasionally
162	20	Women	highschool	no	Rarely True	Rarely True	Almost Never True	Almost Never True	Almost Never True	Rarely True	Often True	Rarely True	Almost Always True	Rarely True	Almost Never True	Almost Never True	Almost Never True	Almost Never True	Rarely True	Often True	Almost Never True	No	No	Yes	Yes	Yes	Yes	Yes	No	Yes	Yes	Yes					Most of the time		Seldom	Seldom	Seldom	Never	Seldom	Occasionally	Occasionally	Daily or almost daily	Often	Daily or almost daily	Often
161	26	Women	highschool	no	Almost Never True	Almost Always True	Almost Never True	Often True	Often True	Often True	Almost Always True	Often True	Almost Always True	Rarely True	Almost Never True	Often True	Often True	Often True	Rarely True	Often True	Rarely True	No	No	Yes	Yes	No	Yes	Yes	No	No	No	No	No	Yes	No	Some of the time	Most of the time		Some of the time		Some of the time	Never	Some of the time	Rarely	Never	Occasionally	Never	Occasionally	Rarely
160	36	Women	postgraduate	no	Often True	Often True	Rarely True	Often True	Often True	Almost Always True	Almost Always True	Often True	Often True	Rarely True	Almost Never True	Rarely True	Rarely True	Rarely True	Rarely True	Often True	Rarely True	No	No	No	No	No	Yes	No	No	No	No	Yes				Never	Seldom	Never	Most of the time	Never	Some of the time	Most of the time	Most of the time	Rarely	Never	Often	Sometimes	Often	Sometimes
16	36	Women	University	no	Rarely True	Often True	Often True	Often True	Often True	Often True	Often True	Often True	Often True	Often True	Almost Never True	Rarely True	Often True	Almost Never True	Often True	Rarely True	Rarely True	No	No	Yes	Yes	Yes	Yes	No	No	Yes	No	No	No	Yes		Some of the time	Never	Never	Never	Never	Never	Never	Never	Never	Never	Never	Never	Never	Never
159	31	Women	University	no	Often True	Often True	Often True	Often True	Rarely True	Rarely True	Almost Always True	Rarely True	Rarely True	Often True	Rarely True	Often True	Often True	Often True	Almost Always True	Almost Always True	Often True	No	No	No	No	Yes	No	No	No	No	No	Yes				Never	Seldom	Never	Most of the time	Seldom	Seldom	Most of the time	Most of the time	Never	Never	Daily or almost daily	Occasionally	Daily or almost daily	Rarely
158	22	Women	highschool	no	Rarely True	Often True	Often True	Often True	Rarely True	Rarely True	Almost Always True	Rarely True	Often True	Almost Always True	Almost Never True	Almost Always True	Almost Always True	Almost Always True	Almost Always True	Almost Always True	Rarely True	No	No	Yes	Yes	No	No	Yes	No	Yes	No	No	No	Yes		Some of the time	Seldom	Most of the time	Never	Seldom	Seldom	Never	Never	Rarely	Never	Daily or almost daily	Often	Often	Daily or almost daily
157	37	Women	University	no	Rarely True	Often True	Almost Always True	Almost Always True	Often True	Rarely True	Almost Always True	Often True	Almost Always True	Almost Never True	Almost Never True	Often True	Rarely True	Rarely True	Rarely True	Almost Always True	Rarely True	No	No	Yes	Yes	No	No	Yes	No	No	Yes	No	No			Seldom	Never	Never	Some of the time	Most of the time	Most of the time	Seldom	Some of the time	Often	Sometimes	Daily or almost daily	Sometimes	Daily or almost daily	Daily or almost daily
156	26	Women	highschool	no	Often True	Rarely True	Rarely True	Almost Always True	Often True	Rarely True	Almost Always True	Rarely True	Almost Always True	Often True	Almost Never True	Rarely True	Almost Never True	Often True	Often True	Almost Always True	Rarely True	No	No	Yes	No	No	Yes	No	No	Yes	Yes	No	No	Yes	Yes	Seldom	Seldom	Never	Never	Never	Some of the time	Some of the time	Never	Never	Never	Daily or almost daily	Occasionally	Daily or almost daily	Rarely
155	23	Women	postgraduate	no	Often True	Rarely True	Rarely True	Almost Never True	Often True	Almost Never True	Rarely True	Rarely True	Almost Never True	Often True	Almost Never True	Almost Always True	Often True	Almost Always True	Often True	Almost Always True	Rarely True	No	No	Yes	Yes	No	Yes	Yes	No	No	No	Yes				Seldom	Seldom	Never	Most of the time	Seldom	Seldom	Never	Some of the time	Rarely	Occasionally	Often	Often	Often	Occasionally
154	40	Women	University	no	Often True	Rarely True	Almost Always True	Almost Always True	Often True	Almost Never True	Almost Always True	Rarely True	Almost Always True	Often True	Almost Never True	Often True	Often True	Almost Never True	Almost Never True	Almost Always True	Almost Always True	No	No	No	No	No	Yes	No	No	No	No	No	No	Yes		Most of the time	Never	Never	Most of the time	Never	Never	Seldom	Most of the time	Rarely	Rarely	Daily or almost daily	Occasionally	Daily or almost daily	Daily or almost daily
153	29	Women	University	no	Often True	Almost Always True	Often True	Often True	Often True	Often True	Almost Always True	Often True	Rarely True	Often True	Almost Never True	Often True	Almost Always True	Often True	Rarely True	Almost Always True	Often True	No	No	No	No	No	Yes	No	No	No	Yes	Yes	No	No		Never	Seldom	Seldom	Most of the time	Never	Most of the time	Some of the time	Most of the time	Sometimes	Never	Daily or almost daily	Never	Daily or almost daily	Daily or almost daily
152	23	Men	highschool	no	Often True	Often True	Rarely True	Often True	Often True	Rarely True	Often True	Rarely True	Rarely True	Almost Always True	Almost Never True	Rarely True	Rarely True	Often True	Often True	Almost Always True	Rarely True	No	No	No	No	No	No	Yes	No	Yes	Yes	Yes		Yes		Seldom	Some of the time	Some of the time	Some of the time	Seldom	Some of the time	Some of the time	Some of the time	Occasionally	Never	Daily or almost daily	Often	Sometimes	Sometimes
151	38	Men	University	no	Almost Always True	Almost Always True	Rarely True	Almost Always True	Often True	Rarely True	Often True	Rarely True	Almost Always True	Almost Always True	Almost Never True	Often True	Almost Always True	Rarely True	Often True	Almost Always True	Almost Always True	No	No	Yes	Yes	No	No	No	No	No	Yes	Yes				Never	Some of the time	Never	Most of the time	Most of the time	Most of the time	Never	Most of the time	Occasionally	Sometimes	Daily or almost daily	Often	Occasionally	Sometimes
150	28	Women	University	no	Often True	Almost Always True	Often True	Almost Always True	Rarely True	Almost Always True	Almost Always True	Often True	Almost Always True	Rarely True	Rarely True	Often True	Almost Never True	Rarely True	Almost Always True	Almost Always True	Rarely True	No	No	Yes	No	No	Yes	No	No	Yes	Yes	No	No	Yes		Most of the time	Some of the time	Seldom	Never	Never	Some of the time	Never	Never	Rarely	Never	Sometimes	Daily or almost daily	Often	Sometimes
15	26	Women	highschool	no	Rarely True	Often True	Almost Never True	Often True	Almost Always True	Almost Never True	Almost Always True	Rarely True	Almost Never True	Rarely True	Almost Never True	Almost Always True	Almost Never True	Almost Always True	Almost Always True	Often True	Often True	No	No	No	No	No	No	No	No	No	No	No	No			Never	Most of the time	Never	Most of the time	Seldom	Most of the time	Seldom	Most of the time
149	32	Women	University	no	Often True	Rarely True	Almost Never True	Rarely True	Often True	Rarely True	Often True	Often True	Almost Always True	Often True	Almost Never True	Rarely True	Often True	Often True	Often True	Often True	Often True	No	No	Yes	Yes	No	Yes	Yes	No	Yes	Yes	Yes	No	Yes		Most of the time	Seldom	Seldom	Most of the time	Some of the time	Most of the time	Seldom	Some of the time	Rarely	Rarely	Daily or almost daily	Sometimes	Daily or almost daily	Occasionally
148	22	Women	highschool	no	Rarely True	Often True	Rarely True	Almost Always True	Rarely True	Rarely True	Almost Always True	Almost Always True	Rarely True	Rarely True	Almost Never True	Often True	Almost Always True	Rarely True	Rarely True	Almost Always True	Almost Always True	No	No	No	No	No	No	No	No	No	Yes	No	No	No	No	Seldom	Never	Seldom	Seldom	Seldom	Most of the time	Never	Seldom	Occasionally	Never	Daily or almost daily	Often	Daily or almost daily	Often
147	23	Women	highschool	no	Often True	Rarely True	Rarely True	Often True	Rarely True	Rarely True	Almost Always True	Often True	Rarely True	Rarely True	Almost Never True	Rarely True	Rarely True	Often True	Often True	Often True	Often True	No	No	Yes	Yes	No	Yes	No	No	Yes	Yes	Yes				Never	Never	Seldom	Some of the time	Some of the time	Most of the time	Never	Some of the time	Sometimes	Never	Daily or almost daily	Rarely	Often	Often
146	32	Women	University	no	Rarely True	Rarely True	Rarely True	Often True	Rarely True	Rarely True	Often True	Often True	Almost Always True	Often True	Almost Never True	Almost Always True	Almost Never True	Almost Never True	Often True	Often True	Rarely True	No	No	Yes	Yes	No	No	No	No	Yes	Yes	Yes	No	No	No	Never	Some of the time	Never	Most of the time	Most of the time	Most of the time	Some of the time	Most of the time	Daily or almost daily	Sometimes	Daily or almost daily	Often	Daily or almost daily	Daily or almost daily
145	36	Women	University	no	Rarely True	Almost Never True	Almost Never True	Almost Never True	Almost Never True	Almost Never True	Often True	Almost Never True	Often True	Rarely True	Almost Never True	Almost Never True	Almost Never True	Almost Never True	Almost Never True	Almost Always True	Almost Never True	No	No	Yes	Yes	Yes	Yes	Yes	No	No	Yes	Yes	No	No	No	Most of the time	Seldom	Seldom	Some of the time	Never	Never	Seldom	Some of the time	Never	Never	Never	Often	Sometimes	Sometimes
144	28	Women	University	no	Often True	Almost Never True	Often True	Often True	Often True	Often True	Often True	Often True	Rarely True	Almost Never True	Almost Never True	Often True	Often True	Rarely True	Rarely True	Often True	Rarely True	No	No	Yes	Yes	No	Yes	Yes	No	Yes	Yes	No	No	Yes	Yes	Some of the time	Most of the time	Some of the time	Never	Seldom	Some of the time	Seldom	Never	Occasionally	Rarely	Often	Rarely	Daily or almost daily	Often
143	56	Men	University	no	Often True	Often True	Rarely True	Often True	Often True	Rarely True	Often True	Often True	Often True	Almost Always True	Rarely True	Rarely True	Rarely True	Often True	Rarely True	Almost Always True	Often True	No	No	Yes	Yes	Yes	Yes	Yes	No	No	Yes	Yes	Yes	No		Never	Never	Never	Most of the time	Seldom	Most of the time	Seldom	Most of the time	Rarely	Rarely	Rarely	Often	Sometimes	Sometimes
142	30	Women	University	no	Rarely True	Often True	Rarely True	Rarely True	Often True	Almost Never True	Almost Always True	Rarely True	Almost Always True	Rarely True	Almost Never True	Often True	Almost Never True	Often True	Rarely True	Almost Always True	Often True	No	No	Yes	Yes	No	Yes	Yes	No	Yes	Yes	No	Yes	Yes	No	Most of the time	Some of the time	Never	Most of the time	Most of the time	Some of the time	Some of the time	Some of the time	Often	Rarely	Often	Often	Sometimes	Sometimes
141	40	Men	University	no	Rarely True	Often True	Almost Never True	Rarely True	Often True	Rarely True	Often True	Often True	Almost Never True	Often True	Almost Never True	Rarely True	Rarely True	Almost Always True	Rarely True	Almost Always True	Often True	No	No	Yes	Yes	No	No	No	No	No	Yes	Yes	No	No		Never	Never	Never	Some of the time	Never	Seldom	Seldom	Most of the time	Occasionally	Rarely	Daily or almost daily	Never	Often	Sometimes
140	30	Women	University	no	Rarely True	Rarely True	Often True	Almost Never True	Rarely True	Almost Never True	Almost Always True	Rarely True	Rarely True	Almost Never True	Almost Never True	Rarely True	Rarely True	Rarely True	Rarely True	Rarely True	Rarely True	No	No	No	No	No	No	No	Yes	No	Yes	Yes	Yes	No		Never	Never	Never	Most of the time	Some of the time	Seldom	Seldom	Some of the time	Sometimes	Sometimes	Often	Daily or almost daily	Sometimes	Sometimes
14	37	Women	University	no	Almost Always True	Often True	Almost Always True	Rarely True	Often True	Almost Always True	Almost Always True	Often True	Almost Always True	Rarely True	Almost Never True	Almost Always True	Almost Never True	Almost Always True	Almost Always True	Almost Always True	Rarely True	No	No	Yes	Yes	Yes	Yes	Yes	No	Yes	Yes	Yes		Yes		Seldom	Some of the time	Some of the time	Most of the time	Most of the time	Most of the time	Never	Most of the time	Rarely	Rarely	Daily or almost daily	Daily or almost daily	Often	Daily or almost daily
139	44	Men	University	no	Often True	Rarely True	Almost Never True	Rarely True	Rarely True	Rarely True	Almost Never True	Almost Always True	Almost Always True	Almost Always True	Almost Never True	Rarely True	Almost Never True	Rarely True	Often True	Almost Always True	Rarely True	No	No	Yes	Yes	No	Yes	Yes	No	No	Yes	No	No	Yes		Some of the time	Never	Never	Most of the time	Most of the time	Most of the time	Never	Seldom	Occasionally	Occasionally	Sometimes	Occasionally	Sometimes	Sometimes
138	35	Women	University	no	Almost Never True	Rarely True	Rarely True	Rarely True	Often True	Often True	Almost Always True	Often True	Rarely True	Often True	Rarely True	Often True	Rarely True	Often True	Often True	Often True	Rarely True	No	No	Yes	Yes	Yes	No	Yes	No	Yes	Yes	Yes	Yes			Seldom	Some of the time	Seldom	Most of the time	Most of the time	Most of the time	Never	Most of the time	Rarely	Rarely	Daily or almost daily	Occasionally	Often	Never
137	23	Men	highschool	no	Often True	Almost Always True	Often True	Often True	Almost Always True	Often True	Almost Always True	Almost Always True	Rarely True	Almost Always True	Almost Never True	Often True	Often True	Often True	Almost Always True	Almost Always True	Almost Always True	No	No	Yes	Yes	No	Yes	Yes	No	Yes	Yes	No	No	No	Yes	Seldom	Some of the time	Seldom	Seldom	Seldom	Most of the time	Seldom	Most of the time	Sometimes	Occasionally	Daily or almost daily	Often	Often	Sometimes
136	38	Women	University	no	Rarely True	Almost Always True	Often True	Often True	Often True	Almost Always True	Almost Always True	Rarely True	Almost Never True	Almost Always True	Rarely True	Often True	Often True	Often True	Often True	Often True	Often True	No	No	No	No	Yes	Yes	No	No	No	No	Yes	Yes	Yes		Seldom	Some of the time	Never	Most of the time	Most of the time	Most of the time	Some of the time	Most of the time	Rarely	Occasionally	Often	Sometimes	Daily or almost daily	Often
135	34	Men	University	no	Often True	Often True	Often True	Often True	Often True	Often True	Often True	Often True	Rarely True	Often True	Rarely True	Rarely True	Rarely True	Rarely True	Rarely True	Rarely True	Rarely True	No	No	No	No	No	No	No	No	No	No	No	No
134	21	Men	highschool	no	Often True	Almost Never True	Almost Never True	Rarely True	Rarely True	Almost Never True	Rarely True	Almost Never True	Almost Always True	Almost Never True	Almost Never True	Rarely True	Rarely True	Often True	Often True	Almost Always True	Almost Never True	No	No	Yes	Yes	No	Yes	No	No	No	Yes	Yes	No	No		Seldom	Never	Never	Most of the time	Most of the time	Most of the time	Never	Most of the time	Often	Sometimes	Often	Often	Sometimes	Sometimes
133	20	Women	highschool	no	Often True	Often True	Rarely True	Almost Never True	Often True	Rarely True	Almost Always True	Almost Never True	Almost Always True	Often True	Almost Never True	Almost Never True	Almost Never True	Often True	Often True	Almost Always True	Almost Never True	No	No	No	No	Yes	Yes	No	No	No	No	No				Seldom	Never	Never	Seldom	Some of the time	Most of the time	Never	Some of the time	Sometimes	Often	Daily or almost daily	Daily or almost daily	Daily or almost daily	Sometimes
132	28	Women	University	no	Almost Always True	Rarely True	Rarely True	Often True	Almost Never True	Rarely True	Almost Never True	Almost Always True	Almost Never True	Almost Never True	Rarely True	Rarely True	Almost Never True	Rarely True	Rarely True	Almost Always True	Often True	No	No	Yes	Yes	Yes	Yes	Yes	No	No	Yes	Yes	Yes	Yes	Yes	Seldom	Some of the time	Never	Most of the time	Never	Seldom	Some of the time	Some of the time	Occasionally	Occasionally	Daily or almost daily	Often	Often	Occasionally
131	52	Men	University	no	Often True	Rarely True	Rarely True	Rarely True	Rarely True	Rarely True	Often True	Rarely True	Almost Always True	Rarely True	Rarely True	Rarely True	Rarely True	Rarely True	Rarely True	Rarely True	Rarely True	No	No	Yes	Yes	Yes	Yes	Yes	No	Yes	No	No	No			Seldom	Seldom	Seldom	Seldom	Seldom	Seldom	Seldom	Seldom	Rarely	Rarely	Often	Sometimes	Rarely	Rarely
130	37	Women	University	no	Often True	Often True	Often True	Often True	Often True	Often True	Often True	Often True	Often True	Often True	Almost Never True	Rarely True	Rarely True	Rarely True	Almost Never True	Almost Never True	Almost Never True	No	No	Yes	Yes	Yes	Yes	Yes	No	No	No	Yes				Never	Seldom	Never	Most of the time	Seldom	Some of the time	Most of the time	Some of the time	Sometimes	Rarely	Sometimes	Occasionally	Rarely	Rarely
13	54	Women	postgraduate	no	Often True	Rarely True	Often True	Often True	Often True	Often True	Almost Always True	Often True	Almost Always True	Often True	Almost Never True	Often True	Often True	Often True	Rarely True	Almost Always True	Rarely True	No	No	Yes	Yes	No	No	Yes	No	Yes	Yes	Yes		Yes		Most of the time	Some of the time	Seldom	Some of the time	Some of the time	Seldom	Seldom	Some of the time	Rarely	Sometimes	Daily or almost daily	Often	Sometimes	Often
129	26	Women	highschool	no	Rarely True	Almost Always True	Rarely True	Almost Never True	Almost Always True	Often True	Rarely True	Almost Always True	Rarely True	Almost Always True	Almost Never True	Almost Always True	Almost Always True	Almost Always True	Almost Always True	Almost Always True	Often True	No	No	Yes	Yes	Yes	No	Yes	No	No	Yes	Yes	Yes	No	No	Seldom	Seldom	Some of the time	Most of the time	Most of the time	Most of the time	Most of the time	Most of the time	Often	Often	Daily or almost daily	Often	Daily or almost daily	Daily or almost daily
128	37	Women	University	no	Often True	Rarely True	Often True	Almost Never True	Rarely True	Rarely True	Rarely True	Rarely True	Almost Never True	Almost Never True	Almost Never True	Rarely True	Almost Never True	Almost Never True	Often True	Almost Never True	Almost Never True	No	No	Yes	Yes	No	No	No	No	No	Yes	Yes	No	No	No	Never	Never	Never	Most of the time	Most of the time	Seldom	Seldom	Most of the time	Often	Rarely	Sometimes	Daily or almost daily	Occasionally	Sometimes
127	23	Men	highschool	no	Often True	Almost Always True	Often True	Almost Always True	Almost Always True	Almost Always True	Almost Always True	Almost Always True	Rarely True	Almost Always True	Almost Never True	Rarely True	Almost Always True	Almost Always True	Almost Always True	Almost Always True	Almost Always True	No	No	Yes	Yes	Yes	Yes	No	No	No	Yes	Yes				Never	Some of the time	Never	Most of the time	Most of the time	Most of the time	Some of the time	Most of the time	Rarely	Rarely	Sometimes	Sometimes	Sometimes	Sometimes
126	24	Women	highschool	no	Often True	Often True	Almost Never True	Rarely True	Often True	Rarely True	Often True	Rarely True	Almost Always True	Often True	Almost Never True	Often True	Almost Never True	Often True	Rarely True	Often True	Rarely True	No	No	No	No	No	No	No	Yes	No	No	Yes		Yes		Most of the time			Most of the time	Most of the time	Most of the time	Most of the time	Most of the time	Sometimes	Sometimes	Daily or almost daily	Sometimes	Daily or almost daily	Daily or almost daily
125	22	Women	highschool	no	Often True	Almost Never True	Rarely True	Rarely True	Rarely True	Often True	Almost Always True	Often True	Almost Always True	Often True	Almost Never True	Often True	Rarely True	Almost Always True	Often True	Almost Always True	Rarely True	No	No	No	No	Yes	Yes	Yes	No	Yes	Yes	Yes	No	No	No	Never	Most of the time	Some of the time	Some of the time	Some of the time	Some of the time	Never	Some of the time	Never	Never	Daily or almost daily	Daily or almost daily	Daily or almost daily	Often
124	35	Women	postgraduate	no	Almost Always True	Rarely True	Often True	Often True	Almost Always True	Often True	Often True	Often True	Often True	Almost Always True	Almost Never True	Almost Always True	Rarely True	Rarely True	Rarely True	Often True	Rarely True	No	No	Yes	Yes	No	Yes	Yes	No	Yes	Yes	No	No	No		Never	Some of the time	Seldom	Some of the time	Seldom	Most of the time	Seldom	Seldom	Sometimes	Occasionally	Daily or almost daily	Often	Often	Sometimes
123	19	Women	postgraduate	no	Rarely True	Often True	Often True	Often True	Often True	Rarely True	Often True	Almost Always True	Often True	Almost Always True	Almost Never True	Almost Never True	Almost Never True	Almost Never True	Rarely True	Almost Always True	Often True	No	No	Yes	Yes	Yes	No	No	No	Yes	Yes	Yes	Yes	No		Never	Seldom	Never	Most of the time	Most of the time	Most of the time	Most of the time	Most of the time	Sometimes	Sometimes	Daily or almost daily	Sometimes	Often	Occasionally
122	22	Women	highschool	no	Almost Always True	Almost Never True	Often True	Rarely True	Almost Never True	Rarely True	Often True	Almost Never True	Often True	Rarely True	Almost Never True	Rarely True	Almost Never True	Rarely True	Almost Never True	Often True	Rarely True	No	No	No	No	No	No	No	Yes	Yes	Yes	Yes			Yes	Seldom	Never	Never	Some of the time	Seldom	Seldom	Seldom	Some of the time	Rarely	Never	Occasionally	Rarely	Occasionally	Occasionally
121	23	Women	highschool	no	Almost Always True	Often True	Rarely True	Rarely True	Rarely True	Rarely True	Rarely True	Rarely True	Almost Always True	Almost Never True	Almost Never True	Almost Always True	Often True	Almost Always True	Almost Always True	Almost Always True	Often True	No	No	Yes	Yes	No	No	Yes	No	Yes	Yes	No	No			Seldom	Never	Seldom	Never	Some of the time	Some of the time	Some of the time	Never	Occasionally	Occasionally	Never	Rarely	Occasionally	Rarely
120	22	Women	highschool	no	Rarely True	Rarely True	Rarely True	Often True	Often True	Almost Never True	Almost Always True	Rarely True	Rarely True	Often True	Almost Never True	Rarely True	Almost Never True	Almost Never True	Often True	Almost Always True	Often True	No	No	No	No	No	No	No	Yes	No	Yes	Yes	Yes	No		Never	Never	Never	Most of the time	Some of the time	Some of the time	Never	Some of the time	Sometimes	Never	Daily or almost daily	Occasionally	Often	Often
12	31	Women	University	no	Rarely True	Often True	Almost Never True	Almost Never True	Almost Never True	Almost Never True	Rarely True	Almost Never True	Rarely True	Almost Never True	Almost Never True	Almost Never True	Almost Never True	Almost Never True	Almost Never True	Almost Never True	Rarely True	No	No	Yes	Yes	No	No	No	No	No	Yes	Yes				Never	Never	Never	Some of the time	Seldom	Seldom	Never	Never	Sometimes	Sometimes	Daily or almost daily	Daily or almost daily	Never	Rarely
119	21	Women	University	no	Often True	Rarely True	Almost Always True	Often True	Often True	Almost Always True	Almost Always True	Often True	Often True	Almost Always True	Almost Never True	Almost Always True	Often True	Often True	Often True	Almost Always True	Often True	No	No	Yes	Yes	No	Yes	Yes	No	No	Yes	Yes	No	No	No	Never	Seldom	Never	Some of the time	Never	Some of the time	Seldom	Some of the time	Rarely	Never	Occasionally	Rarely	Occasionally	Occasionally
118	22	Women	highschool	no	Often True	Rarely True	Almost Never True	Rarely True	Often True	Often True	Often True	Often True	Almost Always True	Almost Always True	Almost Never True	Rarely True	Rarely True	Rarely True	Rarely True	Often True	Rarely True	No	No	Yes	No	Yes	Yes	Yes	No	No	Yes	No	No	No	No	Never	Never	Never	Some of the time	Seldom	Seldom	Seldom	Seldom	Occasionally	Occasionally	Sometimes	Sometimes	Sometimes	Occasionally
117	#NULL!	Men	postgraduate	no	Almost Always True	Often True	Almost Always True	Often True	Almost Always True	Almost Never True	Almost Always True	Almost Never True	Rarely True	Almost Always True	Almost Never True	Rarely True	Almost Never True	Almost Never True	Almost Never True	Often True	Almost Never True	No	No	Yes	Yes	Yes	Yes	Yes	No	Yes	Yes	No				Most of the time	Never	Never	Most of the time	Some of the time	Most of the time	Never	Never	Sometimes	Occasionally	Daily or almost daily	Never	Never	Never
116	45	Women	University	no	Often True	Often True	Rarely True	Rarely True	Almost Always True	Rarely True	Almost Always True	Rarely True	Almost Always True	Almost Always True	Almost Never True	Almost Always True	Rarely True	Often True	Almost Always True	Often True	Rarely True	No	No	Yes	Yes	Yes	Yes	Yes	No	Yes	Yes	Yes	Yes	No		Never	Some of the time	Seldom	Most of the time	Most of the time	Most of the time	Most of the time	Most of the time	Often	Often	Daily or almost daily	Daily or almost daily	Daily or almost daily	Daily or almost daily
115	22	Women	postgraduate	no	Rarely True	Almost Always True	Almost Never True	Often True	Almost Always True	Almost Always True	Almost Always True	Rarely True	Rarely True	Almost Always True	Almost Never True	Almost Always True	Often True	Often True	Almost Always True	Almost Always True	Often True	No	No	Yes	Yes	No	No	No	No	Yes	Yes	Yes	No	No	No	Seldom	Some of the time	Never	Never	Never	Seldom	Seldom	Seldom	Rarely	Rarely	Daily or almost daily	Never	Daily or almost daily	Daily or almost daily
114	24	Women	highschool	no	Rarely True	Rarely True	Almost Never True	Often True	Often True	Rarely True	Almost Always True	Rarely True	Often True	Almost Always True	Rarely True	Often True	Often True	Rarely True	Often True	Often True	Rarely True	No	No	No	No	No	No	No	No	No	Yes	Yes	No	No		Never	Never	Never	Most of the time	Most of the time	Never	Never	Most of the time	Sometimes	Sometimes	Daily or almost daily	Occasionally	Often	Sometimes
113	23	Women	University	no	Rarely True	Rarely True	Almost Never True	Rarely True	Almost Never True	Rarely True	Often True	Rarely True	Almost Always True	Almost Never True	Almost Never True	Almost Always True	Often True	Often True	Often True	Almost Always True	Rarely True	No	No	No	No	Yes	Yes	Yes	No	Yes	Yes	Yes	Yes	Yes		Most of the time	Seldom	Seldom	Most of the time	Seldom	Most of the time	Some of the time	Most of the time	Rarely	Rarely	Daily or almost daily	Often	Sometimes	Often
112	45	Women	University	no	Almost Always True	Rarely True	Almost Never True	Almost Always True	Often True	Often True	Almost Always True	Often True	Often True	Often True	Almost Never True	Rarely True	Rarely True	Often True	Often True	Often True	Rarely True	No	No	No	No	Yes	No	No	No	No	No	Yes	Yes	No		Never	Never	Never	Most of the time	Some of the time	Some of the time	Some of the time	Most of the time	Sometimes	Often	Daily or almost daily	Often	Often	Often
111	22	Women	postgraduate	no	Often True	Often True	Often True	Almost Always True	Rarely True	Rarely True	Rarely True	Often True	Almost Always True	Almost Never True	Almost Never True	Often True	Almost Always True	Often True	Often True	Almost Always True	Almost Always True	No	No	Yes	Yes	Yes	Yes	No	No	Yes	Yes	Yes		Yes		Most of the time	Never	Never	Some of the time	Never	Seldom	Never	Seldom	Never	Never	Daily or almost daily	Never	Daily or almost daily	Often
110	2	Women	University	no	Often True	Rarely True	Rarely True	Rarely True	Rarely True	Rarely True	Rarely True	Rarely True	Almost Always True	Rarely True	Rarely True	Rarely True	Rarely True	Rarely True	Rarely True	Rarely True	Rarely True	No	No	Yes	Yes	Yes	Yes	Yes	No	Yes	Yes	Yes	Yes	Yes	Yes	Seldom	Seldom	Seldom	Seldom	Seldom	Seldom	Never	Seldom	Rarely	Never	Rarely	Occasionally	Rarely	Never
109	25	Men	highschool	no	Rarely True	Almost Never True	Rarely True	Almost Never True	Rarely True	Rarely True	Rarely True	Rarely True	Rarely True	Rarely True	Almost Never True	Often True	Rarely True	Often True	Rarely True	Almost Always True	Rarely True	No	No	Yes	Yes	Yes	No	No	No	No	Yes	Yes				Never	Never	Seldom	Most of the time	Most of the time	Most of the time	Seldom	Most of the time	Often	Often	Often	Sometimes	Sometimes	Sometimes
108	19	Women	postgraduate	no	Rarely True	Often True	Often True	Rarely True	Rarely True	Often True	Almost Always True	Rarely True	Almost Always True	Rarely True	Almost Never True	Rarely True	Almost Never True	Rarely True	Often True	Almost Always True	Often True	No	No	No	No	Yes	No	No	No	No	No	Yes				Seldom	Seldom	Never	Most of the time	Some of the time	Seldom	Some of the time	Most of the time	Sometimes	Rarely	Daily or almost daily	Often	Rarely	Sometimes
107	25	Men	highschool	no	Often True	Almost Never True	Often True	Rarely True	Rarely True	Often True	Almost Always True	Rarely True	Almost Never True	Almost Never True	Almost Never True	Almost Always True	Rarely True	Almost Always True	Almost Always True	Almost Always True	Rarely True	No	No	Yes	Yes	Yes	Yes	Yes	No	Yes	Yes	No				Seldom	Most of the time		Some of the time	Some of the time	Some of the time	Seldom	Some of the time	Rarely	Never	Daily or almost daily	Rarely	Often	Sometimes
106	25	Men	postgraduate	no	Rarely True	Often True	Rarely True	Often True	Almost Always True	Almost Always True	Almost Always True	Almost Always True	Often True	Almost Always True	Rarely True	Rarely True	Rarely True	Often True	Often True	Almost Always True	Often True	No	No	No	Yes	No	Yes	No	No	No	Yes	Yes				Seldom	Some of the time	Seldom	Most of the time	Most of the time	Most of the time	Seldom	Seldom	Occasionally	Never	Daily or almost daily	Occasionally	Occasionally	Rarely
105	25	Men	highschool	no	Often True	Often True	Often True	Often True	Rarely True	Rarely True	Rarely True	Often True	Almost Always True	Almost Never True	Almost Never True	Rarely True	Rarely True	Rarely True	Rarely True	Rarely True	Almost Always True	No	No	Yes	Yes	No	No	Yes	No	No	Yes	Yes	No	Yes		Seldom	Most of the time	Never	Most of the time	Never	Seldom	Seldom	Most of the time	Rarely	Rarely	Daily or almost daily	Sometimes	Daily or almost daily	Daily or almost daily
104	44	Women	University	no	Rarely True	Almost Never True	Almost Never True	Almost Never True	Almost Never True	Almost Never True	Rarely True	Almost Never True	Almost Always True	Almost Never True	Almost Never True	Rarely True	Almost Never True	Rarely True	Often True	Often True	Almost Never True	No	No	No	No	Yes	Yes	Yes	No	No	No	No	No		Yes	Seldom	Never	Some of the time	Seldom	Never	Some of the time	Never	Some of the time	Rarely	Occasionally	Daily or almost daily	Rarely	Daily or almost daily	Sometimes
103	22	Women	highschool	no	Often True	Often True	Rarely True	Rarely True	Rarely True	Rarely True	Often True	Rarely True	Often True	Rarely True	Almost Never True	Rarely True	Rarely True	Rarely True	Rarely True	Almost Always True	Almost Always True	No	No	Yes	Yes	No	No	No	No	No	Yes	Yes	No	No	No	Never	Never	Never	Some of the time	Some of the time	Most of the time	Some of the time	Some of the time	Occasionally	Rarely	Daily or almost daily	Occasionally	Daily or almost daily	Often
102	23	Women	highschool	no	Rarely True	Rarely True	Rarely True	Almost Never True	Rarely True	Rarely True	Rarely True	Rarely True	Almost Always True	Almost Always True	Almost Never True	Almost Never True	Almost Never True	Often True	Often True	Almost Always True	Rarely True	No	No	Yes	Yes	Yes	Yes	Yes	No	No	Yes	Yes	Yes	No	No	Seldom	Some of the time	Never	Some of the time	Seldom	Some of the time	Some of the time	Most of the time	Sometimes	Sometimes	Daily or almost daily	Daily or almost daily	Daily or almost daily	Sometimes
101	23	Women	highschool	no	Rarely True	Rarely True	Almost Always True	Rarely True	Often True	Often True	Almost Always True	Almost Always True	Rarely True	Often True	Rarely True	Almost Always True	Often True	Almost Always True	Almost Always True	Almost Always True	Rarely True	No	No	Yes	Yes	Yes	Yes	Yes	No	No	Yes	Yes	Yes	Yes		Most of the time	Most of the time	Never	Most of the time	Most of the time	Most of the time	Never	Most of the time
100		Women	postgraduate	no	Rarely True	Often True	Rarely True	Rarely True	Rarely True	Almost Always True	Rarely True	Often True	Almost Never True	Rarely True	Almost Never True	Almost Never True	Almost Never True	Almost Never True	Almost Always True	Often True	Often True	No	No	Yes	Yes	Yes	Yes	Yes	No	Yes	Yes	Yes	Yes	No		Never	Most of the time	Seldom	Most of the time	Most of the time	Most of the time	Most of the time	Most of the time	Occasionally	Sometimes	Daily or almost daily	Daily or almost daily	Daily or almost daily	Occasionally
1		Women	postgraduate	no	Rarely True	Often True	Rarely True	Rarely True	Often True	Almost Never True	Almost Never True	Often True	Often True	Often True	Almost Never True	Almost Never True	Almost Never True	Almost Never True	Almost Never True	Rarely True	Almost Never True	No	No	No	No	No	No	No	No	No	Yes	No	No	No		Never	Never	Never	Most of the time	Some of the time	Seldom	Seldom	Some of the time	Never	Rarely	Often	Often	Rarely	Never
[truncated: 61 more columns]
