# Supplementary material for: Validity and reliability of the Sustainable HEalthy Diet (SHED) index by comparison with EAT-Lancet diet, Mediterranean diet in Turkish adults
Source: PeerJ. 2024 Sep 30;12:e18120. doi: 10.7717/peerj.18120 (PMC11448654; doi:10.7717/peerj.18120)
Supplement: Supplemental Information 2 [file peerj-12-18120-s002.xlsx]

## Sheet: shed_guvenılırlık_eistatistik
I prefer and eat meat products (poultry, beef, fish) more times per week compared to plant-based food (grains, legumes, fruits and vegetables)	I eat more plant-based food (grains, legumes, fruits and vegetables) instead of animal source foods (meat, dairy products and eggs)	Eat a variety of fruits and vegetables, at least 400 grams or 5 portions daily	I try to avoid meat and fatty meat products and prefer instead beans, legumes, lentils, fish, poultry or low-fat meat	I prefer buying and consuming low salt products	I try to avoid buying and consuming ultra-processed food products	I prefer drinking water (or carbonated water) as a main beverage	I choose low-sugar foods	I limit the frequency of consumption of sweetened beverages and sweets	I control the amount of salt I consume and limit adding salt to my meals	I separate waste and recycle food scraps at home with a composter	I prefer buying and eating food made in Israel as much as possible	I limit my meat consumption	I try to eat crops that are reduced or free of pesticides and herbicides	I try to consume organic food products on a regular basis	I am aware and act to reduce food waste in my close environment	I eat plant-based foods as an alternative to meat on a regular basis	Kindly specify type of composter_Neighborhood	Kindly specify type of composter_Private (backyard)	Kindly specify the type of organic food you consume _vegetable	Kindly specify the type of organic food you consume _fruit	Kindly specify the type of organic food you consume _grains	Kindly specify the type of organic food you consume _dairy products	Kindly specify the type of organic food you consume _meat products	Kindly specify the type of organic food you consume _none	When purchasing organic food, kindly specify where do you buy the products_directly from the farmer	When purchasing organic food, kindly specify where do you buy the products_small shop in town	When purchasing organic food, kindly specify where do you buy the products_social business	When purchasing organic food, kindly specify where do you buy the products_food chain	When purchasing organic food, kindly specify where do you buy the products_self-grow	When purchasing organic food, kindly specify where do you buy the products_other	Where do you buy fruits and vegetables?_self-grow	Where do you buy fruits and vegetables?_direct delivery	Where do you buy fruits and vegetables?_buy directly at a farm	Where do you buy fruits and vegetables?_at the market	Where do you buy fruits and vegetables?_at a grocery store	Where do you buy fruits and vegetables?_green grocery	Where do you buy fruits and vegetables?_supermarket – Home delivery	Where do you buy fruits and vegetables?_shop in person	what frequency do you/eat pre-prepared meals - frozen	what frequency do you/eat pre-prepared meals – chilled (packed)	what frequency do you/eat pre-prepared meals/eat homemade or home cooked food	what frequency do you/eat in restaurants or eateries or cafeteria at work	what frequency do you/cook food by myself	what frequency do you/consume food cooked 1-3 days prior to eating	Kindly specify the type of water you drink and frequency ?Tap water	Kindly specify the type of water you drink and frequency ?Home water filters	Kindly specify the type of water you drink and frequency? Bottled water	At what frequency do you drink? Soft drinks	At what frequency do you drink? Diet beverages
Rarely True	Almost Always True	Often True	Often True	Rarely True	Rarely True	Almost Always True	Often True	Almost Always True	Often True	Almost Never True	Often True	Often True	Rarely True	Rarely True	Rarely True	Often True	No	No	No	No	No	No	No	No	Yes	Yes	No	No	No	No	Never	Never		Some of the time	Most of the time	Some of the time	Some of the time	Some of the time	Sometimes	Sometimes	Daily or almost daily	Never	Daily or almost daily	Sometimes	Seldom	Never	Most of the time	Occasionally	Rarely
Rarely True	Often True	Often True	Often True	Rarely True	Rarely True	Almost Always True	Rarely True	Almost Always True	Often True	Almost Never True	Rarely True	Rarely True	Rarely True	Often True	Often True	Often True	No	No	No	No	No	No	No	No	Yes	No	Yes	No	Yes		Some of the time	Seldom		Some of the time	Seldom	Most of the time	Never	Most of the time	Often	Occasionally	Daily or almost daily		Daily or almost daily	Sometimes	Most of the time	Never	Most of the time	Sometimes	Rarely
Rarely True	Almost Never True	Almost Never True	Almost Never True	Almost Never True	Rarely True	Almost Never True	Often True	Almost Always True	Almost Never True	Almost Never True	Almost Never True	Almost Never True	Often True	Often True	Rarely True	Almost Never True	No	No	No	No	No	No	No	No	No	Yes	Yes				Seldom	Some of the time	Never	Some of the time	Never	Seldom	Never	Most of the time	Occasionally	Occasionally	Sometimes	Sometimes	Often	Never	Seldom	Never	Most of the time	Daily or almost daily	Rarely
Rarely True	Almost Always True	Almost Never True	Rarely True	Rarely True	Rarely True	Almost Never True	Rarely True	Almost Never True	Rarely True	Almost Never True	Often True	Almost Never True	Rarely True	Often True	Rarely True	Almost Never True	No	No	No	No	No	No	No	No	No	Yes	Yes		No	Yes	Never	Never	Never	Some of the time	Seldom	Seldom	Seldom	Most of the time	Never	Never	Sometimes		Often	Sometimes	Seldom	Never	Most of the time	Often	Often
Rarely True	Rarely True	Rarely True	Often True	Often True	Rarely True	Almost Always True	Often True	Often True	Often True	Rarely True	Often True	Rarely True	Rarely True	Often True	Rarely True	Almost Always True	No	No	No	No	No	No	No	No	No	Yes	Yes				Never	Seldom	Never	Some of the time	Some of the time	Some of the time	Seldom	Most of the time	Occasionally	Sometimes	Daily or almost daily	Sometimes	Daily or almost daily	Sometimes	Seldom	Never	Most of the time	Rarely	Rarely
Rarely True	Almost Never True	Rarely True	Almost Always True	Almost Always True	Almost Always True	Almost Always True	Almost Always True	Almost Always True	Almost Always True	Almost Never True	Almost Always True	Often True	Almost Always True	Almost Always True	Almost Always True	Often True	No	No	No	No	No	No	No	No	No	Yes	Yes	No	No		Never	Seldom	Never	Some of the time	Never	Seldom	Some of the time	Some of the time	Never	Never	Daily or almost daily		Often	Sometimes	Seldom	Some of the time	Most of the time	Sometimes	Sometimes
Rarely True	Often True	Often True	Rarely True	Rarely True	Rarely True	Almost Always True	Often True	Almost Always True	Rarely True	Almost Never True	Almost Always True	Almost Never True	Almost Always True	Rarely True	Almost Always True	Rarely True	No	No	No	No	No	No	No	No	Yes	Yes	Yes	No	No		Never	Seldom	Never		Some of the time	Some of the time	Seldom	Most of the time	Rarely	Rarely	Daily or almost daily	Sometimes	Daily or almost daily	Daily or almost daily	Seldom	Never	Most of the time	Rarely	Rarely
Rarely True	Often True	Often True	Rarely True	Rarely True	Almost Always True	Often True	Almost Always True	Almost Always True	Rarely True	Almost Never True	Often True	Almost Never True	Rarely True	Rarely True	Often True	Almost Never True	No	No	No	No	No	No	No	No	Yes	No	No	No	No		Never	Some of the time	Never	Some of the time	Most of the time	Never	Never	Most of the time	Never	Never	Rarely		Daily or almost daily	Rarely	Some of the time	Never	Some of the time	Sometimes	Occasionally
Rarely True	Often True	Rarely True	Rarely True	Almost Never True	Rarely True	Almost Always True	Almost Never True	Often True	Rarely True	Almost Never True	Almost Always True	Almost Never True	Often True	Rarely True	Often True	Rarely True	No	No	No	No	No	No	No	No	Yes	Yes	Yes	No	No	No	Seldom	Seldom	Never	Some of the time	Some of the time	Some of the time	Some of the time	Some of the time	Sometimes	Rarely	Daily or almost daily	Sometimes	Often	Rarely	Seldom	Never	Most of the time	Occasionally	Rarely
Rarely True	Almost Never True	Rarely True	Almost Always True	Often True	Rarely True	Almost Always True	Often True	Almost Always True	Often True	Almost Never True	Almost Always True	Almost Always True	Almost Always True	Almost Always True	Almost Always True	Almost Always True	No	No	No	No	No	No	No	No	No	Yes	Yes	No			Never	Never	Never	Some of the time	Some of the time	Some of the time	Seldom	Seldom	Rarely	Rarely	Daily or almost daily		Often	Sometimes	Some of the time	Most of the time	Most of the time	Occasionally	Occasionally
Rarely True	Rarely True	Rarely True	Often True	Often True	Often True	Often True	Often True	Often True	Often True	Almost Never True	Almost Never True	Almost Never True	Rarely True	Rarely True	Often True	Rarely True	No	No	No	No	No	No	No	No	Yes	Yes	Yes		Yes		Some of the time	Seldom	Never	Some of the time	Some of the time	Most of the time	Some of the time	Some of the time	Rarely	Never	Daily or almost daily	Sometimes	Daily or almost daily	Rarely	Seldom	Never	Most of the time	Often	Rarely
Rarely True	Often True	Almost Never True	Almost Never True	Almost Never True	Almost Never True	Often True	Almost Never True	Almost Never True	Rarely True	Almost Never True	Often True	Often True	Rarely True	Rarely True	Almost Always True	Almost Always True	No	No	No	No	No	No	No	No	No	Yes	No	No	Yes		Some of the time	Seldom	Never	Some of the time	Never	Never	Never	Most of the time	Rarely	Occasionally	Daily or almost daily		Daily or almost daily	Sometimes	Most of the time	Never	Some of the time	Sometimes	Rarely
Rarely True	Almost Always True	Almost Always True	Almost Always True	Often True	Often True	Almost Always True	Almost Always True	Almost Always True	Often True	Almost Never True	Almost Always True	Almost Always True	Often True	Rarely True	Almost Always True	Almost Always True	No	No	No	No	No	No	No	No	No	No	No	No	Yes	No	Some of the time	Some of the time	Never	Some of the time	Some of the time	Some of the time	Never	Most of the time	Never	Never	Daily or almost daily	Rarely	Daily or almost daily	Never	Some of the time	Never	Most of the time	Occasionally	Rarely
Rarely True	Often True	Almost Always True	Often True	Rarely True	Almost Always True	Almost Always True	Often True	Almost Always True	Often True	Almost Never True	Often True	Rarely True	Rarely True	Often True	Almost Always True	Often True	No	No	No	No	No	No	No	No	Yes	Yes	No	No	No	No	Seldom	Never	Never	Some of the time	Never	Seldom	Never	Some of the time	Never	Never	Daily or almost daily		Daily or almost daily	Sometimes	Some of the time	Most of the time	Seldom	Sometimes	Rarely
Rarely True	Almost Never True	Rarely True	Rarely True	Rarely True	Rarely True	Often True	Rarely True	Rarely True	Rarely True	Almost Never True	Often True	Almost Never True	Almost Never True	Rarely True	Rarely True	Almost Never True	No	No	No	No	No	No	No	No	No	Yes	Yes	Yes	No		Seldom	Never	Never	Some of the time	Seldom	Some of the time	Some of the time	Some of the time	Often	Sometimes	Daily or almost daily	Daily or almost daily	Sometimes		Seldom	Never	Most of the time	Sometimes	Sometimes
Rarely True	Often True	Almost Always True	Often True	Almost Always True	Almost Always True	Almost Always True	Rarely True	Almost Always True	Almost Always True	Almost Never True	Almost Always True	Almost Never True	Rarely True	Often True	Often True	Often True	No	No	No	No	No	No	No	No	Yes	Yes	Yes	No	Yes		Some of the time	Never	Never	Some of the time	Never	Most of the time	Most of the time	Most of the time						Sometimes
Rarely True	Often True	Rarely True	Often True	Rarely True	Rarely True	Often True	Rarely True	Rarely True	Rarely True	Almost Never True	Rarely True	Rarely True	Often True	Often True	Often True	Often True	No	No	No	No	No	No	No	No	No	Yes	Yes	Yes	No		Never	Seldom	Never	Some of the time	Seldom	Most of the time	Seldom	Some of the time	Rarely	Rarely	Daily or almost daily	Sometimes	Daily or almost daily	Sometimes	Seldom	Some of the time	Most of the time	Daily or almost daily	Rarely
Rarely True	Rarely True	Often True	Almost Always True	Almost Always True	Often True	Often True	Often True	Often True	Rarely True	Almost Never True	Almost Never True	Almost Never True	Almost Never True	Rarely True	Often True	Rarely True	No	No	No	No	No	No	No	No	Yes	No	Yes	No		Yes	Never	Seldom	Never	Some of the time	Seldom	Some of the time	Never	Never	Sometimes	Sometimes	Sometimes		Sometimes	Sometimes	Seldom	Some of the time	Most of the time	Sometimes	Sometimes
Rarely True	Often True	Rarely True	Almost Always True	Often True	Rarely True	Often True	Almost Never True	Often True	Often True	Rarely True	Rarely True	Almost Never True	Rarely True	Rarely True	Rarely True	Almost Never True	No	No	No	No	No	No	No	No	No	Yes	Yes	No	No	No	Never	Never	Never	Some of the time	Some of the time	Some of the time	Some of the time	Some of the time	Occasionally	Rarely	Occasionally	Sometimes	Rarely	Never	Most of the time	Some of the time	Most of the time	Often	Often
Rarely True	Almost Always True	Often True	Rarely True	Rarely True	Often True	Almost Always True	Often True	Often True	Often True	Almost Never True	Rarely True	Rarely True	Often True	Often True	Often True	Rarely True	No	No	No	No	No	No	No	No	Yes	Yes	Yes		No		Seldom	Seldom	Never	Seldom	Seldom	Seldom	Never	Seldom	Occasionally	Occasionally	Occasionally		Occasionally	Rarely	Some of the time	Seldom	Some of the time	Sometimes	Often
Rarely True	Often True	Rarely True	Rarely True	Rarely True	Rarely True	Rarely True	Rarely True	Often True	Almost Never True	Almost Never True	Rarely True	Almost Never True	Almost Never True	Rarely True	Rarely True	Almost Never True	No	No	No	No	No	No	No	No	Yes	Yes	No	Yes	No	No	Never	Seldom	Never	Some of the time	Most of the time	Most of the time	Most of the time	Most of the time	Rarely	Sometimes	Sometimes	Sometimes	Rarely	Rarely	Seldom	Some of the time	Seldom	Sometimes	Sometimes
Rarely True	Often True	Almost Always True	Almost Always True	Almost Always True	Almost Always True	Often True	Almost Always True	Almost Always True	Almost Always True	Almost Never True	Almost Never True	Rarely True	Almost Never True	Almost Never True	Almost Never True	Almost Never True	No	No	No	No	No	No	No	No	Yes	No	Yes	Yes			Never	Seldom	Never	Some of the time	Some of the time	Seldom	Never	Seldom	Rarely	Rarely	Never		Sometimes	Sometimes	Most of the time	Seldom	Some of the time	Occasionally	Occasionally
Rarely True	Often True	Rarely True	Often True	Rarely True	Almost Never True	Often True	Almost Never True	Almost Never True	Often True	Almost Never True	Almost Always True	Rarely True	Often True	Rarely True	Rarely True	Rarely True	No	No	No	No	No	No	No	No	No	Yes	Yes	No	No	No	Never	Never	Never	Some of the time	Most of the time	Most of the time	Never	Most of the time	Rarely	Rarely	Daily or almost daily	Never	Never	Rarely	Seldom	Never	Most of the time	Often	Rarely
Rarely True	Rarely True	Rarely True	Almost Never True	Rarely True	Rarely True	Often True	Rarely True	Rarely True	Rarely True	Almost Never True	Almost Never True	Almost Never True	Almost Never True	Almost Never True	Rarely True	Almost Never True	No	No	No	No	No	No	No	No	No	No	Yes	No	No	No	Seldom	Seldom	Never	Seldom	Seldom	Seldom	Seldom	Seldom	Occasionally	Rarely	Sometimes		Occasionally	Sometimes	Most of the time	Never	Some of the time	Sometimes	Sometimes
Rarely True	Often True	Often True	Rarely True	Almost Always True	Almost Always True	Almost Always True	Almost Always True	Almost Always True	Almost Always True	Almost Never True	Almost Always True	Almost Always True	Often True	Almost Always True	Almost Always True	Often True	No	No	No	No	No	No	No	No	Yes	Yes	No	No	Yes	No	Some of the time	Seldom	Never	Some of the time	Seldom	Never	Some of the time	Seldom	Occasionally	Rarely	Never	Sometimes	Rarely	Never	Seldom	Never	Seldom	Sometimes	Rarely
Often True	Often True	Often True	Almost Never True	Rarely True	Almost Never True	Almost Always True	Almost Never True	Almost Never True	Rarely True	Almost Never True	Almost Never True	Rarely True	Almost Never True	Almost Never True	Almost Never True	Almost Never True	No	No	No	No	No	No	No	No	Yes	Yes	No	No	Yes		Seldom	Seldom	Never	Some of the time	Some of the time	Some of the time	Some of the time	Some of the time	Occasionally	Occasionally	Sometimes		Occasionally	Never	Seldom	Seldom	Most of the time	Sometimes	Rarely
Often True	Rarely True	Often True	Almost Never True	Rarely True	Rarely True	Almost Never True	Almost Never True	Rarely True	Almost Never True	Almost Never True	Rarely True	Rarely True	Rarely True	Often True	Often True	Often True	No	No	No	No	No	No	No	No	No	Yes	No	No	No		Seldom	Seldom	Never	Seldom	Seldom	Seldom	Seldom	Seldom	Rarely	Rarely	Sometimes	Sometimes	Rarely	Rarely	Seldom	Most of the time	Seldom	Occasionally	Rarely
Often True	Almost Always True	Rarely True	Almost Always True	Often True	Often True	Almost Always True	Rarely True	Often True	Often True	Almost Never True	Almost Always True	Almost Always True	Almost Always True	Almost Always True	Almost Always True	Almost Always True	No	No	No	No	No	No	No	No	No	Yes	Yes	No			Never	Seldom	Never	Some of the time	Some of the time	Some of the time	Seldom	Seldom	Never	Never	Daily or almost daily		Daily or almost daily	Sometimes	Most of the time	Seldom	Most of the time	Sometimes	Sometimes
Often True	Often True	Almost Always True	Rarely True	Rarely True	Almost Never True	Often True	Rarely True	Almost Always True	Almost Always True	Rarely True	Rarely True	Rarely True	Often True	Often True	Often True	Rarely True	No	No	No	No	No	No	No	No	Yes	Yes	Yes	No	No	No	Never	Some of the time	Never	Seldom	Some of the time	Most of the time	Never	Seldom	Sometimes	Sometimes	Sometimes	Daily or almost daily	Rarely	Rarely	Seldom	Never	Seldom	Rarely	Rarely
Often True	Rarely True	Often True	Often True	Rarely True	Rarely True	Often True	Often True	Often True	Rarely True	Rarely True	Rarely True	Rarely True	Almost Never True	Rarely True	Almost Never True	Rarely True	No	No	No	No	No	No	No	No	No	No	Yes		Yes		Never	Seldom	Never	Some of the time	Seldom	Some of the time	Most of the time	Some of the time	Sometimes	Rarely	Sometimes		Daily or almost daily	Sometimes		Never	Most of the time	Sometimes	Occasionally
Often True	Often True	Rarely True	Rarely True	Almost Never True	Rarely True	Rarely True	Rarely True	Rarely True	Rarely True	Almost Never True	Rarely True	Almost Never True	Rarely True	Rarely True	Rarely True	Rarely True	No	No	No	No	No	No	No	No	Yes	Yes	No				Never	Never	Never	Some of the time	Some of the time	Some of the time	Most of the time	Some of the time	Sometimes	Occasionally	Daily or almost daily		Daily or almost daily	Sometimes	Seldom	Never	Most of the time	Daily or almost daily	Rarely
Often True	Rarely True	Rarely True	Rarely True	Almost Never True	Rarely True	Rarely True	Rarely True	Rarely True	Rarely True	Almost Never True	Almost Never True	Rarely True	Rarely True	Rarely True	Almost Never True	Rarely True	No	No	No	No	No	No	No	No	Yes	Yes	Yes	Yes	No	No	Never	Seldom	Never	Some of the time	Some of the time	Some of the time	Some of the time	Some of the time	Sometimes	Rarely	Daily or almost daily		Often	Sometimes	Most of the time	Never	Some of the time	Occasionally	Occasionally
Often True	Rarely True	Often True	Often True	Often True	Often True	Often True	Often True	Often True	Often True	Rarely True	Often True	Rarely True	Often True	Rarely True	Often True	Rarely True	No	No	No	No	No	No	No	No	No	Yes	Yes	Yes	No		Never	Seldom	Never	Some of the time	Some of the time	Some of the time	Most of the time	Most of the time	Sometimes	Sometimes	Daily or almost daily	Sometimes	Daily or almost daily	Rarely	Most of the time	Never	Most of the time	Often	Occasionally
Often True	Rarely True	Often True	Often True	Often True	Often True	Often True	Often True	Often True	Often True	Almost Never True	Almost Never True	Almost Never True	Almost Never True	Rarely True	Rarely True	Almost Never True	No	No	No	No	No	No	No	No	Yes	Yes	Yes	No	Yes	Yes	Some of the time	Some of the time	Never	Seldom	Some of the time	Some of the time	Seldom	Seldom	Occasionally	Occasionally	Sometimes		Daily or almost daily	Sometimes	Most of the time	Most of the time	Most of the time	Often	Sometimes
Often True	Almost Always True	Almost Never True	Rarely True	Rarely True	Rarely True	Almost Never True	Rarely True	Almost Never True	Rarely True	Rarely True	Rarely True	Rarely True	Rarely True	Rarely True	Rarely True	Rarely True	No	No	No	No	No	No	No	No	Yes	Yes	Yes		Yes		Some of the time	Some of the time	Never	Some of the time					Never	Never	Daily or almost daily	Sometimes	Daily or almost daily	Daily or almost daily	Most of the time	Never	Seldom	Rarely	Sometimes
Often True	Often True	Often True	Often True	Often True	Rarely True	Often True	Rarely True	Almost Never True	Rarely True	Almost Never True	Often True	Often True	Often True	Often True	Often True	Often True	No	No	No	No	No	No	No	No	Yes	Yes	Yes	No	No	No	Never	Some of the time	Never	Some of the time	Seldom	Most of the time	Most of the time	Most of the time	Rarely	Rarely	Daily or almost daily		Daily or almost daily	Sometimes	Some of the time	Most of the time	Most of the time	Sometimes	Sometimes
Often True	Rarely True	Rarely True	Rarely True	Almost Always True	Rarely True	Almost Never True	Rarely True	Often True	Almost Always True	Almost Never True	Often True	Rarely True	Almost Always True	Often True	Almost Always True	Rarely True	No	No	No	No	No	No	No	No	Yes	Yes	No	No	No		Seldom	Some of the time	Never	Some of the time	Seldom	Some of the time	Some of the time	Most of the time	Rarely	Occasionally	Daily or almost daily	Sometimes	Occasionally	Never	Seldom	Never	Seldom	Rarely	Rarely
Often True	Often True	Rarely True	Rarely True	Rarely True	Rarely True	Rarely True	Rarely True	Rarely True	Rarely True	Almost Never True	Rarely True	Rarely True	Rarely True	Rarely True	Rarely True	Rarely True	No	No	No	No	No	No	No	No	Yes	No	Yes	Yes			Some of the time	Seldom	Seldom			Seldom			Never	Never	Occasionally		Occasionally	Sometimes	Some of the time	Most of the time	Some of the time	Sometimes	Rarely
Often True	Rarely True	Rarely True	Rarely True	Almost Never True	Rarely True	Almost Never True	Almost Never True	Rarely True	Rarely True	Almost Never True	Rarely True	Almost Never True	Rarely True	Rarely True	Rarely True	Almost Never True	No	No	No	No	No	No	No	No	No	No	No				Seldom	Some of the time	Seldom	Some of the time		Some of the time	Some of the time	Some of the time	Rarely	Never	Never	Rarely	Rarely	Never	Seldom	Never	Most of the time	Sometimes	Occasionally
Often True	Often True	Rarely True	Rarely True	Almost Always True	Rarely True	Almost Always True	Rarely True	Rarely True	Often True	Almost Never True	Rarely True	Rarely True	Often True	Rarely True	Often True	Rarely True	No	No	No	No	No	No	No	No	Yes	Yes	Yes				Never	Some of the time	Seldom	Some of the time	Seldom	Some of the time	Some of the time	Some of the time	Occasionally	Sometimes	Daily or almost daily		Daily or almost daily	Never	Seldom	Seldom	Seldom	Occasionally	Occasionally
Often True	Rarely True	Rarely True	Rarely True	Rarely True	Rarely True	Rarely True	Rarely True	Rarely True	Rarely True	Rarely True	Rarely True	Rarely True	Rarely True	Rarely True	Rarely True	Rarely True	No	No	No	No	No	No	No	No	No	Yes	Yes	No	Yes	No	Never	Never	Seldom	Never	Never	Never	Seldom	Seldom	Rarely	Rarely	Sometimes	Sometimes	Daily or almost daily	Rarely	Some of the time	Never	Some of the time	Rarely	Rarely
Often True	Almost Never True	Rarely True	Rarely True	Almost Always True	Rarely True	Often True	Almost Always True	Rarely True	Almost Always True	Almost Never True	Almost Always True	Often True	Almost Always True	Almost Always True	Almost Always True	Almost Always True	No	No	No	No	No	No	No	No	No	Yes	Yes	No			Never	Never	Seldom	Never	Never	Most of the time	Never	Some of the time	Rarely	Rarely	Daily or almost daily		Sometimes	Sometimes	Some of the time	Some of the time	Some of the time	Sometimes	Rarely
Often True	Often True	Rarely True	Rarely True	Rarely True	Rarely True	Rarely True	Rarely True	Rarely True	Rarely True	Almost Never True	Often True	Rarely True	Rarely True	Almost Never True	Rarely True	Rarely True	No	No	No	No	No	No	No	No	Yes	Yes	Yes	Yes	Yes	Yes	Seldom	Seldom	Seldom	Some of the time	Some of the time	Never	Some of the time	Some of the time	Often	Sometimes	Sometimes	Occasionally	Often		Some of the time	Never	Most of the time	Rarely	Rarely
Often True	Often True	Almost Never True	Rarely True	Almost Never True	Rarely True	Almost Always True	Almost Never True	Almost Always True	Rarely True	Almost Never True	Often True	Almost Never True	Often True	Often True	Often True	Almost Never True	No	No	No	No	No	No	No	No	Yes	Yes	Yes	Yes	Yes		Some of the time	Seldom	Seldom	Some of the time	Some of the time	Some of the time	Seldom	Seldom	Rarely	Rarely	Sometimes		Sometimes	Sometimes	Most of the time	Never	Most of the time	Often	Rarely
Often True	Rarely True	Rarely True	Rarely True	Almost Never True	Almost Never True	Almost Never True	Rarely True	Rarely True	Rarely True	Almost Never True	Often True	Often True	Almost Always True	Often True	Often True	Rarely True	No	No	No	No	No	No	No	No	Yes	Yes	No	No	Yes		Some of the time	Some of the time	Seldom	Some of the time	Some of the time	Some of the time	Never	Most of the time	Sometimes	Rarely	Daily or almost daily	Daily or almost daily	Daily or almost daily	Daily or almost daily	Seldom	Never	Most of the time	Often	Rarely
Almost Never True	Often True	Often True	Almost Always True	Almost Always True	Almost Always True	Almost Always True	Almost Always True	Rarely True	Almost Always True	Almost Never True	Almost Always True	Almost Always True	Often True	Often True	Almost Always True	Almost Always True	No	No	No	No	No	No	No	No	No	Yes	Yes	No	No	No	Never	Some of the time	Seldom	Some of the time	Never	Never	Some of the time	Some of the time	Never	Never	Daily or almost daily		Often	Sometimes	Most of the time	Never	Most of the time	Sometimes	Often
Almost Never True	Rarely True	Rarely True	Often True	Rarely True	Rarely True	Rarely True	Rarely True	Rarely True	Often True	Almost Never True	Rarely True	Rarely True	Rarely True	Rarely True	Often True	Rarely True	No	No	No	No	No	No	No	No	No	Yes	No	No	No	No	Never	Seldom	Seldom	Some of the time	Some of the time	Some of the time	Some of the time	Some of the time	Sometimes	Occasionally	Daily or almost daily	Sometimes	Daily or almost daily	Rarely	Seldom	Never	Most of the time	Rarely	Rarely
Almost Never True	Often True	Often True	Almost Always True	Often True	Often True	Often True	Often True	Often True	Often True	Almost Never True	Often True	Rarely True	Often True	Almost Always True	Almost Always True	Almost Always True	No	No	No	No	No	No	No	No	No	No	Yes	No	No		Never	Seldom	Seldom	Some of the time	Some of the time	Some of the time	Seldom	Most of the time	Rarely	Rarely	Daily or almost daily		Often	Sometimes	Seldom	Seldom	Some of the time	Often	Rarely
Almost Never True	Rarely True	Almost Never True	Rarely True	Rarely True	Rarely True	Almost Always True	Rarely True	Rarely True	Rarely True	Almost Never True	Often True	Almost Never True	Rarely True	Rarely True	Often True	Rarely True	No	No	No	No	No	No	No	No	Yes	Yes	No	No	No		Never	Seldom	Some of the time	Some of the time	Never	Never	Never	Seldom	Rarely	Never	Daily or almost daily	Occasionally	Never	Occasionally	Seldom	Never	Most of the time	Often	Rarely
Almost Never True	Rarely True	Rarely True	Almost Always True	Often True	Almost Never True	Often True	Rarely True	Often True	Almost Always True	Almost Never True	Almost Always True	Rarely True	Rarely True	Almost Always True	Almost Always True	Rarely True	No	No	No	No	No	No	No	No	Yes	Yes	Yes	Yes	Yes		Some of the time	Seldom	Some of the time	Some of the time	Some of the time	Most of the time	Never	Most of the time	Rarely	Never	Daily or almost daily		Daily or almost daily	Sometimes	Most of the time	Never	Most of the time	Sometimes	Sometimes
Almost Never True	Rarely True	Rarely True	Almost Always True	Often True	Often True	Rarely True	Often True	Often True	Often True	Almost Never True	Rarely True	Almost Always True	Often True	Often True	Often True	Almost Always True	No	No	No	No	No	No	No	No	No	Yes	No	No	Yes		Some of the time	Some of the time	Some of the time	Some of the time	Some of the time	Most of the time	Seldom	Seldom	Never	Never	Daily or almost daily	Sometimes	Daily or almost daily	Never	Seldom	Never	Most of the time	Daily or almost daily	Rarely
Almost Never True	Often True	Rarely True	Almost Always True	Almost Always True	Often True	Almost Always True	Almost Always True	Almost Always True	Almost Always True	Almost Never True	Almost Always True	Almost Never True	Often True	Almost Always True	Almost Always True	Often True	No	No	No	No	No	No	No	No	Yes	Yes	No	No	Yes		Seldom	Some of the time	Some of the time	Some of the time	Most of the time				Never	Never	Daily or almost daily		Daily or almost daily	Sometimes	Most of the time	Never	Some of the time	Occasionally	Occasionally
Almost Never True	Often True	Rarely True	Often True	Rarely True	Often True	Almost Always True	Rarely True	Rarely True	Rarely True	Almost Never True	Rarely True	Often True	Rarely True	Often True	Almost Always True	Almost Always True	No	No	No	No	No	No	No	No	Yes	Yes	No	No	Yes	No	Some of the time	Some of the time	Some of the time	Never	Never	Seldom	Never	Never	Occasionally	Rarely	Daily or almost daily	Sometimes	Daily or almost daily	Occasionally	Seldom	Never	Seldom	Sometimes	Rarely
Almost Always True	Rarely True	Rarely True	Almost Always True	Almost Never True	Almost Never True	Almost Always True	Almost Always True	Rarely True	Rarely True	Almost Never True	Almost Never True	Almost Always True	Almost Always True	Almost Always True	Almost Always True	Almost Always True	No	No	No	No	No	No	No	No	Yes	Yes	No	No	No	Yes	Never	Some of the time	Some of the time	Some of the time	Some of the time	Some of the time	Never	Never	Rarely	Never	Daily or almost daily		Sometimes	Sometimes		Never	Seldom	Occasionally	Occasionally
Almost Always True	Rarely True	Rarely True	Almost Always True	Almost Always True	Almost Always True	Almost Always True	Almost Always True	Almost Always True	Almost Always True	Almost Never True	Almost Always True	Almost Always True	Almost Always True	Almost Always True	Almost Always True	Almost Always True	No	No	No	No	No	No	No	No	Yes	Yes	Yes	No	Yes	No	Some of the time	Some of the time	Some of the time	Some of the time	Never	Seldom	Never	Some of the time	Never	Never	Daily or almost daily	Rarely	Daily or almost daily	Occasionally	Seldom	Never	Most of the time	Rarely	Rarely
Almost Always True	Almost Always True	Often True	Often True	Almost Never True	Often True	Almost Never True	Rarely True	Rarely True	Almost Never True	Almost Never True	Rarely True	Almost Never True	Rarely True	Rarely True	Often True	Often True	No	No	No	No	No	No	No	No	No	No	Yes	Yes	No	Yes	Never	Seldom	Some of the time	Some of the time	Some of the time	Never	Some of the time	Most of the time	Never	Never	Daily or almost daily		Daily or almost daily	Sometimes	Seldom	Never	Most of the time	Sometimes	Rarely
Almost Always True	Almost Always True	Often True	Often True	Often True	Rarely True	Often True	Rarely True	Rarely True	Rarely True	Almost Never True	Rarely True	Almost Never True	Rarely True	Rarely True	Often True	Often True	No	No	No	No	No	No	No	No	No	No	Yes	No	No	No	Never	Never	Some of the time	Some of the time	Seldom	Seldom	Most of the time	Some of the time	Rarely	Sometimes	Daily or almost daily	Occasionally	Often		Most of the time	Never	Some of the time	Rarely	Rarely
[truncated: 9 more columns]
